# Supplementary material for: Fungal endophytes from arid areas of Andalusia: high potential sources for antifungal and antitumoral agents
Source: PubMed Central journal article supplement (PMC6021435; doi:10.1038/s41598-018-28192-5), 2018-06-27
Supplement: 41598_2018_28192_MOESM1_ESM.pdf [file 41598_2018_28192_MOESM1_ESM.pdf]

# **Fungal endophytes from arid areas of Andalusia: high potential sources for antifungal and antitumoral agents**

**Victor González-Menéndez<sup>1\*</sup>, Gloria Crespo<sup>1</sup>, Nuria de Pedro<sup>1</sup>, Caridad Diaz<sup>1</sup>, Jesús Martín<sup>1</sup>, Rachel Serrano<sup>1</sup>, Thomas A. Mackenzie<sup>1</sup>, Carlos Justicia<sup>1</sup>, M. Reyes González-Tejero<sup>2</sup>, M. Casares<sup>2</sup>, Francisca Vicente<sup>1</sup>, Fernando Reyes<sup>1</sup>, José R. Tormo<sup>1</sup> and Olga Genilloud<sup>1</sup>.**

<sup>1</sup> Fundación MEDINA, Avda. del conocimiento 34, 18016 Granada, SPAIN

<sup>2</sup> Departamento de Botánica, Facultad de Farmacia, Universidad de Granada, C/ Prof. Clavera, s/n, 18011, Granada, SPAIN

\*victor.gonzalez@medinaandalucia.es

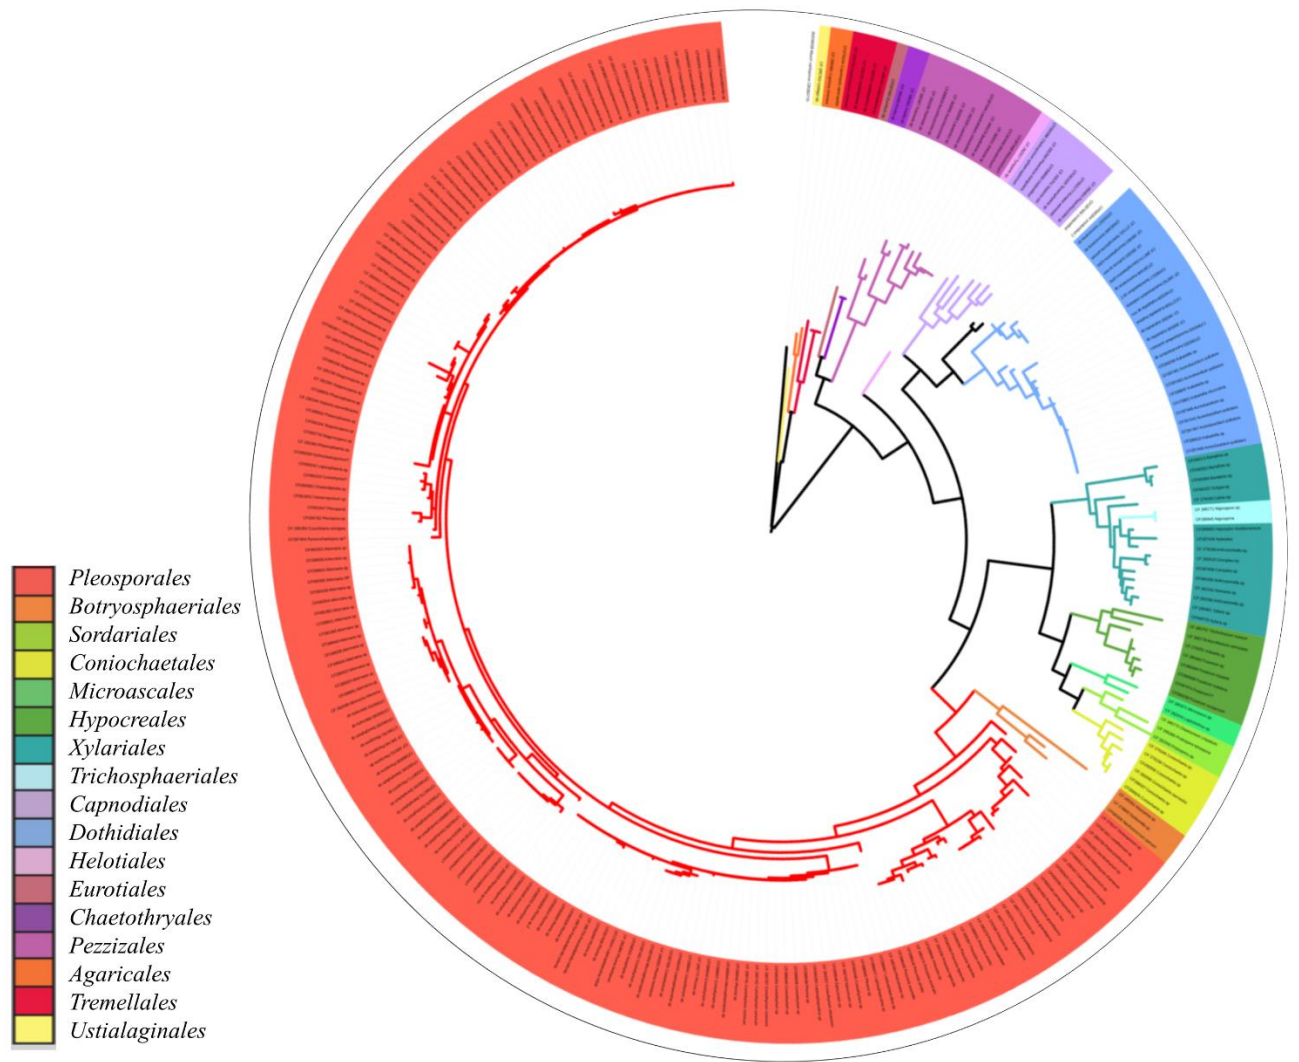

**Supplementary Figure 1.** Neighbor-joining tree based on nucleotide sequences of 28S rDNA gene of the 349 fungal isolates. Major taxonomic orders are labelled using differential color coding.

**Supplementary Table 1.** Total list of fungal isolates sort by genus.

| Isolate   | Genus                  | Species                      | Order                 | Substrate                         |
|-----------|------------------------|------------------------------|-----------------------|-----------------------------------|
| CF-288903 | <i>Alternaria</i>      | <i>alternata</i>             | <i>Pleosporales</i>   | <i>Arthrocnemum macrostachyum</i> |
| CF-090318 | <i>Alternaria</i>      | <i>alternata</i>             | <i>Pleosporales</i>   | <i>Artemisia barrelieri</i>       |
| CF-090322 | <i>Alternaria</i>      | <i>alternata</i>             | <i>Pleosporales</i>   | <i>Artemisia barrelieri</i>       |
| CF-090366 | <i>Alternaria</i>      | <i>cumini</i>                | <i>Pleosporales</i>   | <i>Sedum sediforme</i>            |
| CF-090246 | <i>Alternaria</i>      | <i>infectoria</i>            | <i>Pleosporales</i>   | <i>Genista umbellata</i>          |
| CF-090261 | <i>Alternaria</i>      | <i>infectoria</i>            | <i>Pleosporales</i>   | <i>Asparagus horridus</i>         |
| CF-282008 | <i>Alternaria</i>      | sp.                          | <i>Pleosporales</i>   | <i>Retama sphaerocarpa</i>        |
| CF-288921 | <i>Alternaria</i>      | sp.                          | <i>Pleosporales</i>   | <i>Ononis tridentata</i>          |
| CF-288922 | <i>Alternaria</i>      | sp.                          | <i>Pleosporales</i>   | <i>Ononis tridentata</i>          |
| CF-288909 | <i>Alternaria</i>      | sp.                          | <i>Pleosporales</i>   | <i>Frankenia pulvirulenta</i>     |
| CF-288960 | <i>Alternaria</i>      | sp.                          | <i>Pleosporales</i>   | <i>Frankenia pulvirulenta</i>     |
| CF-288961 | <i>Alternaria</i>      | sp.                          | <i>Pleosporales</i>   | <i>Sonchus crassifolius</i>       |
| CF-288939 | <i>Alternaria</i>      | sp.                          | <i>Pleosporales</i>   | <i>Suaeda vera</i>                |
| CF-288904 | <i>Alternaria</i>      | sp.                          | <i>Pleosporales</i>   | <i>Arthrocnemum macrostachyum</i> |
| CF-090752 | <i>Alternaria</i>      | sp.                          | <i>Pleosporales</i>   | <i>Thymelaea hirsuta</i>          |
| CF-090365 | <i>Alternaria</i>      | sp.                          | <i>Pleosporales</i>   | <i>Sedum sediforme</i>            |
| CF-090395 | <i>Alternaria</i>      | sp.                          | <i>Pleosporales</i>   | <i>Arthrocnemum macrostachyum</i> |
| CF-090254 | <i>Alternaria</i>      | sp.                          | <i>Pleosporales</i>   | <i>Asparagus horridus</i>         |
| CF-282338 | <i>Anthostomella</i>   | sp.                          | <i>Xylariales</i>     | <i>Dittrichia viscosa</i>         |
| CF-090350 | <i>Anthostomella</i>   | sp.                          | <i>Xylariales</i>     | <i>Pinus halepensis</i>           |
| CF-279248 | <i>Anthostomella</i>   | sp.                          | <i>Xylariales</i>     | <i>Retama sphaerocarpa</i>        |
| CF-287454 | <i>Ascochyta</i>       | sp.                          | <i>Pleosporales</i>   | <i>Rosmarinus eriocalyx</i>       |
| CF-287439 | <i>Ascochyta</i>       | sp.                          | <i>Pleosporales</i>   | <i>Ononis fruticosa</i>           |
| CF-282337 | <i>Ascochyta</i>       | sp.                          | <i>Pleosporales</i>   | <i>Dittrichia viscosa</i>         |
| CF-090376 | <i>Ascochyta</i>       | sp.                          | <i>Pleosporales</i>   | <i>Ballota hirsuta</i>            |
| CF-090372 | <i>Ascochyta</i>       | sp.                          | <i>Pleosporales</i>   | <i>Sedum sediforme</i>            |
| CF-285758 | <i>Ascochyta</i>       | sp.                          | <i>Pleosporales</i>   | <i>Frankenia corymbosa</i>        |
| CF-285355 | <i>Ascochyta</i>       | sp.                          | <i>Pleosporales</i>   | <i>Asparagus horridus</i>         |
| CF-285366 | <i>Ascochyta</i>       | sp.                          | <i>Pleosporales</i>   | <i>Rosmarinus eriocalyx</i>       |
| CF-287450 | <i>Ascochyta</i>       | sp.                          | <i>Pleosporales</i>   | <i>Rosmarinus eriocalyx</i>       |
| CF-287451 | <i>Ascochyta</i>       | sp.                          | <i>Pleosporales</i>   | <i>Rosmarinus eriocalyx</i>       |
| CF-090321 | <i>Ascochyta</i>       | sp.                          | <i>Pleosporales</i>   | <i>Artemisia barrelieri</i>       |
| CF-090240 | <i>Ascochyta</i>       | sp.                          | <i>Pleosporales</i>   | <i>Genista umbellata</i>          |
| CF-090840 | <i>Ascochyta</i>       | sp.                          | <i>Pleosporales</i>   | <i>Launaea arborescens</i>        |
| CF-091945 | <i>Ascochyta</i>       | sp.                          | <i>Pleosporales</i>   | <i>Launaea arborescens</i>        |
| CF-091946 | <i>Ascochyta</i>       | sp.                          | <i>Pleosporales</i>   | <i>Lycium intricatum</i>          |
| CF-090305 | <i>Ascochyta</i>       | sp.                          | <i>Pleosporales</i>   | <i>Launaea arborescens</i>        |
| CF-090252 | <i>Ascochyta</i>       | sp.                          | <i>Pleosporales</i>   | <i>Genista umbellata</i>          |
| CF-282009 | <i>Ascorhizoctonia</i> | sp.                          | <i>Pezizales</i>      | <i>Dittrichia viscosa</i>         |
| CF-287465 | <i>Aureobasidium</i>   | <i>pullulans</i>             | <i>Dothideales</i>    | <i>Genista umbellata</i>          |
| CF-287442 | <i>Aureobasidium</i>   | <i>pullulans</i>             | <i>Dothideales</i>    | <i>Ononis fruticosa</i>           |
| CF-288910 | <i>Aureobasidium</i>   | <i>pullulans</i>             | <i>Dothideales</i>    | <i>Gypsophila tomentosa</i>       |
| CF-090316 | <i>Aureobasidium</i>   | <i>pullulans</i>             | <i>Dothideales</i>    | <i>Artemisia barrelieri</i>       |
| CF-285762 | <i>Aureobasidium</i>   | <i>pullulans subglaciale</i> | <i>Dothideales</i>    | <i>Limbarda crithmoides</i>       |
| CF-287440 | <i>Aureobasidium</i>   | sp.                          | <i>Dothideales</i>    | <i>Ononis fruticosa</i>           |
| CF-090333 | <i>Aureobasidium</i>   | sp.                          | <i>Dothideales</i>    | <i>Anthyllis cystisoides</i>      |
| CF-090336 | <i>Bactrodesmium</i>   | sp.                          | <i>Incertae sedis</i> | <i>Anthyllis cystisoides</i>      |
| CF-090812 | <i>Bartalinia</i>      | sp.                          | <i>Xylariales</i>     | <i>Limonium insigne</i>           |
| CF-285376 | <i>Basifimbria</i>     | sp.                          | <i>Xylariales</i>     | <i>Launaea arborescens</i>        |
| CF-288963 | <i>Biscogniauxia</i>   | <i>mediterranea</i>          | <i>Xylariales</i>     | <i>Tamarix canariensis</i>        |
| CF-285367 | <i>Boubovia</i>        | sp.                          | <i>Pezizales</i>      | <i>Anthyllis temiflora</i>        |
| CF-279249 | <i>Cainia</i>          | sp.                          | <i>Xylariales</i>     | <i>Retama sphaerocarpa</i>        |
| CF-090379 | <i>Camarosporium</i>   | sp.                          | <i>Pleosporales</i>   | <i>Ballota hirsuta</i>            |
| CF-090387 | <i>Camarosporium</i>   | sp.                          | <i>Pleosporales</i>   | <i>Arthrocnemum macrostachyum</i> |
| CF-285350 | <i>Camarosporium</i>   | sp.                          | <i>Pleosporales</i>   | <i>Euzomodendron bourgeanum</i>   |
| CF-090314 | <i>Camarosporium</i>   | sp.                          | <i>Pleosporales</i>   | <i>Artemisia barrelieri</i>       |
| CF-090242 | <i>Camarosporium</i>   | sp.                          | <i>Pleosporales</i>   | <i>Genista umbellata</i>          |
| CF-285770 | <i>Chaetomium</i>      | <i>crispatum</i>             | <i>Sordariales</i>    | <i>Macrosyringium longiflorum</i> |

|           |                          |                      |                        |                                            |
|-----------|--------------------------|----------------------|------------------------|--------------------------------------------|
| CF-287476 | <i>Chaetomium</i>        | sp.                  | Sordariales            | <i>Centaurea dracunculifolia</i>           |
| CF-286679 | <i>Chaetomium</i>        | sp.                  | Sordariales            | <i>Zygophyllum fabago</i>                  |
| CF-286682 | <i>Chaetothyriales</i>   | sp.                  | <i>Chaetothyriales</i> | <i>Thymelaea hirsuta</i>                   |
| CF-091931 | <i>Chaetothyriales</i>   | sp.                  | <i>Chaetothyriales</i> | <i>Tamarix canariensis</i>                 |
| CF-090214 | <i>Coleophoma</i>        | <i>cylindrospora</i> | Pleosporales           | <i>Ziziphus lotus</i>                      |
| CF-282003 | <i>Comoclathris</i>      | sp.                  | Pleosporales           | <i>Retama sphaerocarpa</i>                 |
| CF-091922 | <i>Comoclathris</i>      | sp.                  | Pleosporales           | <i>Ziziphus lotus</i>                      |
| CF-090361 | <i>Comoclathris</i>      | sp.                  | Pleosporales           | <i>Sedum sediforme</i>                     |
| CF-285379 | <i>Comoclathris</i>      | sp.                  | Pleosporales           | <i>Fagonia cretica</i>                     |
| CF-287447 | <i>Comoclathris</i>      | sp.                  | Pleosporales           | <i>Rosmarinus eriocalyx</i>                |
| CF-090301 | <i>Comoclathris</i>      | sp.                  | Pleosporales           | <i>Launaea arborescens</i>                 |
| CF-091944 | <i>Comoclathris</i>      | sp.                  | Pleosporales           | <i>Launaea arborescens</i>                 |
| CF-090266 | <i>Comoclathris</i>      | sp.                  | Pleosporales           | <i>Lygeum spartum</i>                      |
| CF-090267 | <i>Comoclathris</i>      | sp.                  | Pleosporales           | <i>Lygeum spartum</i>                      |
| CF-090792 | <i>Comoclathris</i>      | sp.                  | Pleosporales           | <i>Lygeum spartum</i>                      |
| CF-091934 | <i>Comoclathris</i>      | sp.                  | Pleosporales           | <i>Lygeum spartum</i>                      |
| CF-090763 | <i>Comoclathris</i>      | sp.                  | Pleosporales           | <i>Nerium oleander</i>                     |
| CF-090766 | <i>Comoclathris</i>      | sp.                  | Pleosporales           | <i>Nerium oleander</i>                     |
| CF-282006 | <i>Coniochaeta</i>       | <i>saccardoi</i>     | Coniochaetales         | <i>Retama sphaerocarpa</i>                 |
| CF-288927 | <i>Coniochaeta</i>       | sp.                  | Coniochaetales         | <i>Ononis tridentata</i>                   |
| CF-288956 | <i>Coniochaeta</i>       | sp.                  | Coniochaetales         | <i>Thymus zygis subs gracilis</i>          |
| CF-279239 | <i>Coniochaeta</i>       | sp.                  | Coniochaetales         | <i>Retama sphaerocarpa</i>                 |
| CF-091953 | <i>Coniothyrium</i>      | sp.                  | Pleosporales           | <i>Anthyllis cystisoides</i>               |
| CF-090330 | <i>Coniothyrium</i>      | sp.                  | Pleosporales           | <i>Cistus albidus</i>                      |
| CF-090362 | <i>Coniothyrium</i>      | sp.                  | Pleosporales           | <i>Sedum sediforme</i>                     |
| CF-285356 | <i>Coniothyrium</i>      | sp.                  | Pleosporales           | <i>Asparagus horridus</i>                  |
| CF-090243 | <i>Coniothyrium</i>      | sp.                  | Pleosporales           | <i>Genista umbellata</i>                   |
| CF-090236 | <i>Constantinomyces</i>  | sp.                  | Capnodiales            | <i>Suaeda vera</i>                         |
| CF-279244 | <i>Coprinopsis</i>       | <i>episcopalis</i>   | Agaricales             | <i>Retama sphaerocarpa</i>                 |
| CF-285465 | <i>Coprinus</i>          | <i>cinereus</i>      | Agaricales             | <i>Salsola genistoides</i>                 |
| CF-285748 | <i>Filobasidium</i>      | <i>chernovii</i>     | Tremellales            | <i>Beta macrocarpa</i>                     |
| CF-285760 | <i>Cryptococcus</i>      | sp.                  | Tremellales            | <i>Genista umbellata</i>                   |
| CF-285750 | <i>Cryptococcus</i>      | sp.                  | Tremellales            | <i>Centaurea dracunculifolia</i>           |
| CF-285752 | <i>Cryptococcus</i>      | sp.                  | Tremellales            | <i>Centaurea dracunculifolia</i>           |
| CF-285749 | <i>Paradendryphiella</i> | <i>salina</i>        | Pleosporales           | <i>Centaurea dracunculifolia</i>           |
| CF-091936 | <i>Alternaria</i>        | <i>penicillata</i>   | Pleosporales           | <i>Limonium insigne</i>                    |
| CF-285362 | <i>Dendryphion</i>       | sp.                  | Pleosporales           | <i>Asparagus horridus</i>                  |
| CF-288958 | <i>Devriesia</i>         | sp.                  | Capnodiales            | <i>Whitania frutescens</i>                 |
| CF-091918 | <i>Devriesia</i>         | sp.                  | Capnodiales            | <i>Thymelaea hirsuta</i>                   |
| CF-091923 | <i>Devriesia</i>         | sp.                  | Capnodiales            | <i>Nerium oleander</i>                     |
| CF-090344 | <i>Diaporthe</i>         | sp.                  | Diaporthales           | <i>Ononis ramosissima</i>                  |
| CF-279247 | <i>Dictyosporium</i>     | sp.                  | Pleosporales           | <i>Retama sphaerocarpa</i>                 |
| CF-288938 | <i>Didymella</i>         | sp.                  | Pleosporales           | <i>Sonchus crassifolius</i>                |
| CF-090355 | <i>Didymella</i>         | sp.                  | Pleosporales           | <i>Sedum sediforme</i>                     |
| CF-288950 | <i>Didymocytris</i>      | sp.                  | Pleosporales           | <i>Teucrium capitatum sbsp. gracillium</i> |
| CF-090768 | <i>Dimorphosporicola</i> | sp.                  | Pleosporales           | <i>Suaeda vera</i>                         |
| CF-091943 | <i>Dimorphosporicola</i> | sp.                  | Pleosporales           | <i>Suaeda vera</i>                         |
| CF-090383 | <i>Dimorphosporicola</i> | <i>traganii</i>      | Pleosporales           | <i>Arthrocnemum macrostachyum</i>          |
| CF-090749 | <i>Diplodia</i>          | sp.                  | Botryosphaerales       | <i>Thymelaea hirsuta</i>                   |
| CF-285354 | <i>Dothiora</i>          | sp.                  | Dothideales            | <i>Moricandia foetida</i>                  |
| CF-285353 | <i>Dothiora</i>          | sp.                  | Dothideales            | <i>Launaea arborescens</i>                 |
| CF-285777 | <i>Dothiorella</i>       | sp.                  | Botryosphaerales       | <i>Teucrium capitatum sbsp. gracillium</i> |
| CF-278800 | <i>Dothiorella</i>       | sp.                  | Botryosphaerales       | <i>Dittrichia viscosa</i>                  |
| CF-285759 | <i>Entodesmium</i>       | sp.                  | Pleosporales           | <i>Genista umbellata</i>                   |
| CF-288946 | <i>Epicoccum</i>         | <i>nigrum</i>        | Pleosporales           | <i>Teucrium capitatum sbsp. gracillium</i> |
| CF-285743 | <i>Epicoccum</i>         | sp.                  | Pleosporales           | <i>Atriplex glauca</i>                     |
| CF-287460 | <i>Eurotium</i>          | sp.                  | Eurotiales             | <i>Launaea arborescens</i>                 |
| CF-090213 | <i>Eutypa</i>            | <i>consobriva</i>    | Xylariales             | <i>Ziziphus lotus</i>                      |
| CF-090257 | <i>Eutypa</i>            | sp.                  | Xylariales             | <i>Asparagus horridus</i>                  |
| CF-090782 | <i>Foliophoma</i>        | sp.                  | Pleosporales           | <i>Asparagus horridus</i>                  |
| CF-090384 | <i>Fusarium</i>          | <i>equiseti</i>      | Hypocreales            | <i>Arthrocnemum macrostachyum</i>          |

|           |                          |                        |                          |                                                   |
|-----------|--------------------------|------------------------|--------------------------|---------------------------------------------------|
| CF-285462 | <i>Fusarium</i>          | <i>equiseti</i>        | <i>Hypocreales</i>       | <i>Salsola genistoides</i>                        |
| CF-288908 | <i>Fusarium</i>          | <i>redolens</i>        | <i>Hypocreales</i>       | <i>Frankenia pulvirulenta</i>                     |
| CF-285764 | <i>Fusarium</i>          | sp.                    | <i>Hypocreales</i>       | <i>Limonium insigne</i>                           |
| CF-287474 | <i>Fusarium</i>          | sp.                    | <i>Hypocreales</i>       | <i>Asparagus horridus</i>                         |
| CF-090256 | <i>Fusarium</i>          | sp.                    | <i>Hypocreales</i>       | <i>Asparagus horridus</i>                         |
| CF-090320 | <i>Hazslinszkyomyces</i> | sp.                    | <i>Pleosporales</i>      | <i>Artemisia barrelieri</i>                       |
| CF-282335 | <i>Homortomyces</i>      | <i>tamaricis</i>       | <i>Incertae sedis</i>    | <i>Dittrichia viscosa</i>                         |
| CF-090351 | <i>Hormonema</i>         | <i>carpetanum</i>      | <i>Dothideales</i>       | <i>Sedum sediforme</i>                            |
| CF-091927 | <i>Hormonema</i>         | sp.                    | <i>Dothideales</i>       | <i>Genista umbellata</i>                          |
| CF-091949 | <i>Hormonema</i>         | sp.                    | <i>Dothideales</i>       | <i>Rhamnus lycioides</i>                          |
| CF-092177 | <i>Hortaea</i>           | <i>werneckii</i>       | <i>Capnodiales</i>       | <i>Arthrocnemum macrostachyum</i>                 |
| CF-090396 | <i>Hortaea</i>           | <i>werneckii</i>       | <i>Capnodiales</i>       | <i>Chamaerops humilis</i>                         |
| CF-288947 | <i>Kabatiella</i>        | sp.                    | <i>Dothideales</i>       | <i>Teucrium capitatum</i> sbsp. <i>gracillium</i> |
| CF-285359 | <i>Kabatiella</i>        | sp.                    | <i>Dothideales</i>       | <i>Asparagus horridus</i>                         |
| CF-091935 | <i>Kabatiella</i>        | sp.                    | <i>Dothideales</i>       | <i>Limonium insigne</i>                           |
| CF-090299 | <i>Kabatiella</i>        | sp.                    | <i>Dothideales</i>       | <i>Launaea arborescens</i>                        |
| CF-090814 | <i>Kabatiella</i>        | sp.                    | <i>Dothideales</i>       | <i>Limonium insigne</i>                           |
| CF-091181 | <i>Kalmusia</i>          | sp.                    | <i>Pleosporales</i>      | <i>Asparagus horridus</i>                         |
| CF-287452 | <i>Keissieriella</i>     | sp.                    | <i>Pleosporales</i>      | <i>Rosmarinus eriocalyx</i>                       |
| CF-285360 | <i>Knufia</i>            | sp.                    | <i>Incertae sedis</i>    | <i>Asparagus horridus</i>                         |
| CF-285361 | <i>Knufia</i>            | sp.                    | <i>Incertae sedis</i>    | <i>Asparagus horridus</i>                         |
| CF-285464 | <i>Lapidomyces</i>       | sp.                    | <i>Capnodiales</i>       | <i>Fagonia cretica</i>                            |
| CF-090797 | <i>Lapidomyces</i>       | sp.                    | <i>Capnodiales</i>       | <i>Lygeum spartum</i>                             |
| CF-287444 | <i>Lasiobolidium</i>     | <i>orbiculoides</i>    | <i>Pezizales</i>         | <i>Otanthus maritimus</i>                         |
| CF-279246 | <i>Lecythophora</i>      | sp.                    | <i>Coniochaetales</i>    | <i>Retama sphaerocarpa</i>                        |
| CF-090357 | <i>Leptosphaeria</i>     | <i>hispanica</i>       | <i>Pleosporales</i>      | <i>Sedum sediforme</i>                            |
| CF-279243 | <i>Leptospora</i>        | sp.                    | <i>Incertae sedis</i>    | <i>Retama sphaerocarpa</i>                        |
| CF-090382 | <i>Libertasomyces</i>    | sp.                    | <i>Pleosporales</i>      | <i>Ballota hirsuta</i>                            |
| CF-092175 | <i>Libertasomyces</i>    | sp.                    | <i>Pleosporales</i>      | <i>Ballota hirsuta</i>                            |
| CF-092176 | <i>Libertasomyces</i>    | sp.                    | <i>Pleosporales</i>      | <i>Ballota hirsuta</i>                            |
| CF-090297 | <i>Lophiostoma</i>       | sp.                    | <i>Pleosporales</i>      | <i>Thymus hyemalis</i>                            |
| CF-090828 | <i>Lophiostoma</i>       | sp.                    | <i>Pleosporales</i>      | <i>Thymus hyemalis</i>                            |
| CF-282004 | <i>Lophotrichus</i>      | sp.                    | <i>Microascales</i>      | <i>Retama sphaerocarpa</i>                        |
| CF-285351 | <i>Masarina</i>          | sp.                    | <i>Botryosphaeriales</i> | <i>Ziziphus lotus</i>                             |
| CF-285371 | <i>Microascus</i>        | <i>trigonosporus</i>   | <i>Microascales</i>      | <i>Anabasis articulata</i>                        |
| CF-279241 | <i>Coniothyrium</i>      | <i>olivaceum</i>       | <i>Pleosporales</i>      | <i>Retama sphaerocarpa</i>                        |
| CF-090371 | <i>Morinia</i>           | <i>pestalozzioides</i> | <i>Amphisphaeriales</i>  | <i>Sedum sediforme</i>                            |
| CF-090313 | <i>Morinia</i>           | sp.                    | <i>Xylariales</i>        | <i>Artemisia barrelieri</i>                       |
| CF-285778 | <i>Albifimbria</i>       | <i>verrucaria</i>      | <i>Hypocreales</i>       | <i>Thymus hyemalis</i>                            |
| CF-282342 | <i>Nemania</i>           | sp.                    | <i>Xylariales</i>        | <i>Dittrichia viscosa</i>                         |
| CF-285348 | <i>Neocamarosporium</i>  | <i>chicastinanum</i>   | <i>Pleosporales</i>      | <i>Salsola papillosa</i>                          |
| CF-285352 | <i>Neocamarosporium</i>  | sp.                    | <i>Pleosporales</i>      | <i>Atriplex glauca</i>                            |
| CF-285744 | <i>Neocamarosporium</i>  | sp.                    | <i>Pleosporales</i>      | <i>Atriplex glauca</i>                            |
| CF-285745 | <i>Neocamarosporium</i>  | sp.                    | <i>Pleosporales</i>      | <i>Atriplex glauca</i>                            |
| CF-285746 | <i>Neocamarosporium</i>  | sp.                    | <i>Pleosporales</i>      | <i>Atriplex glauca</i>                            |
| CF-285747 | <i>Neocamarosporium</i>  | sp.                    | <i>Pleosporales</i>      | <i>Beta macrocarpa</i>                            |
| CF-288928 | <i>Neocamarosporium</i>  | sp.                    | <i>Pleosporales</i>      | <i>Salsola vermiculata</i>                        |
| CF-288930 | <i>Neocamarosporium</i>  | sp.                    | <i>Pleosporales</i>      | <i>Salsola vermiculata</i>                        |
| CF-288932 | <i>Neocamarosporium</i>  | sp.                    | <i>Pleosporales</i>      | <i>Salsola vermiculata</i>                        |
| CF-288934 | <i>Neocamarosporium</i>  | sp.                    | <i>Pleosporales</i>      | <i>Salsola vermiculata</i>                        |
| CF-285775 | <i>Neocamarosporium</i>  | sp.                    | <i>Pleosporales</i>      | <i>Suaeda vera</i>                                |
| CF-288962 | <i>Neocamarosporium</i>  | sp.                    | <i>Pleosporales</i>      | <i>Arthrocnemum macrostachyum</i>                 |
| CF-090335 | <i>Neocamarosporium</i>  | sp.                    | <i>Pleosporales</i>      | <i>Anthyllis cystisoides</i>                      |
| CF-090390 | <i>Neocamarosporium</i>  | sp.                    | <i>Pleosporales</i>      | <i>Arthrocnemum macrostachyum</i>                 |
| CF-090392 | <i>Neocamarosporium</i>  | sp.                    | <i>Pleosporales</i>      | <i>Arthrocnemum macrostachyum</i>                 |
| CF-090393 | <i>Neocamarosporium</i>  | sp.                    | <i>Pleosporales</i>      | <i>Arthrocnemum macrostachyum</i>                 |
| CF-090394 | <i>Neocamarosporium</i>  | sp.                    | <i>Pleosporales</i>      | <i>Arthrocnemum macrostachyum</i>                 |
| CF-090399 | <i>Neocamarosporium</i>  | sp.                    | <i>Pleosporales</i>      | <i>Chamaerops humilis</i>                         |
| CF-285349 | <i>Neocamarosporium</i>  | sp.                    | <i>Pleosporales</i>      | <i>Anabasis articulata</i>                        |
| CF-285368 | <i>Neocamarosporium</i>  | sp.                    | <i>Pleosporales</i>      | <i>Anabasis articulata</i>                        |
| CF-285372 | <i>Neocamarosporium</i>  | sp.                    | <i>Pleosporales</i>      | <i>Anabasis articulata</i>                        |

|           |                            |                     |                         |                                                   |
|-----------|----------------------------|---------------------|-------------------------|---------------------------------------------------|
| CF-285373 | <i>Neocamarosporium</i>    | sp.                 | <i>Pleosporales</i>     | <i>Salsola papillosa</i>                          |
| CF-285374 | <i>Neocamarosporium</i>    | sp.                 | <i>Pleosporales</i>     | <i>Salsola papillosa</i>                          |
| CF-285377 | <i>Neocamarosporium</i>    | sp.                 | <i>Pleosporales</i>     | <i>Suaeda vera</i>                                |
| CF-090284 | <i>Neocamarosporium</i>    | sp.                 | <i>Pleosporales</i>     | <i>Salicornia ramossissima</i>                    |
| CF-090228 | <i>Neocamarosporium</i>    | sp.                 | <i>Pleosporales</i>     | <i>Suaeda vera</i>                                |
| CF-090759 | <i>Neocamarosporium</i>    | sp.                 | <i>Pleosporales</i>     | <i>Nerium oleander</i>                            |
| CF-090841 | <i>Neocamarosporium</i>    | sp.                 | <i>Pleosporales</i>     | <i>Salsola genistoides</i>                        |
| CF-090842 | <i>Neocamarosporium</i>    | sp.                 | <i>Pleosporales</i>     | <i>Salsola genistoides</i>                        |
| CF-090843 | <i>Neocamarosporium</i>    | sp.                 | <i>Pleosporales</i>     | <i>Salsola genistoides</i>                        |
| CF-090227 | <i>Neocamarosporium</i>    | sp.                 | <i>Pleosporales</i>     | <i>Suaeda vera</i>                                |
| CF-090309 | <i>Neocamarosporium</i>    | sp.                 | <i>Pleosporales</i>     | <i>Suaeda vera</i>                                |
| CF-090312 | <i>Neocamarosporium</i>    | sp.                 | <i>Pleosporales</i>     | <i>Suaeda vera</i>                                |
| CF-090773 | <i>Neocamarosporium</i>    | sp.                 | <i>Pleosporales</i>     | <i>Genista umbellata</i>                          |
| CF-090824 | <i>Neocamarosporium</i>    | sp.                 | <i>Pleosporales</i>     | <i>Thymus hyemalis</i>                            |
| CF-285768 | <i>Neocamarosporium</i>    | sp.                 | <i>Pleosporales</i>     | <i>Lycium intricatum</i>                          |
| CF-287455 | <i>Neocamarosporium</i>    | sp.                 | <i>Pleosporales</i>     | <i>Lycium intricatum</i>                          |
| CF-286681 | <i>Neodidymelliopsis</i>   | sp.                 | <i>Pleosporales</i>     | <i>Cynanchum acutum</i>                           |
| CF-090206 | <i>Neofusicoccum</i>       | <i>parvum</i>       | <i>Botryosphaerales</i> | <i>Ziziphus lotus</i>                             |
| CF-090380 | <i>Neofusicoccum</i>       | sp.                 | <i>Botryosphaerales</i> | <i>Ballota hirsuta</i>                            |
| CF-285742 | <i>Neomicrosphaeropsis</i> | sp.                 | <i>Pleosporales</i>     | <i>Arthrocnemum macrostachyum</i>                 |
| CF-288941 | <i>Neomicrosphaeropsis</i> | sp.                 | <i>Pleosporales</i>     | <i>Tamarix canariensis</i>                        |
| CF-288942 | <i>Neomicrosphaeropsis</i> | sp.                 | <i>Pleosporales</i>     | <i>Tamarix canariensis</i>                        |
| CF-288943 | <i>Neomicrosphaeropsis</i> | sp.                 | <i>Pleosporales</i>     | <i>Tamarix canariensis</i>                        |
| CF-288907 | <i>Neomicrosphaeropsis</i> | sp.                 | <i>Pleosporales</i>     | <i>Frankenia pulvirulenta</i>                     |
| CF-285741 | <i>Neomicrosphaeropsis</i> | sp.                 | <i>Pleosporales</i>     | <i>Arthrocnemum macrostachyum</i>                 |
| CF-288902 | <i>Neomicrosphaeropsis</i> | sp.                 | <i>Pleosporales</i>     | <i>Arthrocnemum macrostachyum</i>                 |
| CF-090262 | <i>Neomicrosphaeropsis</i> | sp.                 | <i>Pleosporales</i>     | <i>Tamarix canariensis</i>                        |
| CF-090785 | <i>Neomicrosphaeropsis</i> | sp.                 | <i>Pleosporales</i>     | <i>Tamarix canariensis</i>                        |
| CF-285767 | <i>Neomicrosphaeropsis</i> | sp.                 | <i>Pleosporales</i>     | <i>Lycium intricatum</i>                          |
| CF-285780 | <i>Neosetophoma</i>        | sp.                 | <i>Pleosporales</i>     | <i>Thymelaea hirsuta</i>                          |
| CF-288948 | <i>Neosetophoma</i>        | sp.                 | <i>Pleosporales</i>     | <i>Teucrium capitatum</i> sbsp. <i>gracillium</i> |
| CF-282001 | <i>Neosetophoma</i>        | sp.                 | <i>Pleosporales</i>     | <i>Retama sphaerocarpa</i>                        |
| CF-285771 | <i>Nigrospora</i>          | sp.                 | <i>Incertae sedis</i>   | <i>Phragmites australis</i>                       |
| CF-288945 | <i>Nigrospora</i>          | sp.                 | <i>Incertae sedis</i>   | <i>Tamarix canariensis</i>                        |
| CF-287449 | <i>Orbicula</i>            | sp.                 | <i>Pezizales</i>        | <i>Rosmarinus eriocalyx</i>                       |
| CF-090248 | <i>Paracamarosporium</i>   | sp.                 | <i>Pleosporales</i>     | <i>Genista umbellata</i>                          |
| CF-285765 | <i>Paraconiothyrium</i>    | sp.                 | <i>Pleosporales</i>     | <i>Lygeum spartum</i>                             |
| CF-282005 | <i>Pezizales</i>           | sp.                 | <i>Pezizales</i>        | <i>Retama sphaerocarpa</i>                        |
| CF-282011 | <i>Pezizales</i>           | sp.                 | <i>Pezizales</i>        | <i>Dittrichia viscosa</i>                         |
| CF-282336 | <i>Pezizales</i>           | sp.                 | <i>Pezizales</i>        | <i>Dittrichia viscosa</i>                         |
| CF-285776 | <i>Phaeosphaeria</i>       | sp.                 | <i>Pleosporales</i>     | <i>Teucrium capitatum</i> sbsp. <i>gracillium</i> |
| CF-285779 | <i>Phaeosphaeria</i>       | sp.                 | <i>Pleosporales</i>     | <i>Thymus zygis</i> subs <i>gracilis</i>          |
| CF-285363 | <i>Phaeosphaeria</i>       | sp.                 | <i>Pleosporales</i>     | <i>Moricandia foetida</i>                         |
| CF-288952 | <i>Phaeosphaeria</i>       | sp.                 | <i>Pleosporales</i>     | <i>Teucrium capitatum</i> sbsp. <i>gracillium</i> |
| CF-282010 | <i>Phaeosphaeria</i>       | sp.                 | <i>Pleosporales</i>     | <i>Dittrichia viscosa</i>                         |
| CF-285358 | <i>Phaeotheca</i>          | <i>triangularis</i> | <i>Capnodiales</i>      | <i>Asparagus horridus</i>                         |
| CF-278520 | <i>Phoma</i>               | sp.                 | <i>Pleosporales</i>     | <i>Opuntia ficus-indica</i>                       |
| CF-288912 | <i>Phoma</i>               | sp.                 | <i>Pleosporales</i>     | <i>Gypsophila tomentosa</i>                       |
| CF-288915 | <i>Phoma</i>               | sp.                 | <i>Pleosporales</i>     | <i>Lepidium subulatum</i>                         |
| CF-288914 | <i>Phoma</i>               | sp.                 | <i>Pleosporales</i>     | <i>Lepidium subulatum</i>                         |
| CF-288919 | <i>Phoma</i>               | sp.                 | <i>Pleosporales</i>     | <i>Ononis tridentata</i>                          |
| CF-288917 | <i>Phoma</i>               | sp.                 | <i>Pleosporales</i>     | <i>Lygeum spartum</i>                             |
| CF-288953 | <i>Phoma</i>               | sp.                 | <i>Pleosporales</i>     | <i>Thymus zygis</i> subs <i>gracilis</i>          |
| CF-092178 | <i>Phoma</i>               | sp.                 | <i>Pleosporales</i>     | <i>Chamaerops humilis</i>                         |
| CF-285365 | <i>Phoma</i>               | sp.                 | <i>Pleosporales</i>     | <i>Rosmarinus eriocalyx</i>                       |
| CF-091947 | <i>Phoma</i>               | sp.                 | <i>Pleosporales</i>     | <i>Suaeda vera</i>                                |
| CF-090323 | <i>Phoma</i>               | sp.                 | <i>Pleosporales</i>     | <i>Artemisia barrelieri</i>                       |
| CF-092164 | <i>Phoma</i>               | sp.                 | <i>Pleosporales</i>     | <i>Lygeum spartum</i>                             |
| CF-090291 | <i>Phoma</i>               | sp.                 | <i>Pleosporales</i>     | <i>Thymus hyemalis</i>                            |
| CF-090829 | <i>Phoma</i>               | sp.                 | <i>Pleosporales</i>     | <i>Thymus hyemalis</i>                            |
| CF-090223 | <i>Phomopsis</i>           | sp.                 | <i>Diaporthales</i>     | <i>Ziziphus lotus</i>                             |

|           |                            |                    |                         |                                   |
|-----------|----------------------------|--------------------|-------------------------|-----------------------------------|
| CF-285364 | <i>Pleiochaeta</i>         | sp.                | <i>Incertae sedis</i>   | <i>Moricandia foetida</i>         |
| CF-288936 | <i>Pleospora</i>           | <i>herbarum</i>    | <i>Pleosporales</i>     | <i>Sonchus crassifolius</i>       |
| CF-285761 | <i>Pleospora</i>           | <i>herbarum</i>    | <i>Pleosporales</i>     | <i>Limbarda crithmoides</i>       |
| CF-090249 | <i>Pleospora</i>           | <i>herbarum</i>    | <i>Pleosporales</i>     | <i>Genista umbellata</i>          |
| CF-090771 | <i>Pleospora</i>           | <i>herbarum</i>    | <i>Pleosporales</i>     | <i>Genista umbellata</i>          |
| CF-090753 | <i>Pleospora</i>           | sp.                | <i>Pleosporales</i>     | <i>Ziziphus lotus</i>             |
| CF-090826 | <i>Pleospora</i>           | sp.                | <i>Pleosporales</i>     | <i>Thymus hyemalis</i>            |
| CF-091933 | <i>Pleospora</i>           | sp.                | <i>Pleosporales</i>     | <i>Lygeum spartum</i>             |
| CF-282343 | <i>Podospora</i>           | <i>pleiospora</i>  | <i>Sordariales</i>      | <i>Dittrichia viscosa</i>         |
| CF-285369 | <i>Schizothecium</i>       | <i>tetrasporum</i> | <i>Sordariales</i>      | <i>Anabasis articulata</i>        |
| CF-288933 | <i>Preussia</i>            | <i>australis</i>   | <i>Pleosporales</i>     | <i>Salsola vermiculata</i>        |
| CF-285375 | <i>Preussia</i>            | <i>australis</i>   | <i>Pleosporales</i>     | <i>Launaea arborescens</i>        |
| CF-091940 | <i>Preussia</i>            | <i>australis</i>   | <i>Pleosporales</i>     | <i>Thymus hyemalis</i>            |
| CF-285772 | <i>Preussia</i>            | <i>grandispora</i> | <i>Pleosporales</i>     | <i>Phragmites australis</i>       |
| CF-285773 | <i>Preussia</i>            | <i>grandispora</i> | <i>Pleosporales</i>     | <i>Phragmites australis</i>       |
| CF-090838 | <i>Preussia</i>            | <i>grandispora</i> | <i>Pleosporales</i>     | <i>Launaea arborescens</i>        |
| CF-091941 | <i>Preussia</i>            | <i>grandispora</i> | <i>Pleosporales</i>     | <i>Thymus hyemalis</i>            |
| CF-282339 | <i>Preussia</i>            | <i>lignicola</i>   | <i>Pleosporales</i>     | <i>Dittrichia viscosa</i>         |
| CF-090241 | <i>Preussia</i>            | <i>lignicola</i>   | <i>Pleosporales</i>     | <i>Genista umbellata</i>          |
| CF-090293 | <i>Preussia</i>            | <i>lignicola</i>   | <i>Pleosporales</i>     | <i>Thymus hyemalis</i>            |
| CF-285357 | <i>Preussia</i>            | <i>similis</i>     | <i>Pleosporales</i>     | <i>Asparagus horridus</i>         |
| CF-288918 | <i>Preussia</i>            | sp.                | <i>Pleosporales</i>     | <i>Lygeum spartum</i>             |
| CF-288931 | <i>Preussia</i>            | sp.                | <i>Pleosporales</i>     | <i>Salsola vermiculata</i>        |
| CF-288906 | <i>Preussia</i>            | sp.                | <i>Pleosporales</i>     | <i>Arthrocnemum macrostachyum</i> |
| CF-279766 | <i>Preussia</i>            | sp.                | <i>Pleosporales</i>     | <i>Retama sphaerocarpa</i>        |
| CF-287459 | <i>Preussia</i>            | sp.                | <i>Pleosporales</i>     | <i>Launaea arborescens</i>        |
| CF-285370 | <i>Preussia</i>            | sp.                | <i>Pleosporales</i>     | <i>Anabasis articulata</i>        |
| CF-285378 | <i>Preussia</i>            | sp.                | <i>Pleosporales</i>     | <i>Salsola oppositifolia</i>      |
| CF-090835 | <i>Preussia</i>            | sp.                | <i>Pleosporales</i>     | <i>Thymus hyemalis</i>            |
| CF-090338 | <i>Pseudocamarosporium</i> | sp.                | <i>Pleosporales</i>     | <i>Anthyllis cystisoides</i>      |
| CF-285347 | <i>Pseudocamarosporium</i> | sp.                | <i>Pleosporales</i>     | <i>Helianthemum almeriense</i>    |
| CF-090324 | <i>Pseudocamarosporium</i> | sp.                | <i>Pleosporales</i>     | <i>Artemisia barrelieri</i>       |
| CF-285753 | <i>Pseudodiplodia</i>      | <i>ruticola</i>    | <i>Botryosphaerales</i> | <i>Cynanchum acutum</i>           |
| CF-285754 | <i>Pseudodiplodia</i>      | <i>ruticola</i>    | <i>Botryosphaerales</i> | <i>Cynanchum acutum</i>           |
| CF-285755 | <i>Pseudodiplodia</i>      | <i>ruticola</i>    | <i>Botryosphaerales</i> | <i>Cynanchum acutum</i>           |
| CF-285756 | <i>Pseudodiplodia</i>      | sp.                | <i>Botryosphaerales</i> | <i>Cynanchum acutum</i>           |
| CF-279245 | <i>Pseudopithomyces</i>    | <i>chartarum</i>   | <i>Pleosporales</i>     | <i>Retama sphaerocarpa</i>        |
| CF-287448 | <i>Pseudoseptoria</i>      | <i>obscura</i>     | <i>Dothideales</i>      | <i>Rosmarinus eriocalyx</i>       |
| CF-281030 | <i>Pulvinula</i>           | sp.                | <i>Pezizales</i>        | <i>Retama sphaerocarpa</i>        |
| CF-287464 | <i>Pyrenochaeta</i>        | sp.                | <i>Pleosporales</i>     | <i>Genista umbellata</i>          |
| CF-090337 | <i>Rhizoctonia</i>         | sp.                | <i>Cantharellales</i>   | <i>Anthyllis cystisoides</i>      |
| CF-287466 | <i>Rosellinia</i>          | sp.                | <i>Xylariales</i>       | <i>Artemisia barrelieri</i>       |
| CF-285766 | <i>Sclerostagonospora</i>  | sp.                | <i>Pleosporales</i>     | <i>Lygeum spartum</i>             |
| CF-090364 | <i>Seiridium</i>           | sp.                | <i>Amphisphaerales</i>  | <i>Sedum sediforme</i>            |
| CF-285463 | <i>Selenophoma</i>         | <i>juncea</i>      | <i>Dothideales</i>      | <i>Salsola oppositifolia</i>      |
| CF-285774 | <i>Selenophoma</i>         | <i>juncea</i>      | <i>Dothideales</i>      | <i>Salsola oppositifolia</i>      |
| CF-277101 | <i>Selenophoma</i>         | sp.                | <i>Dothideales</i>      | <i>Spartium junceum</i>           |
| CF-090317 | <i>Selenophoma</i>         | sp.                | <i>Dothideales</i>      | <i>Artemisia barrelieri</i>       |
| CF-285346 | <i>Septoria</i>            | <i>arundinacea</i> | <i>Capnodiales</i>      | <i>Phragmites australis</i>       |
| CF-285751 | <i>Septoria</i>            | sp.                | <i>Capnodiales</i>      | <i>Centaurea dracunculifolia</i>  |
| CF-090353 | <i>Lepteutypa</i>          | <i>cupressi</i>    | <i>Xylariales</i>       | <i>Sedum sediforme</i>            |
| CF-287457 | <i>Setomelanomma</i>       | sp.                | <i>Pleosporales</i>     | <i>Lycium intricatum</i>          |
| CF-288954 | <i>Sordaria</i>            | sp.                | <i>Sordariales</i>      | <i>Thymus zygis subs gracilis</i> |
| CF-090778 | <i>Stagnospora</i>         | sp.                | <i>Pleosporales</i>     | <i>Asparagus horridus</i>         |
| CF-281556 | <i>Stagnospora</i>         | sp.                | <i>Pleosporales</i>     | <i>Stipa tenacissima</i>          |
| CF-090378 | <i>Stagnospora</i>         | sp.                | <i>Pleosporales</i>     | <i>Ballota hirsuta</i>            |
| CF-090359 | <i>Stagnospora</i>         | sp.                | <i>Pleosporales</i>     | <i>Sedum sediforme</i>            |
| CF-090235 | <i>Stagnospora</i>         | sp.                | <i>Pleosporales</i>     | <i>Suaeda vera</i>                |
| CF-090258 | <i>Stagnospora</i>         | sp.                | <i>Pleosporales</i>     | <i>Asparagus horridus</i>         |
| CF-090776 | <i>Stemphylium</i>         | sp.                | <i>Pleosporales</i>     | <i>Genista umbellata</i>          |
| CF-090346 | <i>Stemphylium</i>         | sp.                | <i>Pleosporales</i>     | <i>Ononis ramosissima</i>         |

|           |                            |               |                       |                                   |
|-----------|----------------------------|---------------|-----------------------|-----------------------------------|
| CF-090850 | <i>Stemphylium</i>         | sp.           | <i>Pleosporales</i>   | <i>Ononis ramosissima</i>         |
| CF-090781 | <i>Stemphylium</i>         | sp.           | <i>Pleosporales</i>   | <i>Asparagus horridus</i>         |
| CF-090250 | <i>Stemphylium</i>         | sp.           | <i>Pleosporales</i>   | <i>Genista umbellata</i>          |
| CF-090279 | <i>Tamaricicola</i>        | sp.           | <i>Pleosporales</i>   | <i>Limonium insigne</i>           |
| CF-288916 | <i>Tamaricicola</i>        | sp.           | <i>Pleosporales</i>   | <i>Limonium majus</i>             |
| CF-288959 | <i>Tamaricicola</i>        | sp.           | <i>Pleosporales</i>   | <i>Limonium majus</i>             |
| CF-091926 | <i>Teratosphaeria</i>      | sp.           | <i>Capnodiales</i>    | <i>Genista umbellata</i>          |
| CF-090304 | <i>Teratosphaeria</i>      | sp.           | <i>Capnodiales</i>    | <i>Launaea arborescens</i>        |
| CF-287456 | <i>Teratosphaeria</i>      | sp.           | <i>Capnodiales</i>    | <i>Lycium intricatum</i>          |
| CF-091928 | <i>Toxicocladosporium</i>  | sp.           | <i>Capnodiales</i>    | <i>Asparagus horridus</i>         |
| CF-277739 | <i>Trichothecium</i>       | <i>roseum</i> | <i>Hypocreales</i>    | <i>Retama sphaerocarpa</i>        |
| CF-285757 | <i>Trichothecium</i>       | <i>roseum</i> | <i>Hypocreales</i>    | <i>Dorycnium pentaphyllum</i>     |
| CF-282017 | <i>Tympanis</i>            | sp.           | <i>Helotiales</i>     | <i>Juniperus oxycedrus</i>        |
| CF-290943 | <i>Unidentified</i>        | Fungus        | <i>not determined</i> | <i>Genista umbellata</i>          |
| CF-290928 | <i>Unidentified</i>        | Fungus        | <i>not determined</i> | <i>Limodorum abortivum</i>        |
| CF-290929 | <i>Unidentified</i>        | Fungus        | <i>not determined</i> | <i>Limodorum abortivum</i>        |
| CF-290937 | <i>Unidentified</i>        | Fungus        | <i>not determined</i> | <i>Retama sphaerocarpa</i>        |
| CF-287441 | <i>Unidentified</i>        | Fungus        | <i>not determined</i> | <i>Ononis fruticosa</i>           |
| CF-288924 | <i>Unidentified</i>        | Fungus        | <i>not determined</i> | <i>Ononis tridentata</i>          |
| CF-288925 | <i>Unidentified</i>        | Fungus        | <i>not determined</i> | <i>Ononis tridentata</i>          |
| CF-287475 | <i>Unidentified</i>        | Fungus        | <i>not determined</i> | <i>Centaurea dracunculifolia</i>  |
| CF-090748 | <i>Unidentified</i>        | Fungus        | <i>not determined</i> | <i>Thymelaea hirsuta</i>          |
| CF-090210 | <i>Unidentified</i>        | Fungus        | <i>not determined</i> | <i>Ziziphus lotus</i>             |
| CF-090222 | <i>Unidentified</i>        | Fungus        | <i>not determined</i> | <i>Ziziphus lotus</i>             |
| CF-090758 | <i>Unidentified</i>        | Fungus        | <i>not determined</i> | <i>Ziziphus lotus</i>             |
| CF-282344 | <i>Unidentified</i>        | Fungus        | <i>not determined</i> | <i>Dittrichia viscosa</i>         |
| CF-092179 | <i>Unidentified</i>        | Fungus        | <i>not determined</i> | <i>Nicotiana glauca</i>           |
| CF-091954 | <i>Unidentified</i>        | Fungus        | <i>not determined</i> | <i>Ononis ramosissima</i>         |
| CF-091948 | <i>Unidentified</i>        | Fungus        | <i>not determined</i> | <i>Cistus albidus</i>             |
| CF-287472 | <i>Unidentified</i>        | Fungus        | <i>not determined</i> | <i>Asparagus horridus</i>         |
| CF-090273 | <i>Unidentified</i>        | Fungus        | <i>not determined</i> | <i>Limonium insigne</i>           |
| CF-091924 | <i>Unidentified</i>        | Fungus        | <i>not determined</i> | <i>Nerium oleander</i>            |
| CF-091929 | <i>Unidentified</i>        | Fungus        | <i>not determined</i> | <i>Tamarix canariensis</i>        |
| CF-285763 | <i>Ustilago</i>            | sp.           | <i>Ustilaginales</i>  | <i>Launaea arborescens</i>        |
| CF-090221 | <i>Verrucocladosporium</i> | sp.           | <i>Capnodiales</i>    | <i>Ziziphus lotus</i>             |
| CF-279251 | <i>Volutella</i>           | sp.           | <i>Hypocreales</i>    | <i>Retama sphaerocarpa</i>        |
| CF-288937 | <i>Xenodidymella</i>       | sp.           | <i>Pleosporales</i>   | <i>Sonchus crassifolius</i>       |
| CF-288955 | <i>Xenodidymella</i>       | sp.           | <i>Pleosporales</i>   | <i>Thymus zygis subs gracilis</i> |
| CF-288957 | <i>Xenodidymella</i>       | sp.           | <i>Pleosporales</i>   | <i>Thymus zygis subs gracilis</i> |
| CF-090345 | <i>Xenodidymella</i>       | sp.           | <i>Pleosporales</i>   | <i>Ononis ramosissima</i>         |
| CF-092173 | <i>Xenodidymella</i>       | sp.           | <i>Pleosporales</i>   | <i>Ballota hirsuta</i>            |
| CF-290936 | <i>Xylaria</i>             | sp.           | <i>Xylariales</i>     | <i>Retama sphaerocarpa</i>        |
| CF-286680 | <i>Xylaria</i>             | sp.           | <i>Xylariales</i>     | <i>Lygeum spartum</i>             |
| CF-287438 | <i>Xylaria</i>             | sp.           | <i>Xylariales</i>     | <i>Ononis fruticosa</i>           |
| CF-091951 | <i>Xylaria</i>             | sp.           | <i>Xylariales</i>     | <i>Rhamnus lycioides</i>          |
| CF-285461 | <i>Xylaria</i>             | sp.           | <i>Xylariales</i>     | <i>Thymelaea hirsuta</i>          |
| CF-090770 | <i>Xylaria</i>             | sp.           | <i>Xylariales</i>     | <i>Genista umbellata</i>          |



**Supplementary Table 2.** Fungal strains included in the phylogenetic analysis (**newly isolated strains** from plants collected in arid zones of Andalucía are **in bold**).

| Species                               | Strain code <sup>a</sup> | Substrate                       | Origin                                      | Genbank accession numbers <sup>b</sup> |          |
|---------------------------------------|--------------------------|---------------------------------|---------------------------------------------|----------------------------------------|----------|
|                                       |                          |                                 |                                             | ITS                                    | 28S      |
| <b>Cryptococcus sp.</b>               | <b>CF-285748</b>         | <b>Beta macrocarpa</b>          | <b>El Margen salt marsh, Granada, Spain</b> | <b>MG065727</b>                        |          |
| <b>Coniothyrium sp.</b>               | <b>CF-091953</b>         | <b>Anthyllis cihroides</b>      | <b>Sierra Alhamilla, Almeria, Spain</b>     | <b>MG065728</b>                        |          |
| <b>Coniothyrium sp.</b>               | <b>CF-090243</b>         | <b>Genista umbellata</b>        | <b>Tabernas desert, Almeria, Spain</b>      | <b>MG065729</b>                        |          |
| <i>Coniothyrium palmarum</i>          | CBS 400.71               | <i>Chamaerops humilis</i>       | Italy                                       | AY720708                               | JX681084 |
| <i>Coniothyrium carteri</i>           | CBS 105.91               | <i>Quercus robur</i>            | Germany                                     | JF740181                               | KF251712 |
| <b>Coniothyrium sp.</b>               | <b>CF-090330</b>         | <b>Cistus albidus</b>           | <b>Sierra Alhamilla, Almeria, Spain</b>     | <b>MG065730</b>                        |          |
| <b>Coniothyrium sp.</b>               | <b>CF-090362</b>         | <b>Sedum sediforme</b>          | <b>Sierra Alhamilla, Almeria, Spain</b>     | <b>MG065731</b>                        |          |
| <i>Coniothyrium multiporum</i>        | CBS 353.65               | saline soil                     | India                                       | JF740187                               | JF740268 |
| <i>Coniothyrium telephii</i>          | CBS 188.71               | air                             | Filand                                      | JF740188                               | GQ387599 |
| <i>Fungal endophyte</i>               | SNP 431                  | <i>Parkinsonia microphylla</i>  | Saguaro National Park, Arizona, USA         | KP335607                               |          |
| <b>Coniothyrium sp.</b>               | <b>CF-285356</b>         | <b>Asparagus horridus</b>       | <b>Tabernas desert, Almeria, Spain</b>      | <b>MG065732</b>                        |          |
| <i>Hazslinszkyomyces aloes</i>        | CBS 136437               | <i>Aloe dichotoma</i>           | Western Cape Province, South Africa         | KF777142                               |          |
| <b>Hazslinszkyomyces sp.</b>          | <b>CF-090320</b>         | <b>Artemisia sp.</b>            | <b>Tabernas desert, Almeria, Spain</b>      | <b>MG065733</b>                        |          |
| <i>Coniothyria agaves</i>             | CBS 470.69               | <i>Agave americana</i>          | El Arenal, Mallorca, Spain                  | JX681075                               |          |
| <i>Neophaeosphaeria filamentosa</i>   | CBS 102202               | <i>Yucca rostrata</i>           | Mexico                                      | JF740259                               | GQ387577 |
| <i>Camarosporium arezzoensis</i>      | MFLUCC 14-0238           | <i>Cytisus sp.</i>              | Italy                                       | KP120926                               | KP120927 |
| <i>Camarosporium aureum</i>           | MFLUCC 14-0620           | <i>Cotinus coggygria</i>        | Russia                                      | KP744436                               | KP744478 |
| <i>Camarosporium robinicola</i>       | MFLUCC 13-0527           | <i>Robinia pseudoacacia</i>     | Italy                                       | KJ562214                               | KJ589412 |
| <i>Camarosporium uniseriatum</i>      | MFLUCC 15-0444           | <i>Celtis occidentalis</i>      | Russia                                      | KU697613                               | KU697614 |
| <b>Camarosporium sp.</b>              | <b>CF-285350</b>         | <b>Euzomodendron bourgeanum</b> | <b>Tabernas desert, Almeria, Spain</b>      | <b>MG065734</b>                        |          |
| <i>Camarosporium spartii</i>          | MFLUCC 13-0548           | <i>Cytisus sp.</i>              | Italy                                       | KJ562215                               | KJ589413 |
| <i>Camarosporium clematidis</i>       | MFLUCC 13-0336           | <i>Clematis vitalba</i>         | Italy                                       | KJ562213                               |          |
| <i>Fungal endophyte</i>               | SNP 009                  | <i>Larrea tridentata</i>        | Saguaro National Park, Arizona, USA         | KP335215                               |          |
| <b>Pseudocamarosporium sp.</b>        | <b>CF-285347</b>         | <b>Helianthemum almeriense</b>  | <b>Tabernas desert, Almeria, Spain</b>      | <b>MG065735</b>                        |          |
| <i>Pseudocamarosporium propinquum</i> | MFLUCC 13-0544           | <i>Salix sp.</i>                | Italy                                       | KJ747049                               | KJ813280 |
| <i>Pseudocamarosporium loniceræ</i>   | MFLUCC 13-0532           | <i>Lonicera sp.</i>             | Italy                                       | KJ747047                               | KJ813278 |
| <i>Pseudocamarosporium piceae</i>     | MFLUCC 14-0192           | <i>Picea excels</i>             | Italy                                       | KJ747046                               | KJ803030 |
| <i>Pseudocamarosporium tilicola</i>   | MFLUCC 13-0550           | <i>Pinus nigra</i>              | Italy                                       | KJ747050                               | KJ813281 |
| <i>Pseudocamarosporium corni</i>      | MFLUCC 13-0541           | <i>Cornus sanguinea</i>         | Italy                                       | KJ747048                               | KJ813279 |
| <b>Pseudocamarosporium sp.</b>        | <b>CF-090324</b>         | <b>Artemisia sp.</b>            | <b>Tabernas desert, Almeria, Spain</b>      | <b>MG065736</b>                        |          |
| <b>Pseudocamarosporium sp.</b>        | <b>CF-090338</b>         | <b>Anthyllis cihroides</b>      | <b>Sierra Alhamilla, Almeria, Spain</b>     | <b>MG065737</b>                        |          |
| <i>Camarosporium brabeji</i>          | CBS 123026               | <i>Protea sp.</i>               | South Africa                                | EU552105                               |          |
| <i>Paracamarosporium hawaiiensis</i>  | CBS 1200225              | <i>Sophora chrysophylla</i>     | Hawaii, USA                                 | DQ885897                               |          |
| <i>Paracamarosporium psoraleae</i>    | CBS 136628               | <i>Psoralea pinnata</i>         | Western Cape Province, South Africa         | KF777143                               | KF777199 |
| <b>Paracamarosporium sp.</b>          | <b>CF-090248</b>         | <b>Genista umbellata</b>        | <b>Tabernas desert, Almeria, Spain</b>      | <b>MG065738</b>                        |          |

|                                         |                  |                                           |                                         |                    |
|-----------------------------------------|------------------|-------------------------------------------|-----------------------------------------|--------------------|
| <i>Paramarosporium leucadendri</i>      | CBS 123027       | <i>Brabejum stellatifolium</i>            | South Africa                            | EU552106           |
| <i>Paracamarosporium tamaricis</i>      | MFLUCC 15-0495   | <i>Tamarix gallica</i>                    | Italy                                   | KU900327 KU900299  |
| <i>Paracamarosporium fagi</i>           | CPC 24892        | <i>Fagus sylvatica</i>                    | Germany                                 | KR611887 KR611905  |
| <i>Fungal endophyte</i>                 | SNP 291          | <i>Parkinsonia microphylla</i>            | Saguaro National Park, Arizona, USA     | KP335478           |
| <i>Fungal sp.</i>                       | ARIZ AZ0149      | <i>Juniperus deppeana</i>                 | Coronado National Forest, Arizona, USA  | HM122902           |
| <b><i>Camarosporium sp.</i></b>         | <b>CF-090314</b> | <b><i>Artemisia barrelieri</i></b>        | <b>Tabernas desert, Almeria, Spain</b>  | <b>MG065739</b>    |
| <i>Kalmusia sarothamni</i>              | CBS 113833       | <i>Cytisus sarothamni</i>                 | Sweden                                  | KF796675 KF796671  |
| <b><i>Kalmusia sp.</i></b>              | <b>CF-091181</b> | <b><i>Asparagus horridus</i></b>          | <b>Tabernas desert, Almeria, Spain</b>  | <b>MG065740</b>    |
| <i>Kalmusia variispora</i>              | 95SA2            | <i>Quercus brantii</i>                    | Iran                                    | KY783414 KY825094  |
| <i>Kalmusia ebuli</i>                   | CBS 123120       | <i>Populus tremula</i>                    | France                                  | KF796674           |
| <i>Kalmusia italica</i>                 | MFLUCC 13-0066   | <i>Spartium junceum</i>                   | Italy                                   | KP325440 KP325441  |
| <i>Fungal sp.</i>                       | ARIZ AZ0553      | <i>Juniperus deppeana</i>                 | Coronado National Forest, Arizona, USA  | HM123272           |
| <i>Fungal sp.</i>                       | ARIZ AZ0644      | <i>Quercus rugosa</i>                     | Coronado National Forest, Arizona, USA  | HM123362           |
| <i>Xenodidymella applanata</i>          | CBS 102634       | <i>Rubus idaeus</i>                       | Netherlands                             | GU237726 GU237997  |
| <b><i>Xenodidymella sp.</i></b>         | <b>CF-092173</b> | <b><i>Bellota hirsuta</i></b>             | <b>Sierra Alhamilla, Almeria, Spain</b> | <b>MG065741</b>    |
| <b><i>Xenodidymella sp.</i></b>         | <b>CF-090345</b> | <b><i>Onoris ramosissima</i></b>          | <b>Sierra Alhamilla, Almeria, Spain</b> | <b>MG065742</b>    |
| <b><i>Xenodidymella sp.</i></b>         | <b>CF-288955</b> | <b><i>Thymus zygis subs gracillis</i></b> | <b>El Margen salt marsh, Granada</b>    | <b>MG065743</b>    |
| <b><i>Xenodidymella sp.</i></b>         | <b>CF-288937</b> | <b><i>Sonchus crassifolius</i></b>        | <b>El Margen salt marsh, Granada</b>    | <b>MG065744</b>    |
| <i>Neodidymelliopsis cannabis</i>       | CBS 121.75       | <i>Urtica dioica</i>                      | Netherlands                             | GU237761 GU237972  |
| <i>Neodidymelliopsis xanthina</i>       | CBS 383.68       | <i>Delphinium sp.</i>                     | Netherlands                             | NR_135994 GU238157 |
| <b><i>Neodidymelliopsis sp.</i></b>     | <b>CF-286681</b> | <b><i>Cynanchum acutum</i></b>            | <b>El Margen salt marsh, Granada</b>    | <b>MG065745</b>    |
| <i>Microsphaeropsis olivacea</i>        | CBS 303.68       | <i>Ligustrum vulgare</i>                  | Netherlands                             | JX681101           |
| <i>Boeremia exigua var exigua</i>       | CBS 431.74       | <i>Solanum tuberosum</i>                  | Netherlands                             | FJ427001 JX681074  |
| <b><i>Neomicrosphaeropsis sp.</i></b>   | <b>CF-090262</b> | <b><i>Tamarix canariensis</i></b>         | <b>Tabernas desert, Almeria, Spain</b>  | <b>MG065746</b>    |
| <b><i>Neomicrosphaeropsis sp.</i></b>   | <b>CF-288942</b> | <b><i>Tamarix canariensis</i></b>         | <b>El Margen salt marsh, Granada</b>    | <b>MG065747</b>    |
| <b><i>Neomicrosphaeropsis sp.</i></b>   | <b>CF-090785</b> | <b><i>Tamarix canariensis</i></b>         | <b>Tabernas desert, Almeria, Spain</b>  | <b>MG065748</b>    |
| <i>Neomicrosphaeropsis tamaricicola</i> | MFLUCC 14-0443   | <i>Tamarix gallica</i>                    | Italy                                   | KU900322 KU729851  |
| <b><i>Neomicrosphaeropsis sp.</i></b>   | <b>CF-288902</b> | <b><i>Arthrocnemum macrostachyum</i></b>  | <b>El Margen salt marsh, Granada</b>    | <b>MG065749</b>    |
| <b><i>Neomicrosphaeropsis sp.</i></b>   | <b>CF-285742</b> | <b><i>Arthrocnemum macrostachyum</i></b>  | <b>El Margen salt marsh, Granada</b>    | <b>MG065750</b>    |
| <b><i>Neomicrosphaeropsis sp.</i></b>   | <b>CF-288907</b> | <b><i>Frankenia pulvirulenta</i></b>      | <b>El Margen salt marsh, Granada</b>    | <b>MG065751</b>    |
| <b><i>Neomicrosphaeropsis sp.</i></b>   | <b>CF-285767</b> | <b><i>Lycium intricatum</i></b>           | <b>Torre Garcia, Almeria, Spain</b>     | <b>MG065752</b>    |
| <i>Didymella exigua</i>                 | CBS 183.55       | <i>Rumex arifolius</i>                    | France                                  | NR_135936 EU754155 |
| <b><i>Didymella sp.</i></b>             | <b>CF-288938</b> | <b><i>Sonchus crassifolius</i></b>        | <b>El Margen salt marsh, Granada</b>    | <b>MG065753</b>    |
| <i>Ascochyta medicaginicola</i>         | CBS 533.66       | <i>Medicago sativa</i>                    | Netherlands                             | EU167575           |
| <i>Leptosphaerulina australis</i>       | CBS 317.83       | <i>Eugenia aromatica</i>                  | Indonesia                               | GU237829 EU754166  |
| <i>Leptosphaerulina australis</i>       | NBRC 33240       | house dust                                | Japan                                   | NBRC33240          |
| <i>Leptosphaerulina trifolii</i>        | NBRC 7250        | -                                         | -                                       | NBRC7250           |
| <i>Leptosphaerulina argentinensis</i>   | CBS 569.94       | <i>Lonicera periclymenum</i>              | Netherlands                             | AY849947           |
| <i>Ascochyta phacae</i>                 | CBS 184.55       | <i>Phaca alpina</i>                       | Switzerland                             | EU167570           |

|                                       |                  |                                                      |                                                |                   |
|---------------------------------------|------------------|------------------------------------------------------|------------------------------------------------|-------------------|
| <i>Ascochyta</i> sp.                  | CF-090372        | <i>Sedum sediforme</i>                               | Sierra Alhamilla, Almeria, Spain               | MG065754          |
| <i>Ascochyta rabiei</i>               | CBS 237.37       | <i>Cicer arietinum</i>                               | Bulgaria                                       | EU167600          |
| <i>Ascochyta</i> sp.                  | CF-090376        | <i>Bellota hirsuta</i>                               | Sierra Alhamilla, Almeria, Spain               | MG065755          |
| <i>Ascochyta</i> sp.                  | CF-090240        | <i>Genista umbellata</i>                             | Tabernas desert, Almeria, Spain                | MG065756          |
| <i>Ascochyta</i> sp.                  | CF-091946        | <i>Lycium intricatum</i>                             | Tabernas desert, Almeria, Spain                | MG065757          |
| <i>Ascochyta</i> sp.                  | CF-091945        | <i>Launaea arborescens</i>                           | Tabernas desert, Almeria, Spain                | MG065758          |
| <i>Ascochyta</i> sp.                  | CF-287439        | <i>Ononis fruticosa</i>                              | El Margen salt marsh, Granada                  | MG065759          |
| <i>Ascochyta</i> sp.                  | CF-090252        | <i>Genista umbellata</i>                             | Tabernas desert, Almeria, Spain                | MG065760          |
| <i>Ascochyta</i> sp.                  | CF-090321        | <i>Artemisia barrelieri</i>                          | Tabernas desert, Almeria, Spain                | MG065761          |
| <i>Ascochyta</i> sp.                  | CF-090305        | <i>Launaea arborescens</i>                           | Tabernas desert, Almeria, Spain                | MG065762          |
| <i>Ascochyta</i> sp.                  | CF-090840        | <i>Launaea arborescens</i>                           | Tabernas desert, Almeria, Spain                | MG065763          |
| <i>Ascochyta</i> sp.                  | CF-285366        | <i>Rosmarinus eriocalyx</i>                          | Tabernas desert, Almeria, Spain                | MG065764          |
| <i>Ascochyta</i> sp.                  | CF-285355        | <i>Asparagus horridus</i>                            | Tabernas desert, Almeria, Spain                | MG065765          |
| <i>Ascochyta</i> sp.                  | CF-287454        | <i>Rosmarinus eriocalyx</i>                          | Tabernas desert, Almeria, Spain                | MG065766          |
| <i>Ascochyta</i> sp.                  | CF-287450        | <i>Rosmarinus eriocalyx</i>                          | Tabernas desert, Almeria, Spain                | MG065767          |
| <i>Ascochyta</i> sp.                  | CF-287451        | <i>Rosmarinus eriocalyx</i>                          | Tabernas desert, Almeria, Spain                | MG065768          |
| <i>Ascochyta viciae-pannonicae</i>    | CBS 254.92       | <i>Vicia pannonica</i>                               | Czechoslovakia                                 | EU167559 KT389702 |
| <i>Ascochyta pisi</i> var <i>pisi</i> | CBS 108.26       | -                                                    | -                                              | EU167557          |
| <b><i>Phoma</i> sp.</b>               | <b>CF-092164</b> | <b><i>Lygeum spartum</i></b>                         | <b>Tabernas desert, Almeria, Spain</b>         | <b>MG065769</b>   |
| <i>Neosetophoma samarorum</i>         | CBS 139.96       | grass                                                | Netherlands                                    | FJ427062 KF251665 |
| <i>Ascomycota</i> sp.                 | ARIZ PAAsh314    | <i>Fraxinus velutina</i>                             | Arizona, USA                                   | JN120365          |
| <i>Phaeosphaeria nigrans</i>          | NBRC 33095       | <i>Phragmites karka</i>                              | Japan                                          | NBRC33095         |
| <i>Neosetophoma italica</i>           | MFLUCC 13-0388   | <i>Iris germanica</i>                                | Italy                                          | KP711356 KP711361 |
| <b><i>Neosetophoma</i> sp.</b>        | <b>CF-282001</b> | <b><i>Retama sphaerocarpa</i></b>                    | <b>Albuñuelas, Granada, Spain</b>              | <b>KU295580</b>   |
| <b><i>Neosetophoma</i> sp.</b>        | <b>CF-288948</b> | <b><i>Teucrium pollium</i> sbs <i>gracillium</i></b> | <b>El Margen salt marsh, Granada</b>           | <b>MG065770</b>   |
| <b><i>Phoma</i> sp.</b>               | <b>CF-090323</b> | <b><i>Artemisia barrelieri</i></b>                   | <b>Tabernas desert, Almeria, Spain</b>         | <b>MG065771</b>   |
| <b><i>Phoma</i> sp.</b>               | <b>CF-091947</b> | <b><i>Suaeda vera</i></b>                            | <b>Tabernas desert, Almeria, Spain</b>         | <b>MG065772</b>   |
| <i>Pyrenochaeta lycopersici</i>       | CBS 267.59       | <i>Lycopersicon esculentum</i>                       | Netherlands                                    | JF740261 GQ387612 |
| <i>Foliophoma fallens</i>             | CBS 167.78       | <i>Olea europaea</i>                                 | New Zealand                                    | KY940772 GU238074 |
| <b><i>Foliophoma fallens</i></b>      | <b>CF-090782</b> | <b><i>Asparagus horridus</i></b>                     | <b>Tabernas desert, Almeria, Spain</b>         | <b>MG065773</b>   |
| <b><i>Libertasomyces</i> sp.</b>      | <b>CF-090382</b> | <b><i>Bellota hirsuta</i></b>                        | <b>Sierra Alhamilla, Almeria, Spain</b>        | <b>MG065774</b>   |
| <b><i>Libertasomyces</i> sp.</b>      | <b>CF-092175</b> | <b><i>Bellota hirsuta</i></b>                        | <b>Sierra Alhamilla, Almeria, Spain</b>        | <b>MG065775</b>   |
| <i>Libertasomyces platani</i>         | CPC 29609        | <i>Platanus</i> sp.                                  | New Zealand                                    | KY173416 KY173507 |
| <i>Libertasomyces myopori</i>         | CPC 27354        | <i>Myoporum serratum</i>                             | South Africa                                   | KX228281 KX228332 |
| <i>Libertasomyces</i> sp.             | CF-092176        | <i>Bellota hirsuta</i>                               | Sierra Alhamilla, Almeria, Spain               | MG065776          |
| <i>Neoplatysporoides aloicola</i>     | CBS 139901       | <i>Aloe</i> sp.                                      | Tanzania                                       | KR476719 KR476754 |
| <b><i>Alternaria alternata</i></b>    | <b>CF-090395</b> | <b><i>Arthrocnemum macrostachyum</i></b>             | <b>Cabo de gata salt marsh, Almeria, Spain</b> | <b>MG065777</b>   |
| <b><i>Alternaria alternata</i></b>    | <b>CF-090318</b> | <b><i>Artemisia barrelieri</i></b>                   | <b>Tabernas desert, Almeria, Spain</b>         | <b>MG065778</b>   |
| <i>Alternaria alternata</i>           | CBS 115200       | <i>Citrus x tangelo</i>                              | South Africa                                   | KP124352 KP124504 |

|                                               |                  |                                          |                                         |                 |          |
|-----------------------------------------------|------------------|------------------------------------------|-----------------------------------------|-----------------|----------|
| <i>Alternaria alternata</i>                   | CBS 118814       | <i>Solanum lycopersicum</i>              | USA                                     | KP124357        | KP124509 |
| <b><i>Alternaria alternata</i></b>            | <b>CF-288903</b> | <b><i>Arthrocnemum macrostachyum</i></b> | <b>El Margen salt marsh, Granada</b>    | <b>MG065779</b> |          |
| <b><i>Alternaria alternata</i></b>            | <b>CF-090322</b> | <b><i>Artemisia barrelieri</i></b>       | <b>Tabernas desert, Almeria, Spain</b>  | <b>MG065780</b> |          |
| <i>Alternaria alternata</i>                   | CBS 102600       | <i>Citrus reticulata</i>                 | USA                                     | KP124331        | KP124483 |
| <b><i>Alternaria alternata</i></b>            | <b>CF-288939</b> | <b><i>Suaeda vera</i></b>                | <b>El Margen salt marsh, Granada</b>    | <b>MG065781</b> |          |
| <b><i>Alternaria</i> sp.</b>                  | <b>CF-090254</b> | <b><i>Asparagus horridus</i></b>         | <b>Tabernas desert, Almeria, Spain</b>  | <b>MG065782</b> |          |
| <i>Alternaria gaisen</i>                      | CBS 118488       | <i>Pyrus pyrifolia</i>                   | Japan                                   | KP124427        | KP124581 |
| <i>Alternaria arborescens</i>                 | CBS 102605       | <i>Lycopersicon esculentum</i>           | California                              | NR_135927       | KC584253 |
| <i>Alternaria eichhorniae</i>                 | CBS 119778       | <i>Eichhornia crassipes</i>              | Indonesia                               | KP124426        | KP124580 |
| <b><i>Alternaria</i> sp.</b>                  | <b>CF-090752</b> | <b><i>Thymelaea hirsuta</i></b>          | <b>Los Almorades, Almeria, Spain</b>    | <b>MG065783</b> |          |
| <b><i>Alternaria</i> sp.</b>                  | <b>CF-090365</b> | <b><i>Sedum sediforme</i></b>            | <b>Sierra Alhamilla, Almeria, Spain</b> | <b>MG065784</b> |          |
| <i>Alternaria terricola</i>                   | CBS 202.67       | wheat field soil                         | Northern Utah                           | NR_103600       | KC584365 |
| <b><i>Alternaria</i></b>                      | <b>CF-288921</b> | <b><i>Ononis tridentata</i></b>          | <b>El Margen salt marsh, Granada</b>    | <b>MG065785</b> |          |
| <i>Alternaria nobilis</i>                     | CBS 116490       | <i>Dianthus caryophyllus</i>             | New Zealand                             | KC584208        | KC584291 |
| <i>Alternaria infectoria</i>                  | CBS 210.86       | <i>Triticum aestivum</i>                 | England                                 | NR_131263       | KC584280 |
| <i>Alternaria ethzedia</i>                    | CBS 197.86       | <i>Brassica napus</i>                    | Switzerland                             | NR_135928       | KC584274 |
| <b><i>Alternaria</i> sp.</b>                  | <b>CF-288904</b> | <b><i>Arthrocnemum macrostachyum</i></b> | <b>El Margen salt marsh, Granada</b>    | <b>MG065786</b> |          |
| <b><i>Alternaria</i> sp.</b>                  | <b>CF-282008</b> | <b><i>Retama sphaerocarpa</i></b>        | <b>Albuñuelas, Granada, Spain</b>       | <b>MG065787</b> |          |
| <b><i>Alternaria</i> sp.</b>                  | <b>CF-288922</b> | <b><i>Ononis tridentata</i></b>          | <b>El Margen salt marsh, Granada</b>    | <b>MG065788</b> |          |
| <b><i>Alternaria</i> sp.</b>                  | <b>CF-288961</b> | <b><i>Sonchus crassifolius</i></b>       | <b>El Margen salt marsh, Granada</b>    | <b>MG065789</b> |          |
| <b><i>Alternaria</i> sp.</b>                  | <b>CF-090246</b> | <b><i>Genista umbellata</i></b>          | <b>Tabernas desert, Almeria, Spain</b>  | <b>MG065790</b> |          |
| <b><i>Alternaria</i> sp.</b>                  | <b>CF-090261</b> | <b><i>Asparagus horridus</i></b>         | <b>Tabernas desert, Almeria, Spain</b>  | <b>MG065791</b> |          |
| <b><i>Alternaria</i> sp.</b>                  | <b>CF-288960</b> | <b><i>Frankenia pulvirulenta</i></b>     | <b>El Margen salt marsh, Granada</b>    | <b>MG065792</b> |          |
| <i>Alternaria penicillata</i>                 | CBS 116607       | <i>Papaver rhoeas</i>                    | Austria                                 | KC584229        | KC584322 |
| <i>Dendryphion papaveris</i>                  | NBRC 9282        | <i>Papaver somniferum</i>                | -                                       | NBRC9282        |          |
| <i>Dendryphion papaveris</i>                  | NBRC 9801        | <i>Papaver somniferum</i>                | Nagano, Japan                           | NBRC9801        |          |
| <i>Alternaria solani</i>                      | CBS 116651       | <i>Solanum tuberosum</i>                 | USA                                     | KC584217        | KC584306 |
| <b><i>Alternaria cumini</i></b>               | <b>CF-090366</b> | <b><i>Sedum sediforme</i></b>            | <b>Sierra Alhamilla, Almeria, Spain</b> | <b>MG065793</b> |          |
| <i>Alternaria cumini</i>                      | CBS 121329       | <i>Cuminum cyminum</i>                   | India                                   | KC584191        | KC584267 |
| <b><i>Stemphylium</i> sp.</b>                 | <b>CF-090250</b> | <b><i>Genista umbellata</i></b>          | <b>Tabernas desert, Almeria, Spain</b>  | <b>MG065794</b> |          |
| <b><i>Stemphylium</i> sp.</b>                 | <b>CF-090346</b> | <b><i>Ononis ramosissima</i></b>         | <b>Sierra Alhamilla, Almeria, Spain</b> | <b>MG065795</b> |          |
| <b><i>Stemphylium</i> sp.</b>                 | <b>CF-090776</b> | <b><i>Genista umbellata</i></b>          | <b>Tabernas desert, Almeria, Spain</b>  | <b>MG065796</b> |          |
| <b><i>Stemphylium</i> sp.</b>                 | <b>CF-090781</b> | <b><i>Asparagus horridus</i></b>         | <b>Tabernas desert, Almeria, Spain</b>  | <b>MG065797</b> |          |
| <i>Paradendryphiella salina</i>               | CBS 142.60       | <i>Spartina</i> sp.                      | Southampton, England                    | DQ411540        | KF156158 |
| <b><i>Paradendryphiella salina</i></b>        | <b>CF-285749</b> | <b><i>Centaurea dracunculifolia</i></b>  | <b>El Margen salt marsh, Granada</b>    | <b>MG065798</b> |          |
| <i>Pleospora herbarum</i> var <i>herbarum</i> | CBS 191.86       | <i>Medicago sativa</i>                   | India                                   | KC584239        | JX681120 |
| <b><i>Pleospora herbarum</i></b>              | <b>CF-090771</b> | <b><i>Genista umbellata</i></b>          | <b>Tabernas desert, Almeria, Spain</b>  | <b>MG065799</b> |          |
| <i>Pleospora herbarum</i>                     | NBRC 7404        | -                                        | -                                       | NBRC7404        |          |
| <b><i>Pleospora herbarum</i></b>              | <b>CF-285761</b> | <b><i>Inula crithmoides</i></b>          | <b>Punta Entinas, Almeria, Spain</b>    | <b>MG065800</b> |          |

|                                       |                |                                   |                                         |                   |
|---------------------------------------|----------------|-----------------------------------|-----------------------------------------|-------------------|
| <i>Pleospora herbarum</i>             | CF-288936      | <i>Sonchus crassifolius</i>       | El Margen salt marsh, Granada           | MG065801          |
| <i>Pleospora herbarum</i>             | CF-090249      | <i>Genista umbellata</i>          | Tabernas desert, Almeria, Spain         | MG065802          |
| <i>Comoclathris sedi</i>              | MFLUCC 13-0763 | <i>Rosa</i> sp.                   | Italy                                   | KP334717 KP334707 |
| <i>Comoclathris</i> sp.               | CF-090266      | <i>Lygeum spartum</i>             | Tabernas desert, Almeria, Spain         | MG065803          |
| <i>Comoclathris</i> sp.               | CF-287447      | <i>Rosmarinus eriocalyx</i>       | Tabernas desert, Almeria, Spain         | MG065804          |
| <i>Comoclathris</i> sp.               | CF-090792      | <i>Lygeum spartum</i>             | Tabernas desert, Almeria, Spain         | MG065805          |
| <i>Comoclathris</i> sp.               | CF-091934      | <i>Lygeum spartum</i>             | Tabernas desert, Almeria, Spain         | MG065806          |
| <i>Comoclathris</i> sp.               | CF-091944      | <i>Launaea arboresceus</i>        | Tabernas desert, Almeria, Spain         | MG065807          |
| <i>Comoclathris</i> sp.               | CF-285379      | <i>Fagonia cretica</i>            | Tabernas desert, Almeria, Spain         | MG065808          |
| <i>Comoclathris</i> sp.               | CF-282003      | <i>Retama sphaerocarpa</i>        | Albuñuelas, Granada, Spain              | MG065809          |
| <i>Comoclathris</i> sp.               | CF-090361      | <i>Sedum sediforme</i>            | Sierra Alhamilla, Almeria, Spain        | MG065810          |
| <i>Comoclathris</i> sp.               | CF-090763      | <i>Nerium oleander</i>            | Tabernas desert, Almeria, Spain         | MG065811          |
| <i>Comoclathris spartii</i>           | MFLUCC 13-0214 | <i>Spartium junceum</i>           | Italy                                   | KM577159 KM577160 |
| <i>Comoclathris</i> sp.               | CF-091922      | <i>Ziziphus lotus</i>             | Los Almorades, Almeria, Spain           | MG065812          |
| <i>Comoclathris</i> sp.               | CF-090267      | <i>Lygeum spartum</i>             | Tabernas desert, Almeria, Spain         | MG065813          |
| <i>Tamaricicola</i> sp.               | CF-288959      | <i>Limonium majus</i>             | El Margen salt marsh, Granada           | MG065814          |
| <i>Tamaricicola</i> sp.               | CF-288916      | <i>Limonium majus</i>             | El Margen salt marsh, Granada           | MG065815          |
| <i>Tamaricicola</i> sp.               | CF-090279      | <i>Limonium insigne</i>           | Tabernas desert, Almeria, Spain         | MG065816          |
| <i>Tamaricicola muriformis</i>        | MFLUCC 15-0488 | <i>Tamarix gallica</i>            | Italy                                   | KU752187 KU561879 |
| <i>Tamaricicola muriformis</i>        | MFLUCC 15-0490 | <i>Tamarix gallica</i>            | Italy                                   | KU752189 KU729856 |
| <i>Decorospora gaudefroyi</i>         | NBRC 32144     | <i>Salicornia herbacea</i>        | Lake Notoro, Hokkaido, Japan            | NBRC32144         |
| <i>Decorospora</i> sp.                | ATCC MYA-3203  | <i>Sarcocornia perennis</i>       | Red Bank, Northampton Co., VA, USA.     | FJ914870 FJ914897 |
| <i>Phoma</i> sp.                      | CF-288917      | <i>Lygeum spartum</i>             | El Margen salt marsh, Granada           | MG065817          |
| <i>Phoma</i> sp.                      | CF-090826      | <i>Thymus hyemalis</i>            | Tabernas desert, Almeria, Spain         | MG065818          |
| <i>Phoma</i> sp.                      | CF-090829      | <i>Thymus hyemalis</i>            | Tabernas desert, Almeria, Spain         | MG065819          |
| <i>Phoma</i> sp.                      | CF-090291      | <i>Thymus hyemalis</i>            | Tabernas desert, Almeria, Spain         | MG065820          |
| <i>Neocamarosporium</i> sp.           | CF-090392      | <i>Arthrocnemum macrostachyum</i> | Cabo de gata salt marsh, Almeria, Spain | MG065821          |
| <i>Neocamarosporium</i> sp.           | CF-288932      | <i>Salsola vermiculata</i>        | El Margen salt marsh, Granada           | MG065822          |
| <i>Neocamarosporium</i> sp.           | CF-288928      | <i>Salsola vermiculata</i>        | El Margen salt marsh, Granada           | MG065823          |
| <i>Neocamarosporium</i> sp.           | CF-288962      | <i>Arthrocnemum macrostachyum</i> | El Margen salt marsh, Granada           | MG065824          |
| <i>Neocamarosporium</i> sp.           | CF-090841      | <i>Salsola genistoides</i>        | Tabernas desert, Almeria, Spain         | MG065825          |
| <i>Neocamarosporium</i> sp.           | CF-285744      | <i>Atriplex glauca</i>            | El Margen salt marsh, Granada           | MG065826          |
| <i>Neocamarosporium</i> sp.           | CF-285775      | <i>Suaeda vera</i>                | El Margen salt marsh, Granada           | MG065827          |
| <i>Neocamarosporium</i> sp.           | CF-285377      | <i>Suaeda vera</i>                | Tabernas desert, Almeria, Spain         | MG065828          |
| <i>Neocamarosporium</i> sp.           | CF-288934      | <i>Salsola vermiculata</i>        | El Margen salt marsh, Granada           | MG065829          |
| <i>Neocamarosporium</i> sp.           | CF-090309      | <i>Suaeda vera</i>                | Tabernas desert, Almeria, Spain         | MG065830          |
| <i>Neocamarosporium chichastianum</i> | CF-285348      | <i>Salsola papillosa</i>          | Tabernas desert, Almeria, Spain         | MG065831          |
| <i>Neocamarosporium chichastianum</i> | CBS 137502     | saline soil                       | Iran                                    | KP004455 KP004483 |
| <i>Neocamarosporium chersinae</i>     | CPC 27298      | Dead angulate tortoise shell      | South Africa                            | KY929153 KY929182 |

|                                     |                  |                                                |                                         |                   |
|-------------------------------------|------------------|------------------------------------------------|-----------------------------------------|-------------------|
| <i>Neocamarosporium</i> sp.         | <b>CF-090312</b> | <i>Suaeda vera</i>                             | Tabernas desert, Almeria, Spain         | <b>MG065832</b>   |
| <i>Neocamarosporium</i> sp.         | <b>CF-285373</b> | <i>Salsola papillosa</i>                       | Tabernas desert, Almeria, Spain         | <b>MG065833</b>   |
| <i>Neocamarosporium</i> sp.         | <b>CF-285768</b> | <i>Lycium intricatum</i>                       | Torre Garcia, Almeria, Spain            | <b>MG065834</b>   |
| <i>Neocamarosporium</i> sp.         | <b>CF-090390</b> | <i>Arthrocnemum macrostachyum</i>              | Cabo de gata salt marsh, Almeria, Spain | <b>MG065835</b>   |
| <i>Neocamarosporium</i> sp.         | <b>CF-287455</b> | <i>Lycium intricatum</i>                       | Torre Garcia, Almeria, Spain            | <b>MG065836</b>   |
| <i>Dimorphosporicola</i> sp.        | <b>CF-090768</b> | <i>Suaeda vera</i>                             | Tabernas desert, Almeria, Spain         | <b>MG065837</b>   |
| <i>Dimorphosporicola tragani</i>    | CBS 570.85       | <i>Traganum nudatum</i> var. <i>microphyll</i> | Mauritania                              | KU728497 KU728536 |
| <i>Dimorphosporicola tragani</i>    | <b>CF-090383</b> | <i>Arthrocnemum macrostachyum</i>              | Cabo de gata salt marsh, Almeria, Spain | <b>MG065838</b>   |
| <i>Chaetosphaeronema hispidulum</i> | CBS 826.88       | soil                                           | Israel                                  | EU754145          |
| <i>Neocamarosporium</i> sp.         | <b>CF-090393</b> | <i>Arthrocnemum macrostachyum</i>              | Cabo de gata salt marsh, Almeria, Spain | <b>MG065839</b>   |
| <i>Neocamarosporium</i> sp.         | <b>CF-288930</b> | <i>Salsola vermiculata</i>                     | El Margen salt marsh, Granada           | <b>MG065840</b>   |
| <i>Neocamarosporium</i> sp.         | <b>CF-285746</b> | <i>Atriplex glauca</i>                         | El Margen salt marsh, Granada           | <b>MG065841</b>   |
| <i>Neocamarosporium</i> sp.         | <b>CF-285745</b> | <i>Atriplex glauca</i>                         | El Margen salt marsh, Granada           | <b>MG065842</b>   |
| <i>Neocamarosporium</i> sp.         | <b>CF-285747</b> | <i>Beta macrocarpa</i>                         | El Margen salt marsh, Granada           | <b>MG065843</b>   |
| <i>Chaetodiplodia</i> sp.           | CBS 453.68       | <i>Halimione portulacoides</i>                 | Netherlands                             | DQ678054          |
| <i>Neocamarosporium</i> sp.         | <b>CF-285349</b> | <i>Anabasis articulata</i>                     | Tabernas desert, Almeria, Spain         | <b>MG065844</b>   |
| <i>Neocamarosporium</i> sp.         | <b>CF-285372</b> | <i>Anabasis articulata</i>                     | Tabernas desert, Almeria, Spain         | <b>MG065845</b>   |
| <i>Neocamarosporium</i> sp.         | <b>CF-090335</b> | <i>Anthyllis cihoides</i>                      | Sierra Alhamilla, Almeria, Spain        | <b>MG065846</b>   |
| <i>Neocamarosporium</i> sp.         | <b>CF-285368</b> | <i>Anabasis articulata</i>                     | Tabernas desert, Almeria, Spain         | <b>MG065847</b>   |
| <i>Neocamarosporium</i> sp.         | <b>CF-090759</b> | <i>Nerium oleander</i>                         | Tabernas desert, Almeria, Spain         | <b>MG065848</b>   |
| <i>Neocamarosporium goegapense</i>  | CBS 138008       | <i>Mesembryanthemum</i> sp.                    | Northern Cape Province, South Africa    | KJ869163 KJ869220 |
| <i>Neocamarosporium goegapense</i>  | <b>CF-090399</b> | <i>Chamaerops humilis</i>                      | Cabo de gata salt marsh, Almeria, Spain | <b>MG065849</b>   |
| <i>Neocamarosporium</i> sp.         | <b>CF-285352</b> | <i>Atriplex glauca</i>                         | El Margen salt marsh, Granada           | <b>MG065850</b>   |
| <i>Neocamarosporium</i> sp.         | <b>CF-090227</b> | <i>Suaeda vera</i>                             | Tabernas desert, Almeria, Spain         | <b>MG065851</b>   |
| <i>Neocamarosporium</i> sp.         | <b>CF-090284</b> | <i>Salicornia</i> sp.                          | Tabernas desert, Almeria, Spain         | <b>MG065852</b>   |
| <i>Neocamarosporium</i> sp.         | <b>CF-090843</b> | <i>Salsola genistoides</i>                     | Tabernas desert, Almeria, Spain         | <b>MG065853</b>   |
| <i>Neocamarosporium</i> sp.         | <b>CF-090773</b> | <i>Genista umbellata</i>                       | Tabernas desert, Almeria, Spain         | <b>MG065854</b>   |
| <i>Phaeosphaeriaceae</i> sp.        | DF-R-7           | <i>Kochia scoparia</i>                         | QingDao, China                          | KU991885 KU991909 |
| <i>Neocamarosporium betae</i>       | CBS 523.66       | <i>Beta vulgaris</i>                           | Netherlands                             | FJ426981 EU754179 |
| <i>Neocamarosporium betae</i>       | CBS 109410       | <i>Beta vulgaris</i>                           | unknown                                 | KY940790 EU754178 |
| <i>Neocamarosporium calvescens</i>  | CBS 344.78       | <i>Atriplex hastata</i>                        | Netherlands                             | EU754132          |
| <i>Neocamarosporium</i> sp.         | <b>CF-090842</b> | <i>Salsola genistoides</i>                     | Tabernas desert, Almeria, Spain         | <b>MG065855</b>   |
| <i>Neocamarosporium calvescens</i>  | CBS 432.77       | <i>Obione portulacoides</i>                    | Netherlands                             | GU230752 JF740267 |

<sup>a</sup> ATCC, American Type Culture Collection, University Boulevard Manassas VA, USA; CBS, CBS-KNAW Fungal Biodiversity Centre, Utrecht, the Netherlands; CF, Fundación MEDINA Private Fungal Collection, Granada, Spain; CPC, Culture collection of Pedro Crous, housed at CBS, Netherlands; MFLUCC, Mae Fah Luang University Culture Collection, Chiang Rai, Thailand; NBRC, Biological Resource Center, National Institute of Technology and Evolution, Tokyo, Japan

<sup>b</sup> Accession numbers of sequences newly generated in this study are indicated in bold. 28S, large subunit of the nrDNA; ITS, internal transcribed spacer regions of the nrDNA and intervening 5.8S nrDNA

**Supplementary Table 3.** Categorization of active isolates according to target strain. Chemical dereplication of fungal metabolites (otherwise specified). A (*Aspergillus fumigatus*), C (*Candida albicans*), M (*Magnaporthe grisea*), Ca (*Colletotrichum acutatum*) and H (HepG2).

| Strain    | Taxonomy                          | Exclusive Resin |   |   |    |   | Both |   |   |    |   | Exclusive No Resin |   |   |    |   | LC-MS Dereplication                                                                                                                                                              |
|-----------|-----------------------------------|-----------------|---|---|----|---|------|---|---|----|---|--------------------|---|---|----|---|----------------------------------------------------------------------------------------------------------------------------------------------------------------------------------|
|           |                                   | A               | C | M | Ca | H | A    | C | M | Ca | H | A                  | C | M | Ca | H |                                                                                                                                                                                  |
| CF-285778 | <i>Albifimbria verrucaria</i>     | 0               | 0 | 0 | 0  | 0 | 1    | 1 | 1 | 1  | 1 | 0                  | 0 | 0 | 0  | 0 | illudin C2, roridin A & H, verrucarins A&B                                                                                                                                       |
| CF-277739 | <i>Trichothecium roseum</i>       | 0               | 0 | 0 | 0  | 0 | 1    | 1 | 1 | 1  | 1 | 0                  | 0 | 0 | 0  | 0 | trichothecene                                                                                                                                                                    |
| CF-285757 | <i>Trichothecium roseum</i>       | 0               | 0 | 0 | 0  | 0 | 1    | 1 | 1 | 1  | 1 | 0                  | 0 | 0 | 0  | 0 | trichothecene                                                                                                                                                                    |
| CF-285465 | <i>Coprinus cinereus</i>          | 0               | 0 | 1 | 0  | 0 | 1    | 1 | 0 | 1  | 1 | 0                  | 0 | 0 | 0  | 0 | skyrin, lagopodin B                                                                                                                                                              |
| CF-091944 | <i>Comoclathris</i> sp.           | 0               | 0 | 0 | 0  | 0 | 0    | 0 | 1 | 0  | 0 | 1                  | 1 | 0 | 1  | 1 | phomasetin, altersetin                                                                                                                                                           |
| CF-285780 | <i>Neosetophoma</i> sp.           | 0               | 0 | 0 | 0  | 0 | 1    | 0 | 1 | 0  | 1 | 0                  | 0 | 0 | 1  | 0 | globosuxanthone A                                                                                                                                                                |
| CF-285756 | <i>Pseudodiplodia</i> sp.         | 1               | 0 | 0 | 0  | 0 | 0    | 0 | 1 | 0  | 1 | 0                  | 0 | 0 | 1  | 0 | globosuxanthone A, emodin                                                                                                                                                        |
| CF-282003 | <i>Comoclathris</i> sp.           | 1               | 0 | 0 | 0  | 0 | 0    | 0 | 1 | 0  | 0 | 0                  | 0 | 0 | 1  | 1 | phomasetin, altersetin                                                                                                                                                           |
| CF-287447 | <i>Comoclathris</i> sp.           | 1               | 0 | 0 | 0  | 0 | 0    | 0 | 0 | 0  | 0 | 0                  | 0 | 1 | 1  | 1 | phomasetin, altersetin                                                                                                                                                           |
| CF-285362 | <i>Dendryphon</i> sp.             | 0               | 0 | 0 | 0  | 0 | 0    | 0 | 1 | 0  | 0 | 0                  | 0 | 0 | 1  | 1 | phomasetin                                                                                                                                                                       |
| CF-287464 | <i>Pyrenochaeta</i> sp.           | 0               | 0 | 0 | 0  | 0 | 0    | 0 | 0 | 0  | 0 | 0                  | 0 | 1 | 1  | 1 | C <sub>29</sub> H <sub>41</sub> NO <sub>5</sub> (previously described in plants)                                                                                                 |
| CF-090752 | <i>Alternaria</i> sp.             | 0               | 0 | 1 | 0  | 0 | 1    | 0 | 0 | 0  | 1 | 0                  | 0 | 0 | 0  | 0 | dextrusin B, B4, terpestacin                                                                                                                                                     |
| CF-279239 | <i>Coniochaeta</i> sp.            | 0               | 0 | 0 | 0  | 0 | 1    | 0 | 0 | 0  | 1 | 0                  | 0 | 1 | 0  | 0 | Curvicolide A/B, xylactam, C <sub>26</sub> H <sub>42</sub> O <sub>5</sub> (previously described in plants)                                                                       |
| CF-091924 | unidentified                      | 0               | 0 | 0 | 0  | 0 | 1    | 0 | 1 | 0  | 0 | 0                  | 0 | 0 | 0  | 1 | possible antibiotic YW 3548, C <sub>47</sub> H <sub>75</sub> N <sub>7</sub> O <sub>12</sub> and C <sub>46</sub> H <sub>73</sub> N <sub>7</sub> O <sub>12</sub> (no match in DNP) |
| CF-091922 | <i>Comoclathris</i> sp.           | 0               | 0 | 1 | 0  | 0 | 0    | 0 | 0 | 0  | 1 | 0                  | 0 | 0 | 0  | 0 | illudin C3, C <sub>26</sub> H <sub>43</sub> NO <sub>6</sub> (previously described in plants)                                                                                     |
| CF-091951 | <i>Xylaria</i> sp.                | 0               | 0 | 1 | 0  | 0 | 0    | 0 | 0 | 0  | 1 | 0                  | 0 | 0 | 0  | 0 | nectriapyrone, cytochalasin C/D/M/Q                                                                                                                                              |
| CF-279244 | <i>Coprinopsis episcopalis</i>    | 0               | 0 | 1 | 0  | 0 | 0    | 0 | 0 | 0  | 1 | 0                  | 0 | 0 | 0  | 0 | lagopodin A & B                                                                                                                                                                  |
| CF-282344 | unidentified                      | 0               | 0 | 0 | 0  | 1 | 0    | 0 | 1 | 0  | 0 | 0                  | 0 | 0 | 0  | 0 | phomasetin                                                                                                                                                                       |
| CF-091933 | <i>Pleospora</i> sp.              | 0               | 0 | 0 | 0  | 0 | 0    | 0 | 0 | 0  | 0 | 0                  | 0 | 1 | 0  | 1 | phomasetin, altersetin                                                                                                                                                           |
| CF-090383 | <i>Dimorphosporicola traganii</i> | 1               | 1 | 0 | 0  | 1 | 0    | 0 | 0 | 0  | 0 | 0                  | 0 | 0 | 0  | 0 | cerulenin                                                                                                                                                                        |
| CF-090835 | <i>Preussia</i> sp.               | 0               | 0 | 0 | 0  | 1 | 0    | 1 | 0 | 0  | 0 | 0                  | 0 | 0 | 0  | 0 | di-hydro-bi-chloro-geodin, TMC 120 B & C                                                                                                                                         |
| CF-090227 | <i>Neocamarosporium</i> sp.       | 0               | 0 | 0 | 0  | 0 | 1    | 0 | 0 | 0  | 1 | 0                  | 0 | 0 | 0  | 0 | leptosphaeridione                                                                                                                                                                |
| CF-090766 | <i>Comoclathris</i> sp.           | 1               | 0 | 0 | 0  | 0 | 0    | 0 | 0 | 0  | 1 | 0                  | 0 | 0 | 0  | 0 | possible coriolide                                                                                                                                                               |
| CF-288925 | unidentified                      | 1               | 0 | 0 | 0  | 0 | 0    | 0 | 0 | 0  | 1 | 0                  | 0 | 0 | 0  | 0 | hormonemate, possible coriolide                                                                                                                                                  |
| CF-090379 | <i>Camarosporium</i> sp.          | 0               | 0 | 0 | 0  | 0 | 1    | 0 | 0 | 0  | 0 | 0                  | 0 | 0 | 0  | 1 | naematolin, naematolone, roridin L2                                                                                                                                              |
| CF-286681 | <i>Neodidymelliopsis</i> sp.      | 0               | 0 | 0 | 0  | 0 | 1    | 0 | 0 | 0  | 0 | 0                  | 0 | 0 | 0  | 1 | waol A                                                                                                                                                                           |
| CF-285753 | <i>Pseudodiplodia rutilcola</i>   | 0               | 0 | 0 | 0  | 0 | 1    | 0 | 0 | 0  | 0 | 0                  | 0 | 0 | 0  | 1 | violaceol, C <sub>22</sub> H <sub>24</sub> O <sub>11</sub> S (no match in DNP)                                                                                                   |
| CF-285754 | <i>Pseudodiplodia rutilcola</i>   | 0               | 0 | 0 | 0  | 0 | 1    | 0 | 0 | 0  | 0 | 0                  | 0 | 0 | 0  | 1 | possible 2-(3,4-Epoxy-5-heptenyl)-5-methylpyrrole, C <sub>23</sub> H <sub>24</sub> O <sub>11</sub> S (no match in DNP)                                                           |
| CF-090353 | <i>Lepteutypa cupressi</i>        | 0               | 0 | 0 | 0  | 1 | 0    | 0 | 0 | 0  | 0 | 1                  | 0 | 0 | 0  | 0 | MDN-210 (C <sub>17</sub> H <sub>24</sub> O <sub>4</sub> ), pestahivin                                                                                                            |
| CF-090758 | unidentified                      | 1               | 0 | 0 | 0  | 0 | 0    | 0 | 0 | 0  | 0 | 0                  | 0 | 0 | 0  | 1 | possible coriolide                                                                                                                                                               |
| CF-090357 | <i>Leptosphaeria hispanica</i>    | 0               | 0 | 0 | 0  | 0 | 0    | 0 | 0 | 0  | 0 | 1                  | 0 | 0 | 0  | 1 | massarigenin A, cordyol C, dehydromassarilactone D, phomasetin                                                                                                                   |
| CF-090361 | <i>Comoclathris</i> sp.           | 0               | 0 | 0 | 0  | 0 | 0    | 0 | 0 | 0  | 0 | 1                  | 0 | 0 | 0  | 1 | 2-(2-Hydroxy-5-metgospheoxy) acrylic acid, C <sub>18</sub> H <sub>30</sub> O <sub>4</sub> S (no match in DNP), possible coriolide                                                |
| CF-287440 | <i>Aureobasidium</i> sp.          | 0               | 0 | 0 | 0  | 0 | 0    | 0 | 0 | 0  | 0 | 1                  | 0 | 0 | 0  | 1 | C <sub>48</sub> H <sub>78</sub> O <sub>18</sub> (previously described from plants)                                                                                               |
| CF-090213 | <i>Eutypa consobrina</i>          | 1               | 0 | 0 | 0  | 1 | 0    | 0 | 0 | 0  | 0 | 0                  | 0 | 0 | 0  | 0 | MDN-209 (C <sub>17</sub> H <sub>26</sub> O <sub>4</sub> ), MDN-210 (C <sub>17</sub> H <sub>24</sub> O <sub>4</sub> ), MDN-211 (C <sub>16</sub> H <sub>12</sub> O <sub>4</sub> )  |

|           |                                |   |   |   |   |   |   |   |   |   |   |   |   |   |   |   |                                                                                                           |
|-----------|--------------------------------|---|---|---|---|---|---|---|---|---|---|---|---|---|---|---|-----------------------------------------------------------------------------------------------------------|
| CF-090748 | <i>unidentified</i>            | 1 | 0 | 0 | 0 | 0 | 0 | 0 | 0 | 0 | 0 | 0 | 0 | 0 | 0 | 1 | possible cerebroside B                                                                                    |
| CF-281556 | <i>Stagnospora</i> sp.         | 0 | 0 | 0 | 1 | 0 | 1 | 1 | 1 | 0 | 0 | 0 | 0 | 0 | 0 | 0 | secalonic acid C, possible alternethanoxin A                                                              |
| CF-090324 | <i>Pseudocamarosporium</i> sp. | 0 | 1 | 1 | 1 | 0 | 0 | 0 | 0 | 0 | 0 | 1 | 0 | 0 | 0 | 0 | calbistrin A                                                                                              |
| CF-285462 | <i>Fusarium equiseti</i>       | 0 | 0 | 0 | 0 | 0 | 0 | 1 | 0 | 0 | 0 | 0 | 0 | 1 | 1 | 0 | equisetin                                                                                                 |
| CF-090393 | <i>Neocamarosporium</i> sp.    | 1 | 0 | 0 | 1 | 0 | 0 | 0 | 0 | 0 | 0 | 0 | 0 | 0 | 0 | 0 | possible solanopyrone B                                                                                   |
| CF-285355 | <i>Ascochyta</i> sp.           | 0 | 0 | 0 | 0 | 0 | 0 | 0 | 0 | 0 | 0 | 1 | 0 | 1 | 0 | 0 | cephalochromin and cercosporamide                                                                         |
| CF-285768 | <i>Neocamarosporium</i> sp.    | 0 | 0 | 1 | 0 | 0 | 0 | 0 | 0 | 0 | 0 | 1 | 0 | 0 | 0 | 0 | terrecyclic acid A                                                                                        |
| CF-090792 | <i>Comoclathris</i> sp.        | 0 | 0 | 0 | 0 | 0 | 0 | 0 | 0 | 0 | 0 | 1 | 0 | 1 | 0 | 0 | phomasetin, altersetin                                                                                    |
| CF-288952 | <i>Phaeosphaeria</i> sp.       | 0 | 0 | 0 | 0 | 0 | 0 | 0 | 0 | 0 | 0 | 0 | 0 | 1 | 1 | 0 | possible brefeldin A and mycophenolic acid                                                                |
| CF-287454 | <i>Ascochyta</i> sp.           | 0 | 0 | 0 | 0 | 0 | 0 | 1 | 0 | 0 | 0 | 1 | 0 | 0 | 0 | 0 | cercosporamide                                                                                            |
| CF-090351 | <i>Hormonema carpetanum</i>    | 0 | 0 | 0 | 0 | 0 | 1 | 0 | 0 | 0 | 0 | 0 | 1 | 0 | 0 | 0 | C <sub>30</sub> H <sub>54</sub> O <sub>14</sub> (no match in DNP)                                         |
| CF-285358 | <i>Phaeotheca triangularis</i> | 0 | 0 | 0 | 0 | 0 | 1 | 0 | 0 | 0 | 0 | 0 | 1 | 0 | 0 | 0 | possible coriolid C <sub>18</sub> H <sub>30</sub> O <sub>2</sub>                                          |
| CF-285461 | <i>Xylaria</i> sp.             | 1 | 1 | 0 | 0 | 0 | 0 | 0 | 0 | 0 | 0 | 0 | 0 | 0 | 0 | 0 | antibiotic TKR2648                                                                                        |
| CF-285752 | <i>Cryptococcus</i> sp.        | 0 | 1 | 0 | 0 | 0 | 0 | 0 | 0 | 0 | 0 | 1 | 0 | 0 | 0 | 0 | C <sub>15</sub> H <sub>20</sub> O <sub>3</sub>                                                            |
| CF-090267 | <i>Comoclathris</i> sp.        | 0 | 0 | 0 | 0 | 0 | 0 | 0 | 0 | 0 | 0 | 1 | 1 | 0 | 0 | 0 | possible coriolid and nematolin                                                                           |
| CF-287457 | <i>Setomelanomma</i> sp.       | 0 | 0 | 0 | 0 | 0 | 0 | 0 | 0 | 0 | 0 | 1 | 1 | 0 | 0 | 0 | 11,12-dihydroxyeudesm-4-en-3-one, possible coriolid                                                       |
| CF-288933 | <i>Preussia australis</i>      | 1 | 1 | 0 | 0 | 0 | 0 | 0 | 0 | 0 | 0 | 0 | 0 | 0 | 0 | 0 | C <sub>18</sub> H <sub>33</sub> NO (previously described in plants)                                       |
| CF-277101 | <i>Selenophoma juncea</i>      | 0 | 0 | 0 | 0 | 0 | 0 | 0 | 0 | 0 | 1 | 0 | 0 | 0 | 0 | 0 | heptelidic acid (avocettin)                                                                               |
| CF-090350 | <i>Anthostomella</i> sp.       | 0 | 0 | 0 | 0 | 0 | 0 | 0 | 0 | 0 | 1 | 0 | 0 | 0 | 0 | 0 | heptelidic and hydroheptelidic acid                                                                       |
| CF-090359 | <i>Stagnospora</i> sp.         | 0 | 0 | 0 | 0 | 0 | 0 | 0 | 0 | 0 | 1 | 0 | 0 | 0 | 0 | 0 | 11,12-dihydroxyeudesm-4-en-3-one, diorcinol F, altersetin, phomasetin                                     |
| CF-090782 | <i>Foliophoma</i> sp.          | 0 | 0 | 0 | 0 | 0 | 0 | 0 | 0 | 0 | 1 | 0 | 0 | 0 | 0 | 0 | C <sub>39</sub> H <sub>27</sub> NO <sub>8</sub> S (no match in DNP)                                       |
| CF-090785 | <i>Neomicrosphaeropsis</i> sp. | 0 | 0 | 0 | 0 | 0 | 0 | 0 | 0 | 0 | 1 | 0 | 0 | 0 | 0 | 0 | possible ACTG Toxin C                                                                                     |
| CF-090828 | <i>Lophiostoma</i> sp.         | 0 | 0 | 0 | 0 | 0 | 0 | 0 | 0 | 0 | 1 | 0 | 0 | 0 | 0 | 0 | oxasetin, cytochalasin, C <sub>22</sub> H <sub>22</sub> O <sub>8</sub> (previously described in plants)   |
| CF-092173 | <i>Xenodidymella</i> sp.       | 0 | 0 | 0 | 0 | 0 | 0 | 0 | 0 | 0 | 1 | 0 | 0 | 0 | 0 | 0 | possible coriolid, phomasetin                                                                             |
| CF-092175 | <i>Libertasomyces</i> sp.      | 0 | 0 | 0 | 0 | 0 | 0 | 0 | 0 | 0 | 1 | 0 | 0 | 0 | 0 | 0 | possible naematolin                                                                                       |
| CF-092179 | <i>unidentified</i>            | 0 | 0 | 0 | 0 | 0 | 0 | 0 | 0 | 0 | 1 | 0 | 0 | 0 | 0 | 0 | C <sub>29</sub> H <sub>33</sub> N <sub>3</sub> O <sub>6</sub> (previously described in plants)            |
| CF-278520 | <i>Phoma</i> sp.               | 0 | 0 | 0 | 0 | 0 | 0 | 0 | 0 | 0 | 1 | 0 | 0 | 0 | 0 | 0 | curvicolide A/B, C <sub>26</sub> H <sub>42</sub> O <sub>5</sub> (previously described in plants)          |
| CF-279248 | <i>Anthostomella</i> sp.       | 0 | 0 | 0 | 0 | 0 | 0 | 0 | 0 | 0 | 1 | 0 | 0 | 0 | 0 | 0 | C <sub>26</sub> H <sub>42</sub> O <sub>5</sub> (previously described in plants)                           |
| CF-285767 | <i>Neomicrosphaeropsis</i> sp. | 0 | 0 | 0 | 0 | 0 | 0 | 0 | 0 | 0 | 1 | 0 | 0 | 0 | 0 | 0 | phomasetin                                                                                                |
| CF-286679 | <i>Chaetomium</i> sp.          | 0 | 0 | 0 | 0 | 0 | 0 | 0 | 0 | 0 | 1 | 0 | 0 | 0 | 0 | 0 | possible sphaeropsidin B, C <sub>26</sub> H <sub>42</sub> O <sub>5</sub> (previously described in plants) |
| CF-090249 | <i>Pleospora herbarum</i>      | 0 | 0 | 0 | 0 | 1 | 0 | 0 | 0 | 0 | 0 | 0 | 0 | 0 | 0 | 0 | possible coriolid                                                                                         |
| CF-090313 | <i>Morinia</i> sp.             | 0 | 0 | 0 | 0 | 1 | 0 | 0 | 0 | 0 | 0 | 0 | 0 | 0 | 0 | 0 | MDN-209 (C <sub>17</sub> H <sub>26</sub> O <sub>4</sub> )                                                 |
| CF-090838 | <i>Preussia grandispora</i>    | 0 | 0 | 0 | 0 | 1 | 0 | 0 | 0 | 0 | 0 | 0 | 0 | 0 | 0 | 0 | mellein                                                                                                   |
| CF-285373 | <i>Neocamarosporium</i> sp.    | 0 | 0 | 0 | 0 | 1 | 0 | 0 | 0 | 0 | 0 | 0 | 0 | 0 | 0 | 0 | spirostaphylotrichin (C, D, H o G)                                                                        |
| CF-290943 | <i>unidentified</i>            | 0 | 0 | 0 | 0 | 1 | 0 | 0 | 0 | 0 | 0 | 0 | 0 | 0 | 0 | 0 | brefeldin A, C <sub>16</sub> H <sub>22</sub> O <sub>8</sub> possible macrospheptide                       |
| CF-287465 | <i>Aureobasidium pullulans</i> | 0 | 0 | 0 | 0 | 1 | 0 | 0 | 0 | 0 | 0 | 0 | 0 | 0 | 0 | 0 | possible exophilin A, C <sub>40</sub> H <sub>74</sub> O <sub>13</sub> (no match in DNP)                   |
| CF-285363 | <i>Phaeosphaeria</i> sp.       | 0 | 0 | 0 | 0 | 0 | 0 | 0 | 0 | 0 | 0 | 0 | 0 | 0 | 0 | 1 | elsinochrome D, possible phaeosphaerin C                                                                  |
| CF-090221 | <i>Verrucocladosporium</i> sp. | 0 | 0 | 0 | 0 | 0 | 0 | 0 | 0 | 0 | 0 | 0 | 0 | 0 | 0 | 1 | C <sub>19</sub> H <sub>30</sub> O <sub>9</sub> (previously described in plants), cyclo(Pro-Phe)           |
| CF-090254 | <i>Alternaria</i> sp.          | 0 | 0 | 0 | 0 | 0 | 0 | 0 | 0 | 0 | 0 | 0 | 0 | 0 | 0 | 1 | C <sub>12</sub> H <sub>19</sub> NO <sub>3</sub> (previously described in plants)                          |



|           |                                 |   |   |   |   |   |   |   |   |   |   |   |   |   |   |   |                                                                                                                                      |
|-----------|---------------------------------|---|---|---|---|---|---|---|---|---|---|---|---|---|---|---|--------------------------------------------------------------------------------------------------------------------------------------|
| CF-090330 | <i>Coniothyrium sp.</i>         | 0 | 0 | 0 | 0 | 0 | 0 | 0 | 0 | 0 | 0 | 0 | 0 | 0 | 0 | 1 | brefeldin A, C <sub>13</sub> H <sub>17</sub> NO <sub>2</sub> (previously described in plants)                                        |
| CF-090371 | <i>Morinia pestalozzioides</i>  | 0 | 0 | 0 | 0 | 0 | 0 | 0 | 0 | 0 | 0 | 0 | 0 | 0 | 0 | 1 | moriniafungin                                                                                                                        |
| CF-090372 | <i>Ascochyta sp.</i>            | 0 | 0 | 0 | 0 | 0 | 0 | 0 | 0 | 0 | 0 | 0 | 0 | 0 | 0 | 1 | C <sub>48</sub> H <sub>78</sub> O <sub>18</sub> (previously described in plants)                                                     |
| CF-090382 | <i>Libertasomyces sp.</i>       | 0 | 0 | 0 | 0 | 0 | 0 | 0 | 0 | 0 | 0 | 0 | 0 | 0 | 0 | 1 | naematolin, cytosporone D, cordyol E                                                                                                 |
| CF-090768 | <i>Dimorphosporicola sp.</i>    | 0 | 0 | 0 | 0 | 0 | 0 | 0 | 0 | 0 | 0 | 0 | 0 | 0 | 0 | 1 | cerulenin                                                                                                                            |
| CF-091931 | <i>Chaetothyriales sp.</i>      | 0 | 0 | 0 | 0 | 0 | 0 | 0 | 0 | 0 | 0 | 0 | 0 | 0 | 0 | 1 | tentative ilicicolin H and asochlorin                                                                                                |
| CF-278800 | <i>Dothiorella sp.</i>          | 0 | 0 | 0 | 0 | 0 | 0 | 0 | 0 | 0 | 0 | 0 | 0 | 0 | 0 | 1 | 4-Hydroxymellein                                                                                                                     |
| CF-285741 | <i>Neomicrosphaeropsis sp.</i>  | 0 | 0 | 0 | 0 | 0 | 0 | 0 | 0 | 0 | 0 | 0 | 0 | 0 | 0 | 1 | phomasetin                                                                                                                           |
| CF-285749 | <i>Paradendryphiella salina</i> | 0 | 0 | 0 | 0 | 0 | 0 | 0 | 0 | 0 | 0 | 0 | 0 | 0 | 0 | 1 | waol A                                                                                                                               |
| CF-287476 | <i>Fusarium sp.</i>             | 0 | 0 | 0 | 0 | 0 | 0 | 0 | 0 | 0 | 0 | 0 | 0 | 0 | 0 | 1 | fusaric acid, 3-Hydroxymellein                                                                                                       |
| CF-288910 | <i>Aureobasidium pullulans</i>  | 0 | 0 | 0 | 0 | 0 | 0 | 0 | 0 | 0 | 0 | 0 | 0 | 0 | 0 | 1 | C <sub>26</sub> H <sub>43</sub> NO <sub>6</sub> and C <sub>20</sub> H <sub>38</sub> O <sub>7</sub> (previously described in plants)  |
| CF-285750 | <i>Cryptococcus sp.</i>         | 0 | 0 | 0 | 0 | 0 | 1 | 0 | 0 | 0 | 0 | 0 | 0 | 0 | 0 | 0 | lovastatin acid                                                                                                                      |
| CF-285759 | <i>Entodesmium sp.</i>          | 0 | 0 | 0 | 0 | 0 | 1 | 0 | 0 | 0 | 0 | 0 | 0 | 0 | 0 | 0 | pycnidione, C <sub>33</sub> H <sub>40</sub> O <sub>7</sub> (no match in DNP)                                                         |
| CF-285364 | <i>Pleiochaeta sp.</i>          | 0 | 0 | 0 | 0 | 0 | 1 | 0 | 0 | 0 | 0 | 0 | 0 | 0 | 0 | 0 | phomasetin                                                                                                                           |
| CF-090228 | <i>Neoamarosporium sp.</i>      | 0 | 0 | 0 | 0 | 0 | 1 | 0 | 0 | 0 | 0 | 0 | 0 | 0 | 0 | 0 | phomasetin                                                                                                                           |
| CF-285758 | <i>Ascochyta sp.</i>            | 0 | 0 | 0 | 0 | 0 | 1 | 0 | 0 | 0 | 0 | 0 | 0 | 0 | 0 | 0 | emodin, possible pestalamide A, C <sub>22</sub> H <sub>21</sub> O <sub>8</sub> (no match in DNP)                                     |
| CF-288957 | <i>Xenodidymella sp.</i>        | 0 | 0 | 0 | 0 | 0 | 1 | 0 | 0 | 0 | 0 | 0 | 0 | 0 | 0 | 0 | hormonemate, C <sub>30</sub> H <sub>54</sub> O <sub>14</sub> (no match in DNP)                                                       |
| CF-285350 | <i>Camarosporium sp.</i>        | 1 | 0 | 0 | 0 | 0 | 0 | 0 | 0 | 0 | 0 | 0 | 0 | 0 | 0 | 0 | C <sub>17</sub> H <sub>31</sub> NO <sub>3</sub> and C <sub>16</sub> H <sub>29</sub> NO <sub>4</sub> (previously described in plants) |
| CF-285357 | <i>Preussia similis</i>         | 1 | 0 | 0 | 0 | 0 | 0 | 0 | 0 | 0 | 0 | 0 | 0 | 0 | 0 | 0 | pleofungin A                                                                                                                         |
| CF-285375 | <i>Preussia australis</i>       | 1 | 0 | 0 | 0 | 0 | 0 | 0 | 0 | 0 | 0 | 0 | 0 | 0 | 0 | 0 | C <sub>18</sub> H <sub>33</sub> NO (previously described in plants)                                                                  |
| CF-285376 | <i>Basifimbria sp.</i>          | 1 | 0 | 0 | 0 | 0 | 0 | 0 | 0 | 0 | 0 | 0 | 0 | 0 | 0 | 0 | cyclo (phenylalanylprolyl)                                                                                                           |
| CF-285755 | <i>Pseudodiplodia ruticola</i>  | 1 | 0 | 0 | 0 | 0 | 0 | 0 | 0 | 0 | 0 | 0 | 0 | 0 | 0 | 0 | possible 6-methyl-9-heptadecenoic acid, C <sub>22</sub> H <sub>24</sub> O <sub>11</sub> S (no match in DNP)                          |
| CF-287456 | <i>Teratosphaeria sp.</i>       | 0 | 0 | 0 | 0 | 0 | 0 | 0 | 0 | 0 | 0 | 1 | 0 | 0 | 0 | 0 | 3-indolylacetic acid                                                                                                                 |
| CF-090284 | <i>Neoamarosporium sp.</i>      | 0 | 0 | 0 | 0 | 0 | 0 | 0 | 0 | 0 | 0 | 1 | 0 | 0 | 0 | 0 | leptosphaerodione                                                                                                                    |
| CF-091947 | <i>Phoma sp.</i>                | 0 | 0 | 0 | 0 | 0 | 0 | 0 | 0 | 0 | 0 | 1 | 0 | 0 | 0 | 0 | massarigenin A, hormonemate                                                                                                          |
| CF-285378 | <i>Preussia sp.</i>             | 0 | 0 | 0 | 0 | 0 | 0 | 0 | 0 | 0 | 0 | 1 | 0 | 0 | 0 | 0 | C <sub>21</sub> H <sub>33</sub> N <sub>5</sub> O <sub>2</sub> (previously described in plants)                                       |
| CF-285751 | <i>Septoria sp.</i>             | 0 | 0 | 0 | 0 | 0 | 0 | 0 | 0 | 0 | 0 | 1 | 0 | 0 | 0 | 0 | C <sub>26</sub> H <sub>43</sub> NO <sub>6</sub> and C <sub>27</sub> H <sub>45</sub> NO <sub>6</sub> (previously described in plants) |
| CF-285760 | <i>Cryptococcus sp.</i>         | 0 | 0 | 0 | 0 | 0 | 0 | 0 | 0 | 0 | 0 | 1 | 0 | 0 | 0 | 0 | C <sub>18</sub> H <sub>32</sub> N <sub>8</sub> O <sub>10</sub> (no match in DNP)                                                     |
| CF-285765 | <i>Paraconiothyrium sp.</i>     | 0 | 0 | 0 | 0 | 0 | 0 | 0 | 0 | 0 | 0 | 1 | 0 | 0 | 0 | 0 | C <sub>36</sub> H <sub>22</sub> O <sub>6</sub> (no match in DNP)                                                                     |
| CF-285774 | <i>Selenophoma juncea</i>       | 0 | 0 | 0 | 0 | 0 | 0 | 0 | 0 | 0 | 0 | 1 | 0 | 0 | 0 | 0 | possible phomtone, nortenuazonic acid                                                                                                |
| CF-285777 | <i>Dothiorella sp.</i>          | 0 | 0 | 0 | 0 | 0 | 0 | 0 | 0 | 0 | 0 | 1 | 0 | 0 | 0 | 0 | dechlorogriseofulvin, griseofulvin                                                                                                   |
| CF-285772 | <i>Preussia sp.</i>             | 0 | 0 | 0 | 0 | 0 | 0 | 1 | 0 | 0 | 0 | 0 | 0 | 0 | 0 | 0 | di-hydro-bi-chloro-geodin, asteric acid                                                                                              |
| CF-285773 | <i>Preussia sp.</i>             | 0 | 1 | 0 | 0 | 0 | 0 | 0 | 0 | 0 | 0 | 0 | 0 | 0 | 0 | 0 | cerulenin analog, asteric acid, C <sub>18</sub> H <sub>32</sub> N <sub>8</sub> O <sub>10</sub> (No match in DNP)                     |
| CF-090317 | <i>Selenophoma sp.</i>          | 0 | 1 | 0 | 0 | 0 | 0 | 0 | 0 | 0 | 0 | 0 | 0 | 0 | 0 | 0 | C <sub>26</sub> H <sub>43</sub> NO <sub>6</sub> (previously described in plants), cyclo(phenylalanylprolyl)                          |
| CF-288939 | <i>Alternaria sp.</i>           | 0 | 0 | 0 | 0 | 0 | 0 | 0 | 0 | 0 | 0 | 0 | 1 | 0 | 0 | 0 | nortenuazonic and tenuazonic acid                                                                                                    |
| CF-288959 | <i>Tamaricicola sp.</i>         | 0 | 0 | 0 | 0 | 0 | 0 | 0 | 0 | 0 | 0 | 0 | 1 | 0 | 0 | 0 | cyclo (phenylalanylprolyl), possible phenopyrrozin                                                                                   |
| CF-092176 | <i>Libertasomyces sp.</i>       | 0 | 0 | 0 | 0 | 0 | 0 | 0 | 1 | 0 | 0 | 0 | 0 | 0 | 0 | 0 | possible naematolin, C <sub>24</sub> H <sub>30</sub> O <sub>5</sub>                                                                  |
| CF-282335 | <i>Homortomyces tamaricis</i>   | 0 | 0 | 0 | 0 | 0 | 0 | 0 | 1 | 0 | 0 | 0 | 0 | 0 | 0 | 0 | cephalochromin, TAN 2483 A and B                                                                                                     |
| CF-090258 | <i>Stagnospora sp.</i>          | 0 | 0 | 1 | 0 | 0 | 0 | 0 | 0 | 0 | 0 | 0 | 0 | 0 | 0 | 0 | secalonic acid C, 11,12-dihydroxyeudem-4-en-3-one, iludinic acid                                                                     |

|              |                                   |    |   |    |   |    |    |   |    |   |    |    |   |    |    |    |                                                                                                             |
|--------------|-----------------------------------|----|---|----|---|----|----|---|----|---|----|----|---|----|----|----|-------------------------------------------------------------------------------------------------------------|
| CF-279249    | <i>Cainia</i> sp.                 | 0  | 0 | 1  | 0 | 0  | 0  | 0 | 0  | 0 | 0  | 0  | 0 | 0  | 0  | 0  | cyclo (phenylalanylprolyl)                                                                                  |
| CF-285365    | <i>Phoma</i> sp.                  | 0  | 0 | 1  | 0 | 0  | 0  | 0 | 0  | 0 | 0  | 0  | 0 | 0  | 0  | 0  | cercosporamide                                                                                              |
| CF-285743    | <i>Epicoccum</i> sp.              | 0  | 0 | 1  | 0 | 0  | 0  | 0 | 0  | 0 | 0  | 0  | 0 | 0  | 0  | 0  | tenuazonic acid, mellein, phomasetin                                                                        |
| CF-285771    | <i>Nigrospora</i> sp.             | 0  | 0 | 1  | 0 | 0  | 0  | 0 | 0  | 0 | 0  | 0  | 0 | 0  | 0  | 0  | possible taurocholic acid                                                                                   |
| CF-287451    | <i>Phoma</i> sp.                  | 0  | 0 | 1  | 0 | 0  | 0  | 0 | 0  | 0 | 0  | 0  | 0 | 0  | 0  | 0  | mycophenolic acid                                                                                           |
| CF-090778    | <i>Stagnospora</i> sp.            | 0  | 0 | 0  | 0 | 0  | 0  | 0 | 0  | 0 | 0  | 0  | 0 | 1  | 0  | 0  | 11,12-dihydroxyeudesm-4-en-3-one, possible gonytolide F                                                     |
| CF-279243    | <i>Leptospora</i> sp.             | 0  | 0 | 0  | 0 | 0  | 0  | 0 | 0  | 0 | 0  | 0  | 0 | 1  | 0  | 0  | possible chrysoxanthone                                                                                     |
| CF-279245    | <i>Pseudopithomyces chartarum</i> | 0  | 0 | 0  | 0 | 0  | 0  | 0 | 0  | 0 | 0  | 0  | 0 | 1  | 0  | 0  | possible antibiotic LL-N 313ε                                                                               |
| CF-285353    | <i>Dothiora</i> sp.               | 0  | 0 | 0  | 0 | 0  | 0  | 0 | 0  | 0 | 0  | 0  | 0 | 1  | 0  | 0  | hormonemate                                                                                                 |
| CF-285371    | <i>Microascus trigonosporus</i>   | 0  | 0 | 0  | 0 | 0  | 0  | 0 | 0  | 0 | 0  | 0  | 0 | 1  | 0  | 0  | petasol                                                                                                     |
| CF-090323    | <i>Phoma</i> sp.                  | 0  | 0 | 0  | 1 | 0  | 0  | 0 | 0  | 0 | 0  | 0  | 0 | 0  | 0  | 0  | antibiotic PF 1163A                                                                                         |
| CF-090387    | <i>Camarosporium</i> sp.          | 0  | 0 | 0  | 1 | 0  | 0  | 0 | 0  | 0 | 0  | 0  | 0 | 0  | 0  | 0  | possible coriolide                                                                                          |
| CF-288938    | <i>Didymella</i> sp.              | 0  | 0 | 0  | 1 | 0  | 0  | 0 | 0  | 0 | 0  | 0  | 0 | 0  | 0  | 0  | cyclo (phenylalanylprolyl), C <sub>39</sub> H <sub>27</sub> NO <sub>8</sub> S (no match in DNP)             |
| CF-282337    | <i>Ascochyta</i> sp.              | 0  | 0 | 0  | 0 | 0  | 0  | 0 | 0  | 0 | 0  | 0  | 0 | 0  | 1  | 0  | possible sequelestatin H1, C <sub>37</sub> H <sub>52</sub> O <sub>15</sub> (previously described in plants) |
| <b>TOTAL</b> |                                   | 17 | 7 | 13 | 6 | 11 | 22 | 9 | 13 | 4 | 26 | 22 | 7 | 13 | 10 | 30 |                                                                                                             |

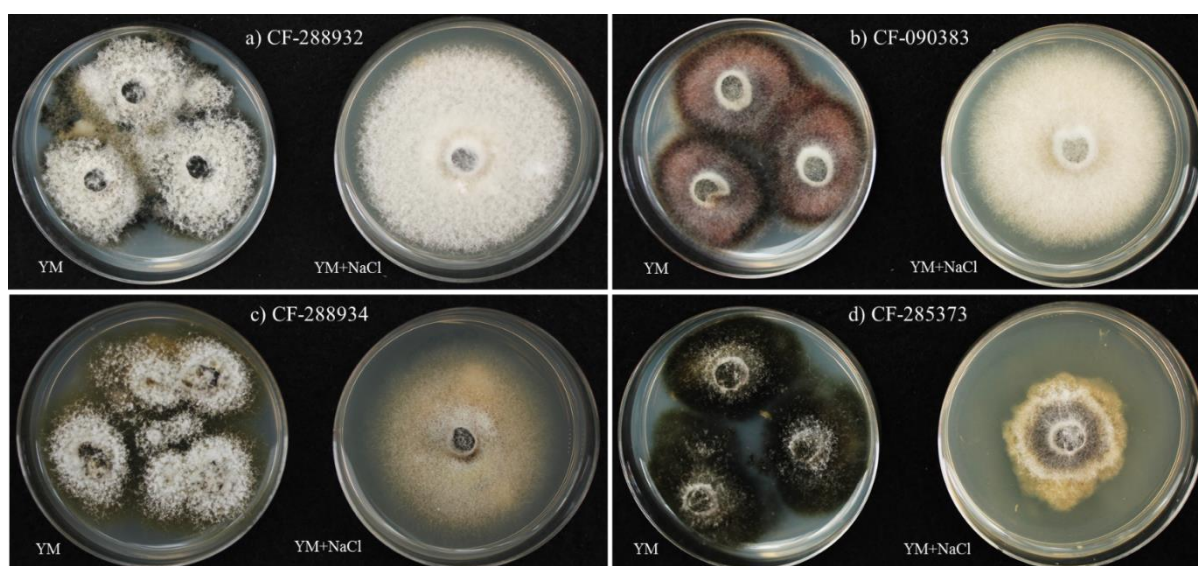

**Supplementary Figure 2 a-d.** Different isolates of *Neocamarosporium* spp grown on yeast malt agar (YM) and yeast malt agar supplemented with NaCl at 3% (YM+NaCl) during 14 days at 22°C and 70% of relative humidity.

**Supplementary Table 4.** List of collected plant specimens.

| Plant Species                     | Collection place                 | Ecology   | Termophile | Xerophile | Gypsophile | Halophile | Salt Tolerant |
|-----------------------------------|----------------------------------|-----------|------------|-----------|------------|-----------|---------------|
| <i>Anabasis articulata</i>        | Tabernas desert (Almeria)        | Desert    | x          | x         |            | x         |               |
| <i>Anthyllis cystisoides</i>      | Sierra de la Alhamilla (Almeria) | Semiarid  | x          |           |            |           |               |
| <i>Anthyllis terniflora</i>       | Tabernas desert (Almeria)        | Desert    | x          | x         |            |           |               |
| <i>Artemisia barrelieri</i>       | Tabernas desert (Almeria)        | Desert    |            | x         |            |           |               |
| <i>Arthrocnemum macrostachyum</i> | Cabo de Gata (Almeria)           | Salt mars | x          | x         |            | x         |               |
| <i>Asparagus horridus</i>         | Tabernas desert (Almeria)        | Desert    | x          | x         |            |           |               |
| <i>Atriplex glauca</i>            | El Margen (Granada)              | Salt mars | x          | x         |            | x         |               |
| <i>Ballota hirsuta</i>            | Sierra de la Alhamilla (Almeria) | Semiarid  |            | x         |            |           |               |
| <i>Beta macrocarpa</i>            | El Margen (Granada)              | Salt mars | x          |           |            | x         |               |
| <i>Centaurea dracunculifolia</i>  | El Margen (Granada)              | Salt mars | x          |           |            | x         |               |
| <i>Chamaerops humilis</i>         | Cabo de Gata (Almeria)           | Salt mars | x          |           |            |           |               |
| <i>Cistus albidus</i>             | Sierra de la Alhamilla (Almeria) | Semiarid  |            | x         |            |           |               |
| <i>Cynanchum acutum</i>           | El Margen (Granada)              | Salt mars | x          |           |            | x         |               |
| <i>Dittrichia viscosa</i>         | Venta de Fraile (Granada)        | Semiarid  |            |           |            |           |               |
| <i>Dorycnium pentaphyllum</i>     | Punta Entinas (Almeria)          | Semiarid  |            |           |            |           |               |
| <i>Euzygodendron bourgeanum</i>   | Tabernas desert (Almeria)        | Desert    | x          |           |            | x         |               |
| <i>Fagonia cretica</i>            | Tabernas desert (Almeria)        | Desert    | x          |           |            | x         |               |
| <i>Frankenia pulverulenta</i>     | El Margen (Granada)              | Salt mars | x          |           |            | x         |               |
| <i>Frankenia corymbosa</i>        | Tabernas desert (Almeria)        | Desert    | x          |           |            | x         |               |
| <i>Genista umbellata</i>          | Tabernas desert (Almeria)        | Desert    | x          |           |            |           |               |
| <i>Gypsophila tomentosa</i>       | El Margen (Granada)              | Salt mars | x          |           | x          | x         |               |
| <i>Helianthemum almeriense</i>    | Tabernas desert (Almeria)        | Desert    | x          |           |            |           | x             |
| <i>Limbarda crithmoides</i>       | Punta Entinas (Almeria)          | Semiarid  | x          |           |            | x         |               |
| <i>Juniperus oxycedrus</i>        | Alfacar (Granada)                | Semiarid  |            | x         |            |           |               |
| <i>Launaea arborescens</i>        | Tabernas desert (Almeria)        | Desert    | x          | x         |            |           |               |
| <i>Lepidium subulatum</i>         | El Margen (Granada)              | Salt mars |            |           | x          |           |               |
| <i>Limodorum abortivum</i>        | Barranco de los Pinos (Granada)  | Semiarid  | x          |           |            |           |               |
| <i>Limonium insigne</i>           | Tabernas(Almeria)                | Desert    | x          |           |            | x         |               |
| <i>Limonium majus</i>             | El Margen (Granada)              | Salt mars |            |           |            | x         |               |
| <i>Lycium intricatum</i>          | Torre Garcia (Almeria)           | Semiarid  | x          |           |            |           | x             |
| <i>Lygeum spartum</i>             | Tabernas(Almeria)                | Desert    |            | x         |            |           | x             |

|                                                    |                                  |           |   |   |   |
|----------------------------------------------------|----------------------------------|-----------|---|---|---|
| <i>Macrosyringion longiflorum</i>                  | El Margen (Granada)              | Salt mars |   | x |   |
| <i>Moricandia foetida</i>                          | Tabernas (Almeria)               | Desert    | x |   | x |
| <i>Nerium oleander</i>                             | Tabernas (Almeria)               | Desert    | x | x |   |
| <i>Nicotiana glauca</i>                            | Rodalquilar (Almeria)            | Semiarid  | x |   |   |
| <i>Ononis tridentata</i>                           | El Margen (Granada)              | Salt mars |   |   | x |
| <i>Ononis fruticosa</i>                            | El Margen (Granada)              | Salt mars |   | x |   |
| <i>Ononis ramosissima</i>                          | Sierra de la Alhamilla (Almeria) | Semiarid  |   |   | x |
| <i>Opuntia ficus-indica</i>                        | Dilar (Granada)                  | Semiarid  |   | x |   |
| <i>Otanthus maritimus</i>                          | Torre Garcia (Almeria)           | Semiarid  | x |   | x |
| <i>Phragmites australis</i>                        | El Margen (Granada)              | Salt mars | x |   | x |
| <i>Pinus halepensis</i>                            | Sierra de la Alhamilla (Almeria) | Semiarid  | x |   |   |
| <i>Retama sphaerocarpa</i>                         | Tabernas (Almeria)               | Semiarid  | x |   |   |
| <i>Rhamnus lycioides</i>                           | Sierra de la Alhamilla (Almeria) | Semiarid  |   | x |   |
| <i>Rosmarinus eriocalyx</i>                        | Tabernas (Almeria)               | Desert    | x | x |   |
| <i>Salicornia ramossissima</i>                     | Tabernas (Almeria)               | Desert    | x |   | x |
| <i>Salsola genistoides</i>                         | Tabernas (Almeria)               | Desert    |   |   | x |
| <i>Salsola oppositifolia</i>                       | Tabernas (Almeria)               | Desert    |   |   | x |
| <i>Salsola papillosa</i>                           | Tabernas (Almeria)               | Desert    |   |   | x |
| <i>Salsola vermiculata</i>                         | El Margen (Granada)              | Salt mars |   |   | x |
| <i>Sedum sediforme</i>                             | Sierra de la Alhamilla (Almeria) | Semiarid  |   | x |   |
| <i>Sonchus crassifolius</i>                        | El Margen (Granada)              | Salt mars |   |   | x |
| <i>Spartium junceum</i>                            | Fuente de Hervidero (Granada)    | Semiarid  |   | x |   |
| <i>Stipa tenacissima</i>                           | Albuñuelas (Granada)             | Semiarid  |   | x |   |
| <i>Suaeda vera</i>                                 | Tabernas desert (Almeria)        | Desert    |   |   | x |
| <i>Tamarix canariensis</i>                         | Tabernas desert (Almeria)        | Desert    | x | x | x |
| <i>Teucrium capitatum</i> sbsp. <i>gracillimum</i> | El Margen (Granada)              | Salt mars |   | x |   |
| <i>Thymelaea hirsuta</i>                           | Los Almorades (Almeria)          | Semiarid  |   | x |   |
| <i>Thymus hyemalis</i>                             | Tabernas desert (Almeria)        | Desert    | x | x | x |
| <i>Thymus zygis</i> subsp. <i>gracilis</i>         | El Margen (Granada)              | Salt mars |   | x |   |
| <i>Withania frutescens</i>                         | Almerimar (Almeria)              | Semiarid  | x | x | x |
| <i>Ziziphus lotus</i>                              | Torre Garcia (Almeria)           | Semiarid  |   | x | x |
| <i>Zygophyllum fabago</i>                          | Torre Garcia (Almeria)           | Semiarid  | x |   | x |

## Structure elucidation of new natural products

**MDN-0209 (1)** was isolated as a yellow pale oil. A molecular formula of  $C_{17}H_{26}O_4$  was determined from HRESIMS data ( $m/z$  277.1800 ( $[M + H - H_2O]^+$ ; calcd. for  $C_{17}H_{25}O_3^+$ , 277.1798), requiring five double bond equivalents. The  $^1H$ ,  $^{13}C$ -NMR and (**Table S1**) HSQC data, accounted for the presence in the molecule of three double bonds ( $\delta_C$  134.0, C-3;  $\delta_C$  131.5, C-4;  $\delta_H$  5.23,  $\delta_C$  118.8, CH-8;  $\delta_C$  136.2, C-9;  $\delta_H$  6.42,  $\delta_C$  126.9, CH-12;  $\delta_H$  6.08,  $\delta_C$  134.9, C-13). Two allylic methylenes ( $\delta_H$  2.83 and 2.37,  $\delta_C$  30.9, CH<sub>2</sub>-7;  $\delta_H$  2.15,  $\delta_C$  36.6, CH<sub>2</sub>-14), one aliphatic triplet methyl group ( $\delta_H$  0.94,  $\delta_C$  14.0, CH<sub>3</sub>-16), two allylic singlet methyls ( $\delta_H$  1.67,  $\delta_C$  18.1, CH<sub>3</sub>-10;  $\delta_H$  1.74,  $\delta_C$  26.0, CH<sub>3</sub>-11) and one aliphatic methylenes ( $\delta_H$  1.47,  $\delta_C$  23.5, CH<sub>2</sub>-15) were also observed. Additionally, several oxygenated carbons were present in the molecule: one quaternary carbon ( $\delta_C$  61.1, C-1), three methines ( $\delta_H$  4.43,  $\delta_C$  67.6, CH-2;  $\delta_H$  4.61,  $\delta_C$  65.2, CH-5;  $\delta_H$  3.21,  $\delta_C$  59.5, CH-6) and one methylene ( $\delta_H$  4.39 and 4.15,  $\delta_C$  59.9, CH<sub>2</sub>-17). COSY (**Figure S1**) and HMBC (**Figure S2**) spectra helped to construct the planar structure, which contained one epoxide and one six carbons ring, completing the total number of unsaturations. The presence of the epoxide was justified by the shielded chemical shift of carbons C-1 and C-6 respect to the rest of oxygenated carbons. An *E* configuration was proposed for the double bond C-12/C-13 based on the value of the H-12/H-13 coupling constant ( $J = 15.7$  Hz). The NOESY interactions observed between protons H-7 and H-10, and those between H-8 and H-11 secured the identity of the two allylic methyl groups. The relative configuration around the six members ring was supported by key NOESY correlations between protons H-2, H<sub>2</sub>-7 and H-6, indicating that all of them are on the same face of the molecule. Finally, the absolute configuration at C-2 and C-5 was determined applying the modified Mosher's method (1) to the R- and S-MTPA esters of both secondary hydroxyl groups. Although the  $^1H$  gave an irregular distribution of  $\Delta\delta^{SR}$  values, the configuration could eventually be determined by analysis of the  $\Delta\delta^{SR}$  distribution for the  $^{13}C$  signal (**Figure S10**), indicating an *S* configuration in both centers.

**MDN-0210 (2)** was isolated as a brown pale oil. A molecular formula of  $C_{17}H_{24}O_4$  was determined from HRESIMS ( $m/z$  293.1747 ( $[M + H]^+$ ; calcd. for  $C_{17}H_{25}O_4^+$ , 293.1747), requiring six degrees of unsaturation. Two protons less in the molecular formula of **2** with respect to **1** and the analysis of the  $^1H$  and  $^{13}C$ -NMR spectra (**Table S1**) indicated that the hydroxyl group at C-5 in **1** was oxidized to a carbonyl group in **2**. The HMBC correlation between H-6 ( $\delta_H$  3.30) and C-5 ( $\delta_C$  198.1) supported this change (**Figure S12**). The rest of the planar structure was confirmed by COSY (**Figure S11**) and HMBC spectra, and proved to be similar to compound **1**. On the other hand, the NOESY interactions observed between protons 2, 7 and 6 supported the relative configuration proposed and the absolute configuration was assumed to be the same as in compound **1**.

**MDN-0211 (3)** was isolated as a white amorphous solid. Its HRESIMS analysis gave a molecular ion a  $m/z$  235.0574 ( $[M + Na]^+$ ; calcd. for  $C_{10}H_{12}NaO_5^+$ , 235.0577), which was consistent with the molecular formula  $C_{10}H_{12}O_5$ , requiring five double bond equivalents. The  $^1H$  and  $^{13}C$ -NMR spectra (**Table S2**) showed signals for two methoxy groups ( $\delta_H$  3.81,  $\delta_C$  56.6,  $CH_3$ -9;  $\delta_H$  3.88,  $\delta_C$  57.1,  $CH_3$ -10), one oxygenated methylene ( $\delta_H$  5.06 and 4.42,  $\delta_C$  71.5,  $CH_2$ -8), one double oxygenated methine ( $\delta_H$  6.12,  $\delta_C$  107.6,  $CH$ -1) and one aromatic ring ( $\delta_H$  6.57,  $\delta_C$  98.1,  $CH$ -4;  $\delta_C$  118.6, C-2;  $\delta_C$  149.6, C-3;  $\delta_C$  150.7, C-5;  $\delta_C$  135.1, C-6;  $\delta_C$  129.5, C-7). The analysis of HMBC spectrum (**Figure S20**) determined the connectivity of these units. The methoxy protons of  $OCH_3$ -9 and  $OCH_3$ -10 had an HMBC correlation to C-3 and C-5, respectively, on the aromatic moiety. HMBC correlations from H-8 to C-1 and from H-1 to C-8 and the chemical shift of these hydrogen and carbon atoms in the  $^1H$  and  $^{13}C$  NMR spectra secured the presence of an oxygen bridge between both carbon atoms and hence of a heteroaromatic ring in the structure of **3**. Finally, the chemical shift of C-6 ( $\delta_C$  135.1) was indicative of the presence of a hydroxyl group at this carbon, completing the initially determined chemical formula. The absence of specific rotation in the sample confirmed the existence of a mixture of enantiomers in this sample. Most probably, compound **3** is formed by nucleophilic attack of a primary hydroxyl group at C-8 to an aldehyde carbonyl group at C-1 equally favored in both faces of the carbonyl group.

**MDN-0209**: pale yellow oil;  $[\alpha]_D^{26}$  -48.22 (c 0.19 w/v%, CH<sub>2</sub>Cl<sub>2</sub>); UV (DAD)  $\lambda_{\max}$  240 nm; IR (ATR)  $\nu$  cm<sup>-1</sup>: 3357, 3041, 2959, 2927, 2872, 2728, 1671, 1453, 1377, 1263, 1143, 1089, 1005, 963, 841. HRMS  $m/z$  277.1800 [M+H-H<sub>2</sub>O]<sup>+</sup> (calcd. for C<sub>17</sub>H<sub>25</sub>O<sub>3</sub><sup>+</sup>, 277.1798); 312.2171 [M+NH<sub>4</sub>]<sup>+</sup> (calcd. for C<sub>17</sub>H<sub>30</sub>NO<sub>4</sub><sup>+</sup>, 312.2169); 611.3555 [2M+Na]<sup>+</sup> (calcd. for C<sub>34</sub>H<sub>52</sub>NaO<sub>8</sub><sup>+</sup>, 611.3554); for <sup>1</sup>H and <sup>13</sup>C NMR data, see Table S1.

**Table S1. <sup>1</sup>H (500 MHz) and <sup>13</sup>C (125 MHz) NMR Data for Compounds 1 and 2 in CD<sub>3</sub>OD**

| Position | <b>1</b>              |                                      | <b>2</b>              |                                      |
|----------|-----------------------|--------------------------------------|-----------------------|--------------------------------------|
|          | $\delta_C$ , type     | $\delta_H$ , mult. ( <i>J</i> in Hz) | $\delta_C$ , type     | $\delta_H$ , mult. ( <i>J</i> in Hz) |
| 1        | 61.1, C               |                                      | 66.2, C               |                                      |
| 2        | 67.6, CH              | 4.43, s                              | 66.7, CH              | 4.77, s                              |
| 3        | 134.0, C              |                                      | 151.1, C              |                                      |
| 4        | 131.5, C              |                                      | 131.2, C              |                                      |
| 5        | 65.2, CH              | 4.61, s                              | 198.1, C              |                                      |
| 6        | 59.5, CH              | 3.21, br t (1.7)                     | 60.2, CH              | 3.30, s                              |
| 7a       | 30.9, CH <sub>2</sub> | 2.83, dd (15.2, 7.4)                 | 29.9, CH <sub>2</sub> | 2.94, dd (15.4, 7.8)                 |
| 7b       |                       | 2.37, dd (15.2, 7.4)                 |                       | 2.45, dd (15.4, 7.2)                 |
| 8        | 118.9, CH             | 5.23, tt (7.4, 1.4)                  | 118.2, CH             | 5.22, tm (7.5, 1.4)                  |
| 9        | 136.2, C              |                                      | 137.1, C              |                                      |
| 10       | 18.1, CH <sub>3</sub> | 1.67, s                              | 18.0, CH <sub>3</sub> | 1.67, br s                           |
| 11       | 26.0, CH <sub>3</sub> | 1.74, s                              | 25.9, CH <sub>3</sub> | 1.75, br s                           |
| 12       | 126.9, CH             | 6.42, d (15.7)                       | 122.0, CH             | 6.06, m                              |
| 13       | 134.9, CH             | 6.08, dt (15.7, 7.0)                 | 140.1, CH             | 6.05, m                              |
| 14       | 36.6, CH <sub>2</sub> | 2.15, c (7.0)                        | 36.8, CH <sub>2</sub> | 2.14, m                              |
| 15       | 23.5, CH <sub>2</sub> | 1.47, m (7.4)                        | 23.3, CH <sub>2</sub> | 1.46, m (7.3)                        |
| 16       | 14.0, CH <sub>3</sub> | 0.94, t (7.4)                        | 14.0, CH <sub>3</sub> | 0.94, t (7.5)                        |
| 17a      | 59.9, CH <sub>2</sub> | 4.39, d (12.3)                       | 60.4, CH <sub>2</sub> | 4.47, d (13.4)                       |
| 17b      |                       | 4.15, d (12.3)                       |                       | 4.32, d (13.4)                       |

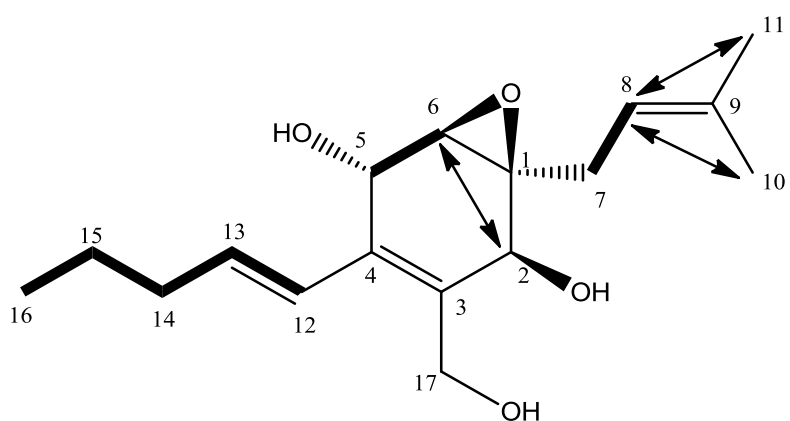

**Figure S1.** Key  $^1\text{H}$ - $^1\text{H}$  COSY (bold lines, along range H $\leftrightarrow$ H) correlations for compound **1**

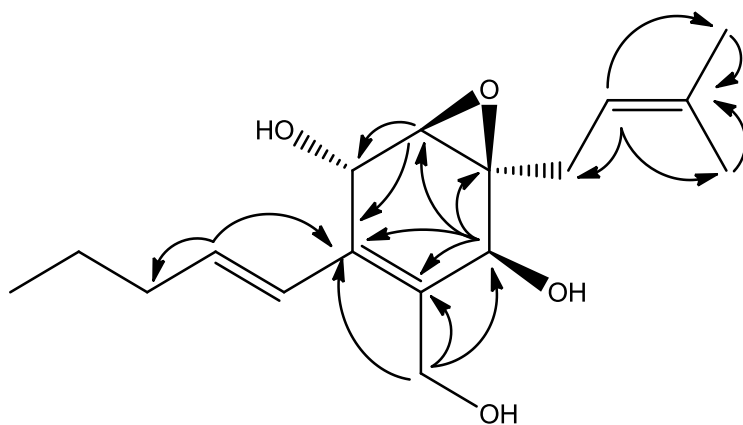

**Figure S2.** Key HMBC (H $\rightarrow$ C) correlations for compound **1**



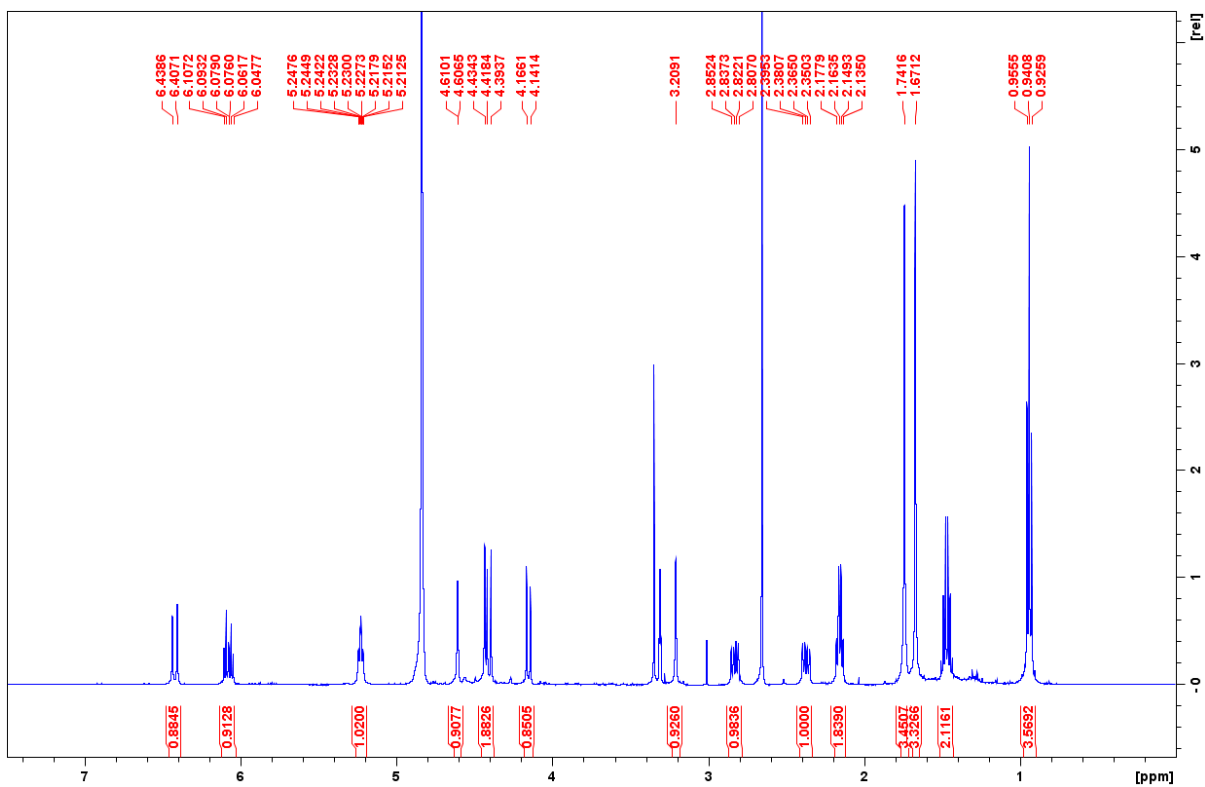

Figure S3.  $^1\text{H}$  NMR spectrum (500MHz) of **1** in  $\text{CD}_3\text{OD}$ .

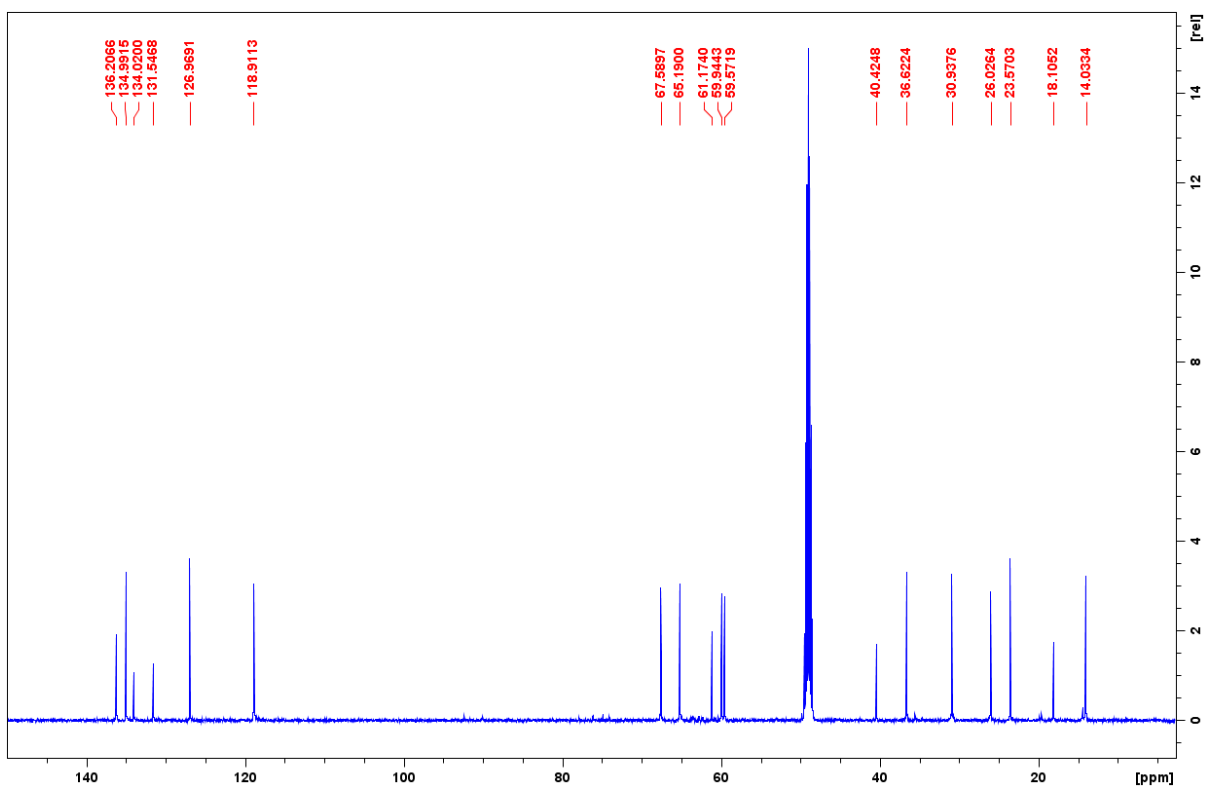

Figure S4.  $^{13}\text{C}$  NMR spectrum (125MHz) of **1** in  $\text{CD}_3\text{OD}$ .

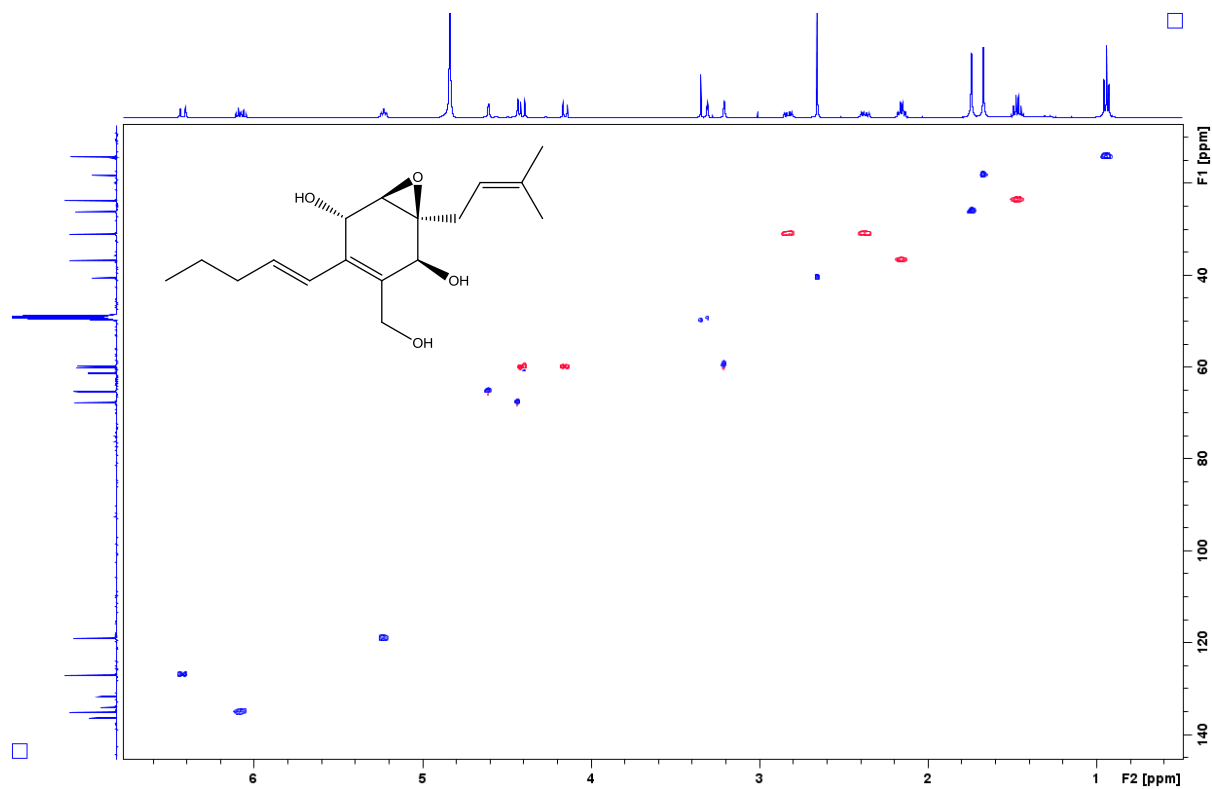

**Figure S5.** HSQC spectrum (500MHz) of **1** in CD<sub>3</sub>OD.

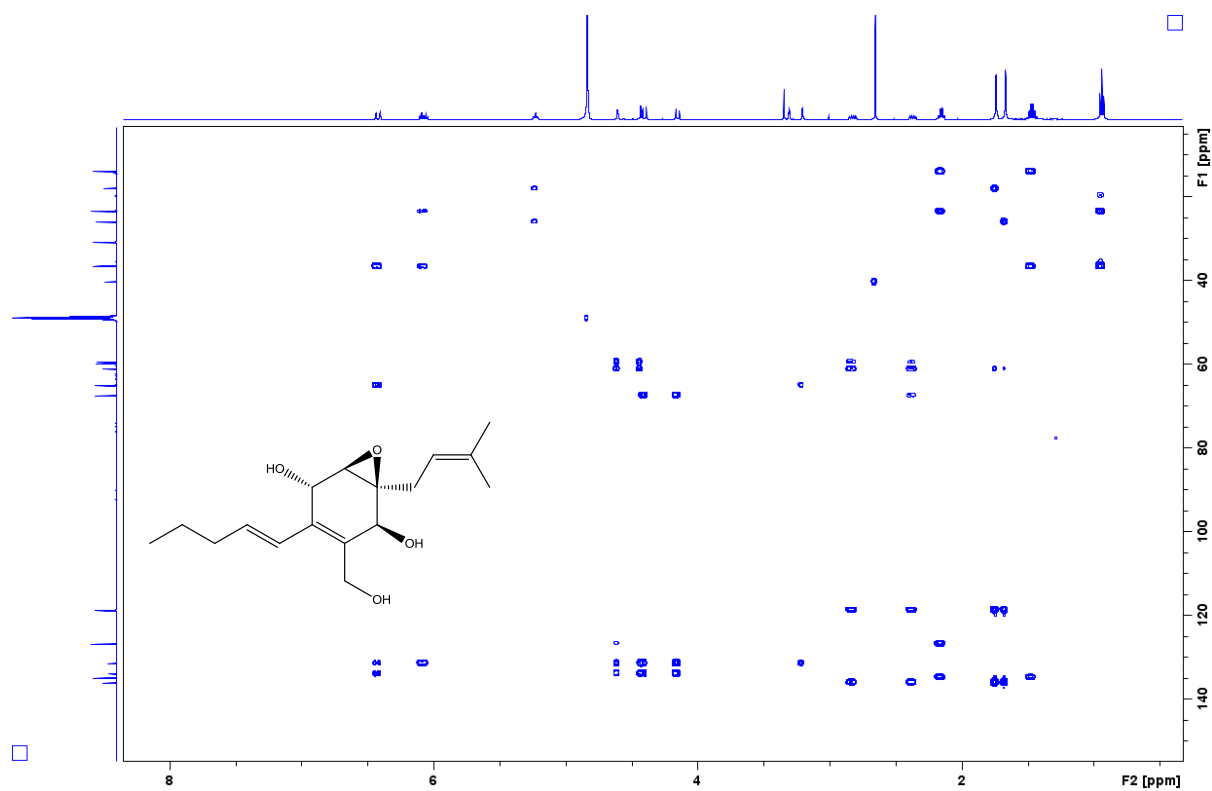

**Figure S6.** HMBC spectrum (500MHz) of **1** in CD<sub>3</sub>OD.

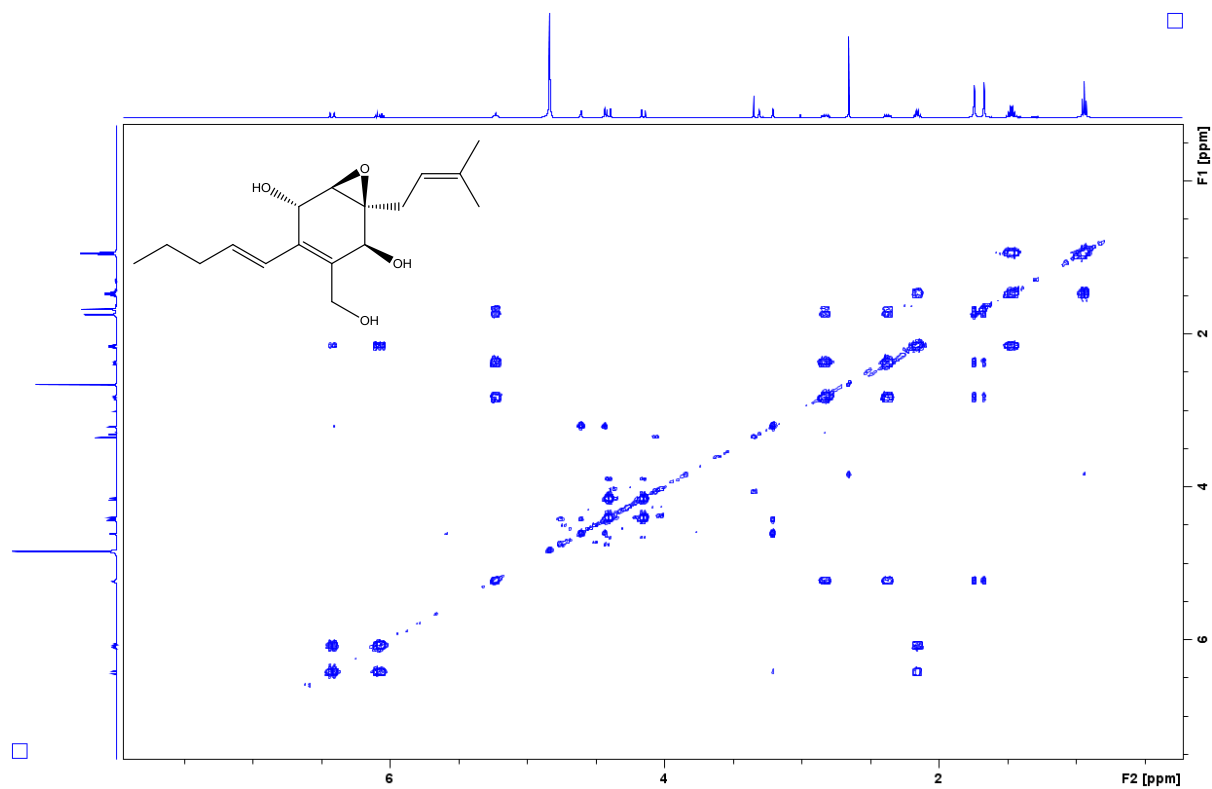

**Figure S7.** COSY spectrum (500MHz) of **1** in CD<sub>3</sub>OD.

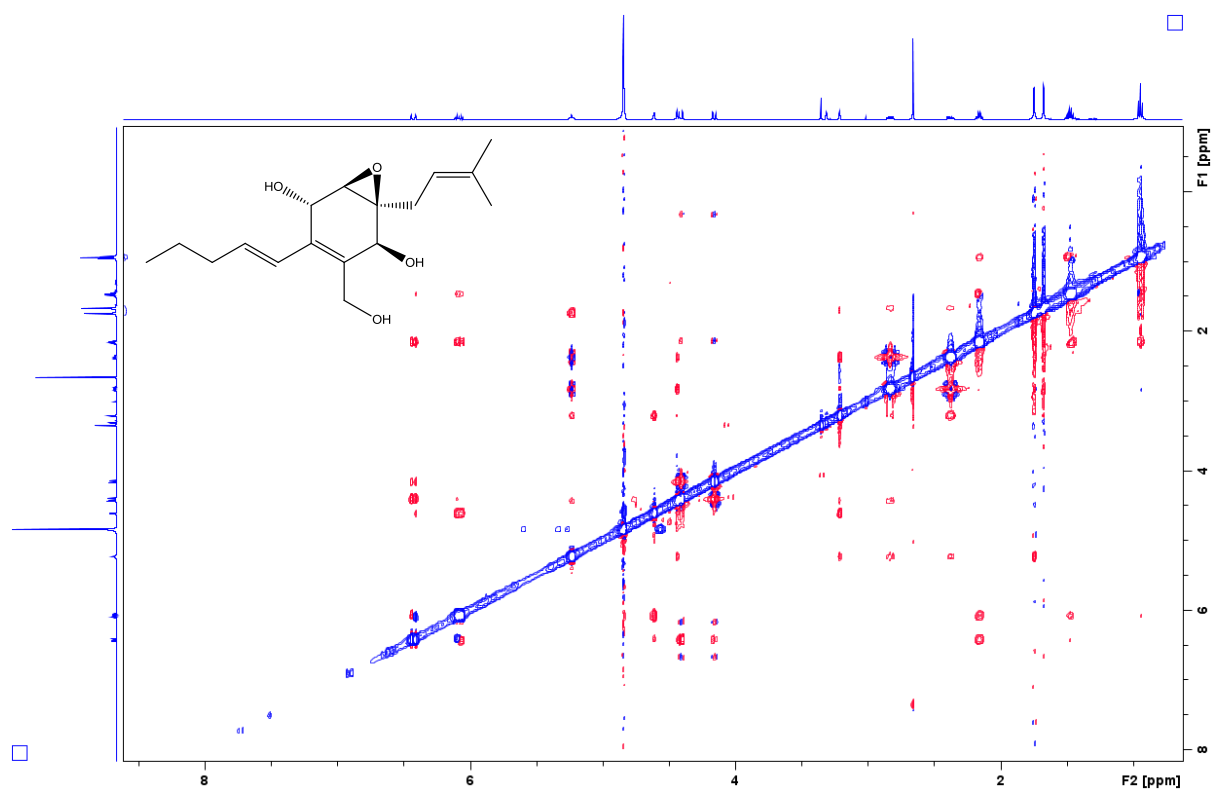

**Figure S8.** NOESY spectrum (500MHz) of **1** in CD<sub>3</sub>OD.

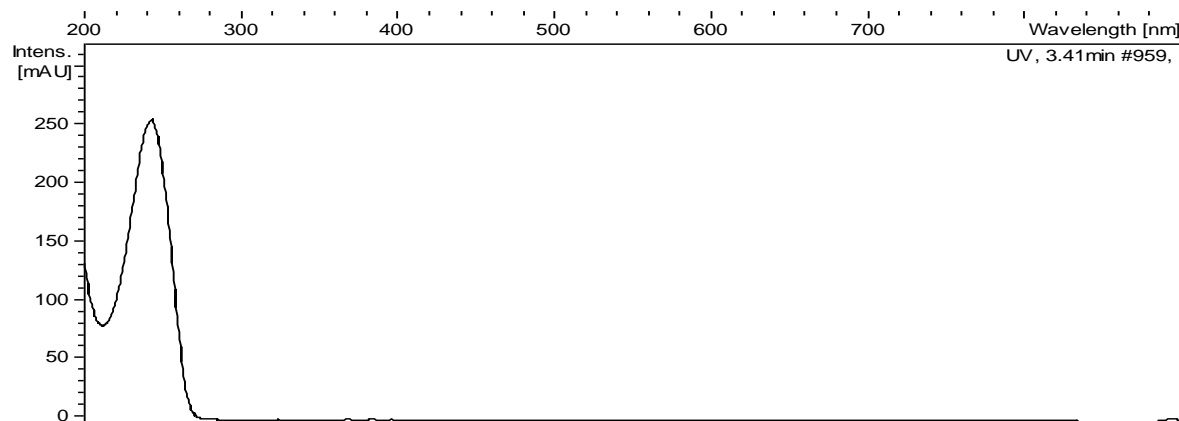

**Figure S9.** UV spectrum of **1**

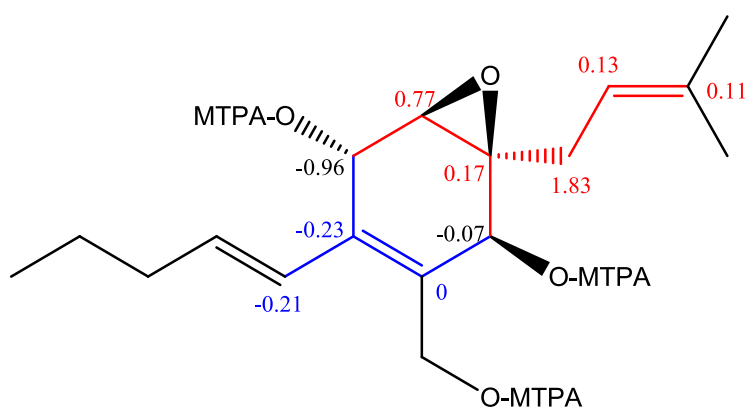

**Figure S10.**  $\Delta\delta^{\text{SR}}$  values of MTPA-esters of compound **1**

**MDN-0210 (2):** White and amorphous solid;  $[\alpha]_D^{26}$  95.62 (c 0.04w/v%,  $\text{CH}_2\text{Cl}_2$ ); UV (DAD)  $\lambda_{\text{max}}$  210nm, 280nm; IR (ATR)  $\nu$   $\text{cm}^{-1}$ : 3420, 2959, 2928, 2872, 1672, 1453, 1377, 1025, 969, 841. HRMS  $m/z$  275.1641  $[\text{M}+\text{H}-\text{H}_2\text{O}]^+$  (calcd. for  $\text{C}_{17}\text{H}_{23}\text{O}_3^+$ , 275.1642); 293.1747  $[\text{M}+\text{H}]^+$  (calcd. for  $\text{C}_{17}\text{H}_{25}\text{O}_4^+$ , 293.1747); 310.2007  $[\text{M}+\text{NH}_4]^+$  (calcd. for  $\text{C}_{17}\text{H}_{28}\text{NO}_4^+$ , 310.2013); 607.3234  $[2\text{M}+\text{Na}]^+$  (calcd. for  $\text{C}_{34}\text{H}_{48}\text{NaO}_8^+$ , 607.3241); for  $^1\text{H}$  and  $^{13}\text{C}$  NMR data, see Table S1.

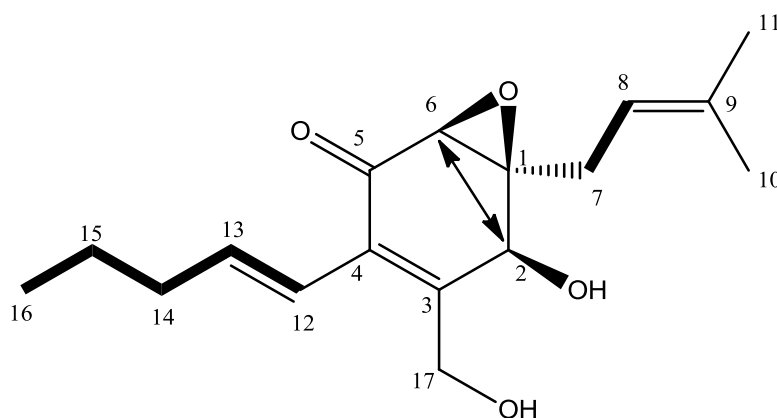

**Figure S11.** Key  $^1\text{H}-^1\text{H}$  COSY (bold lines, and long range  $\text{H}\leftrightarrow\text{H}$ ) correlations for compound **2**.

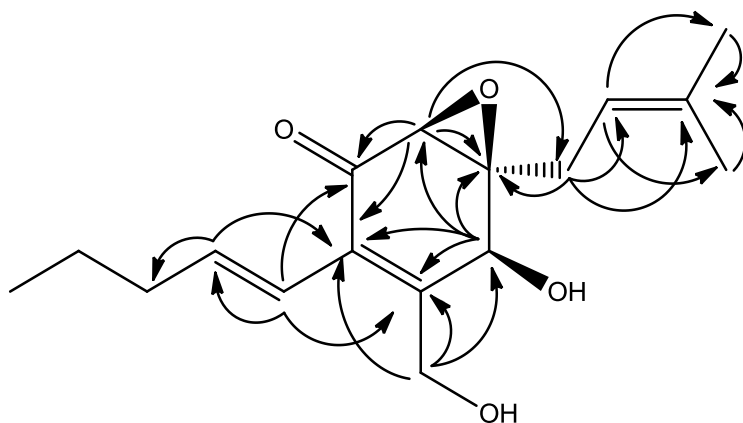

**Figure S12.** Key HMBC (H→C) correlations for compound **2**.

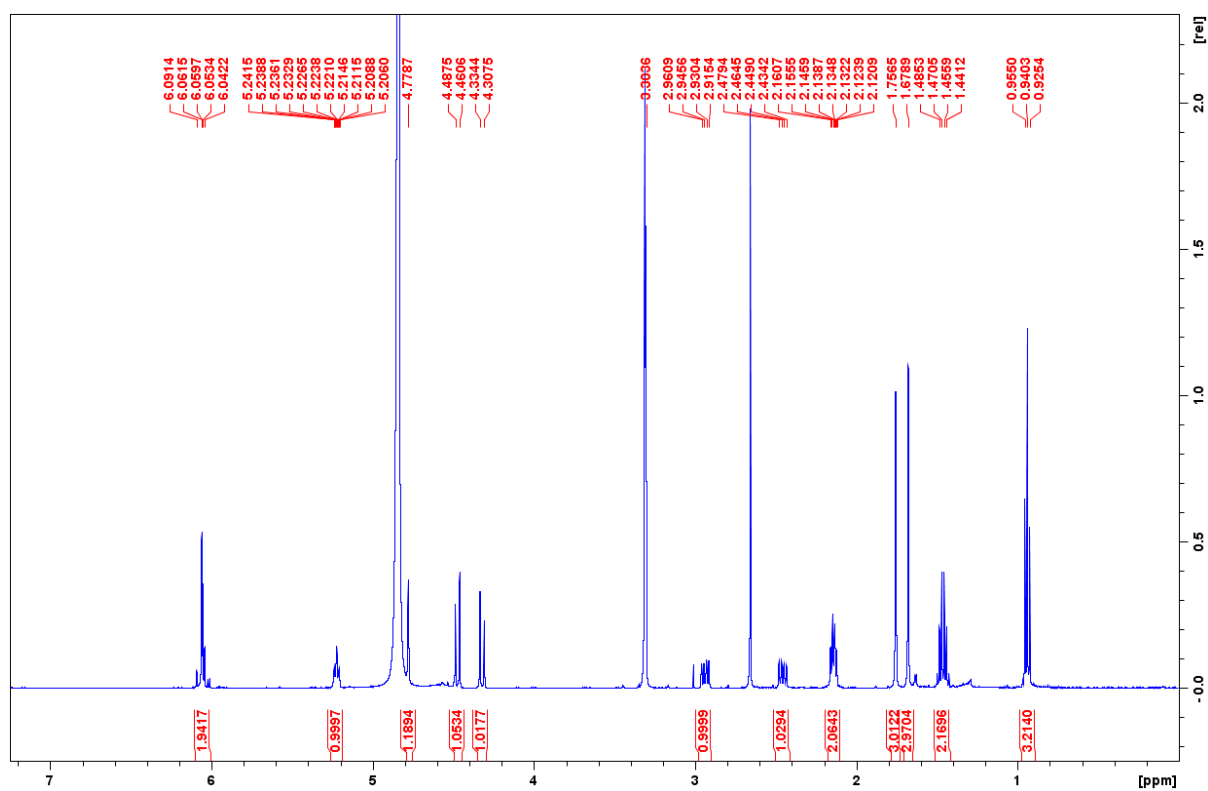

**Figure S13.**  $^1\text{H}$  NMR spectrum (500MHz) of **2** in  $\text{CD}_3\text{OD}$ .

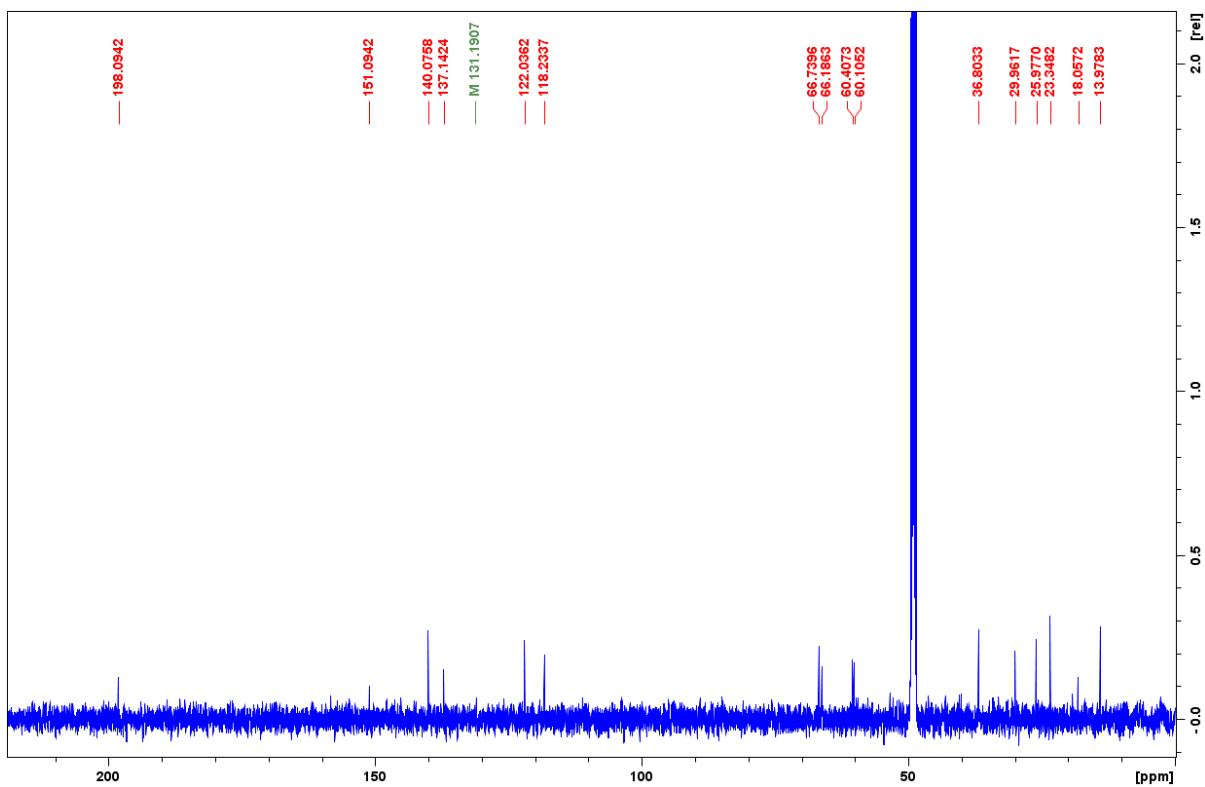

Figure S14.  $^{13}\text{C}$  NMR spectrum (125MHz) of **2** in  $\text{CD}_3\text{OD}$ .

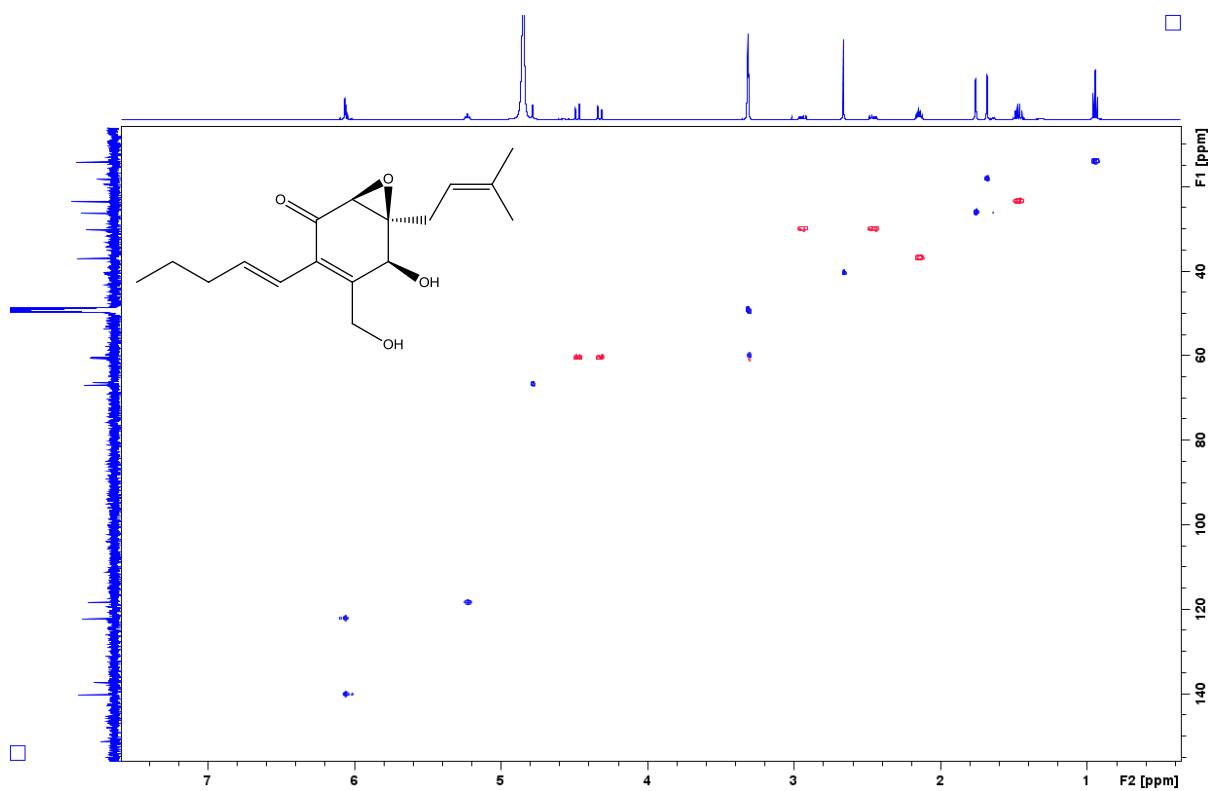

Figure S15. HSQC spectrum (500MHz) of **2** in  $\text{CD}_3\text{OD}$ .

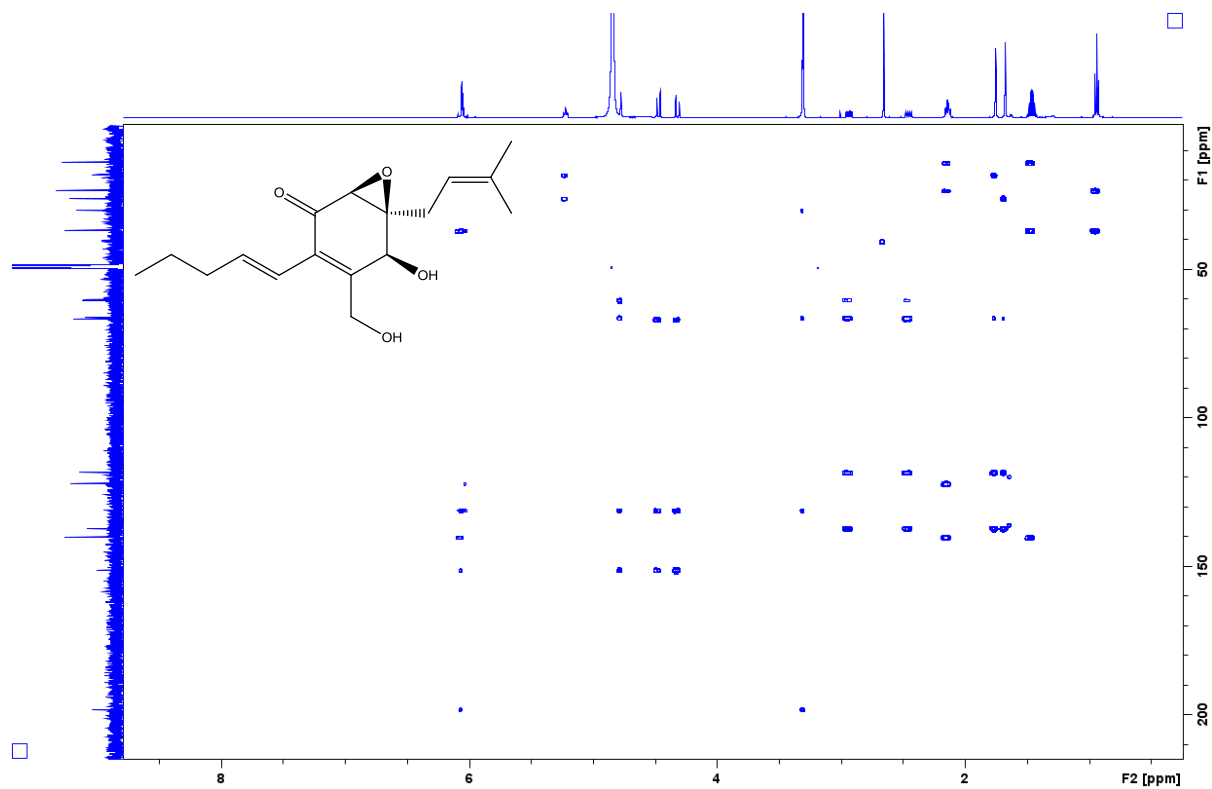

**Figure S16.** HMBC spectrum (500MHz) of **2** in CD<sub>3</sub>OD.

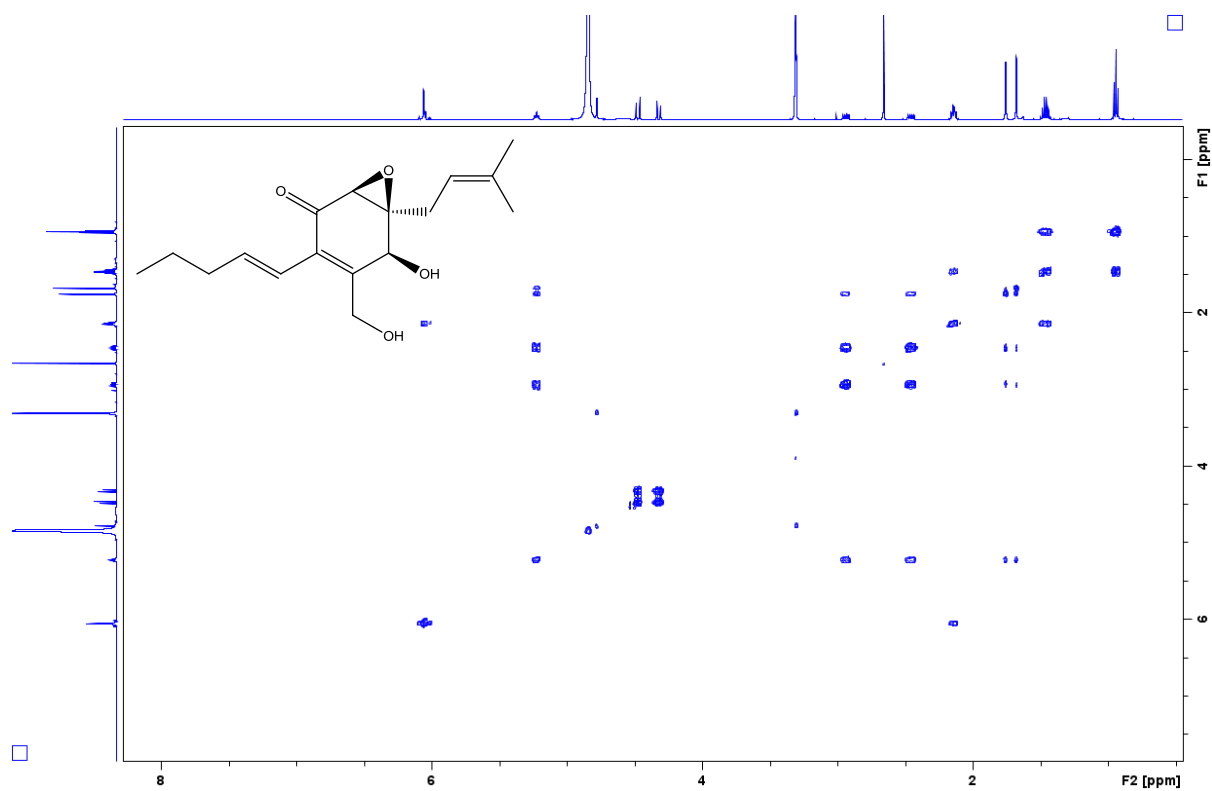

**Figure S17.** COSY spectrum (500MHz) of **2** in CD<sub>3</sub>OD.

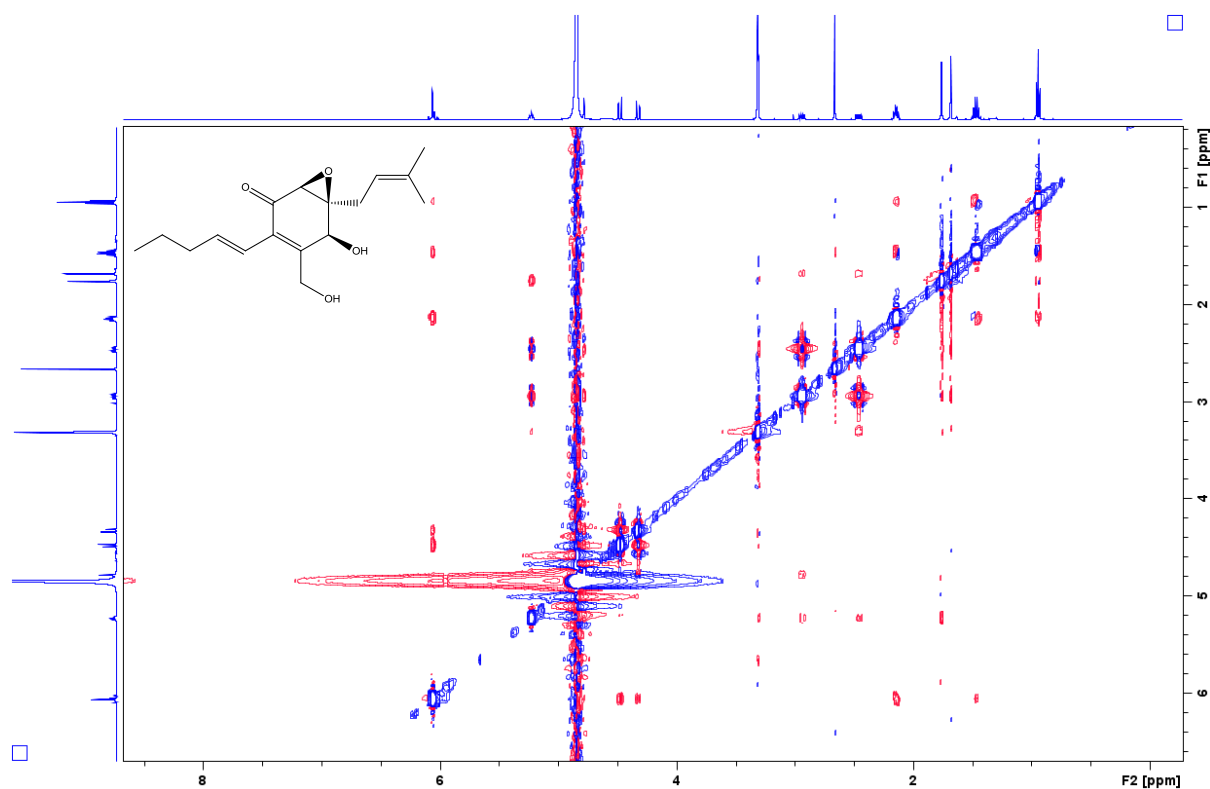

**Figure S18.** NOESY spectrum (500MHz) of **2** in CD<sub>3</sub>OD.

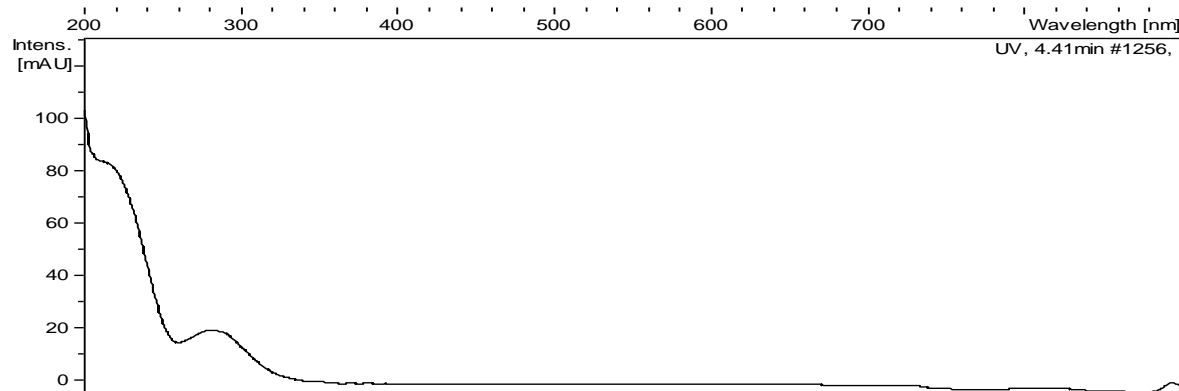

**Figure S19.** UV spectrum of **2**

**MDN-0211 (3):** White and amorphous solid;  $[\alpha]^{25}_D$  0.00 (c 0.16w/v%, CH<sub>3</sub>OH); UV (DAD)  $\lambda_{max}$  230nm, 280nm; IR (ATR)  $\nu$  cm<sup>-1</sup>: 3363, 2943, 2839, 1643, 1505, 1454, 1438, 1245, 1210, 1133, 1086, 1024. HRESIMS  $m/z$  195.0655 [M+H-H<sub>2</sub>O]<sup>+</sup> (calcd. for C<sub>10</sub>H<sub>11</sub>O<sub>4</sub><sup>+</sup>, 195.0652); 235.0574 [M+Na]<sup>+</sup> (calcd. for C<sub>10</sub>H<sub>12</sub>NaO<sub>5</sub><sup>+</sup>, 235.0577); 447.1257 [2M+Na]<sup>+</sup> (calcd. for C<sub>20</sub>H<sub>24</sub>NaO<sub>10</sub><sup>+</sup>, 447.1262); for <sup>1</sup>H and <sup>13</sup>C NMR data, see Table S3:



**Table S3. <sup>1</sup>H (500 MHz) and <sup>13</sup>C (125 MHz) NMR Data for Compound 1 in MeOD**

| Position | $\delta_C$ , type     | $\delta_H$ , mult. ( <i>J</i> in Hz) |
|----------|-----------------------|--------------------------------------|
| 1        | 107.6, CH             | 6.12, d (1.96)                       |
| 2        | 118.6, C              |                                      |
| 3        | 149.6, C              |                                      |
| 4        | 98.1, CH              | 6.57, s                              |
| 5        | 150.7, C              |                                      |
| 6        | 135.1, C              |                                      |
| 7        | 129.5, C              |                                      |
| 8a       | 71.5, CH <sub>2</sub> | 5.06, dd (12.8, 1.48)                |
| 8b       |                       | 4.42, d (12.8)                       |
| 9        | 56.6, CH <sub>3</sub> | 3.81, s                              |
| 10       | 57.1, CH <sub>3</sub> | 3.88, s                              |

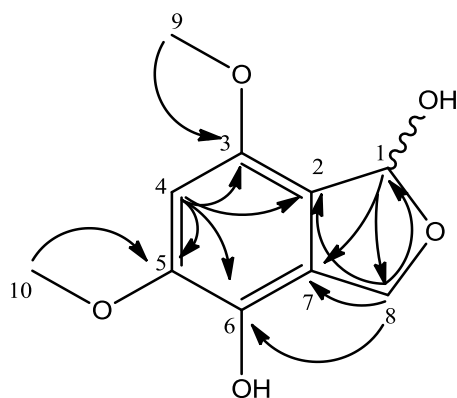

**Figure S20.** Key HMBC (H→C) correlations for compound **3**

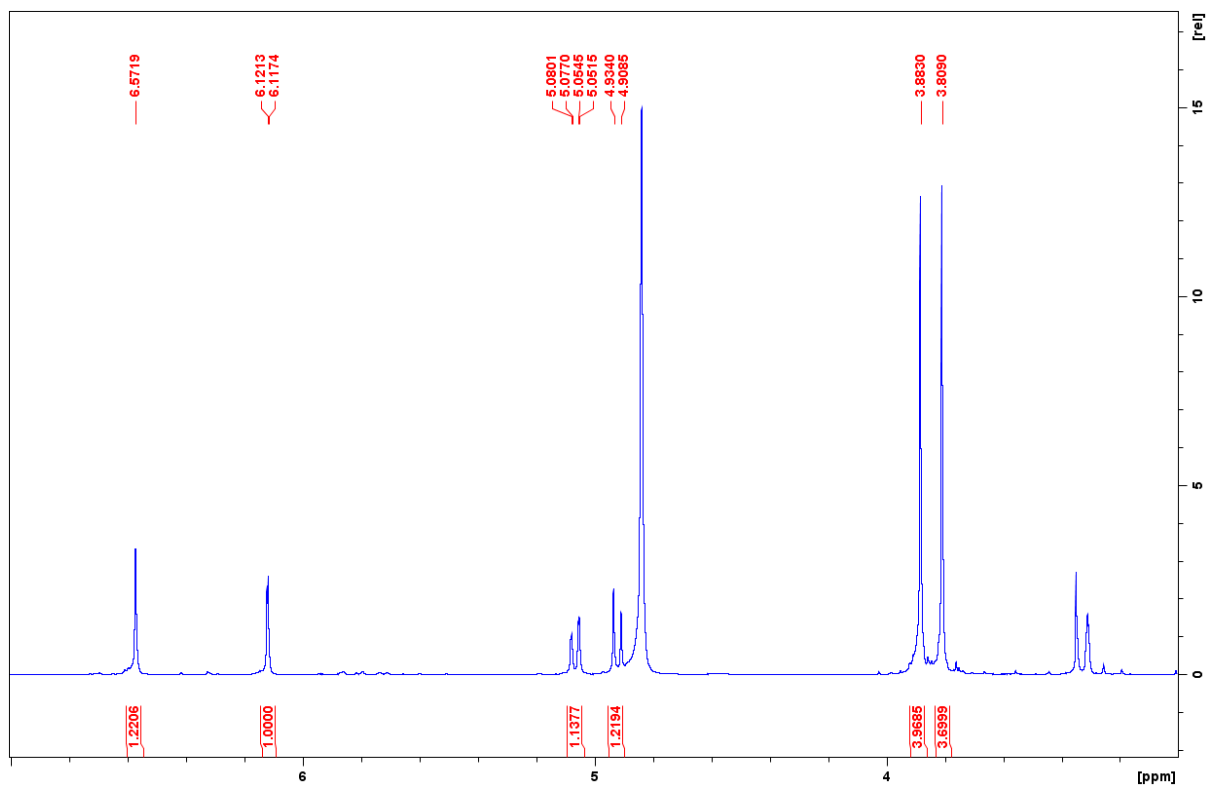

**Figure S21.**  $^1\text{H}$  NMR spectrum (500MHz) of **3** in  $\text{CD}_3\text{OD}$ .

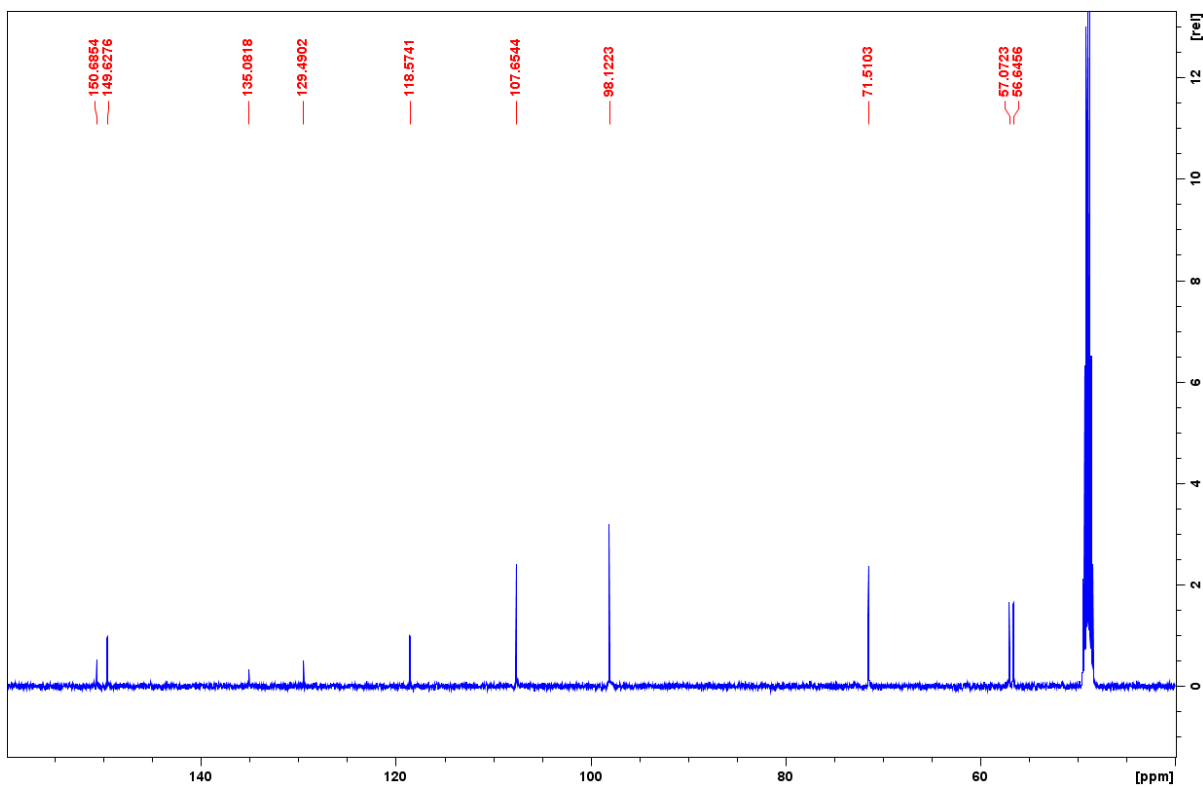

Figure S22.  $^{13}\text{C}$  NMR spectrum (125MHz) of **3** in  $\text{CD}_3\text{OD}$ .

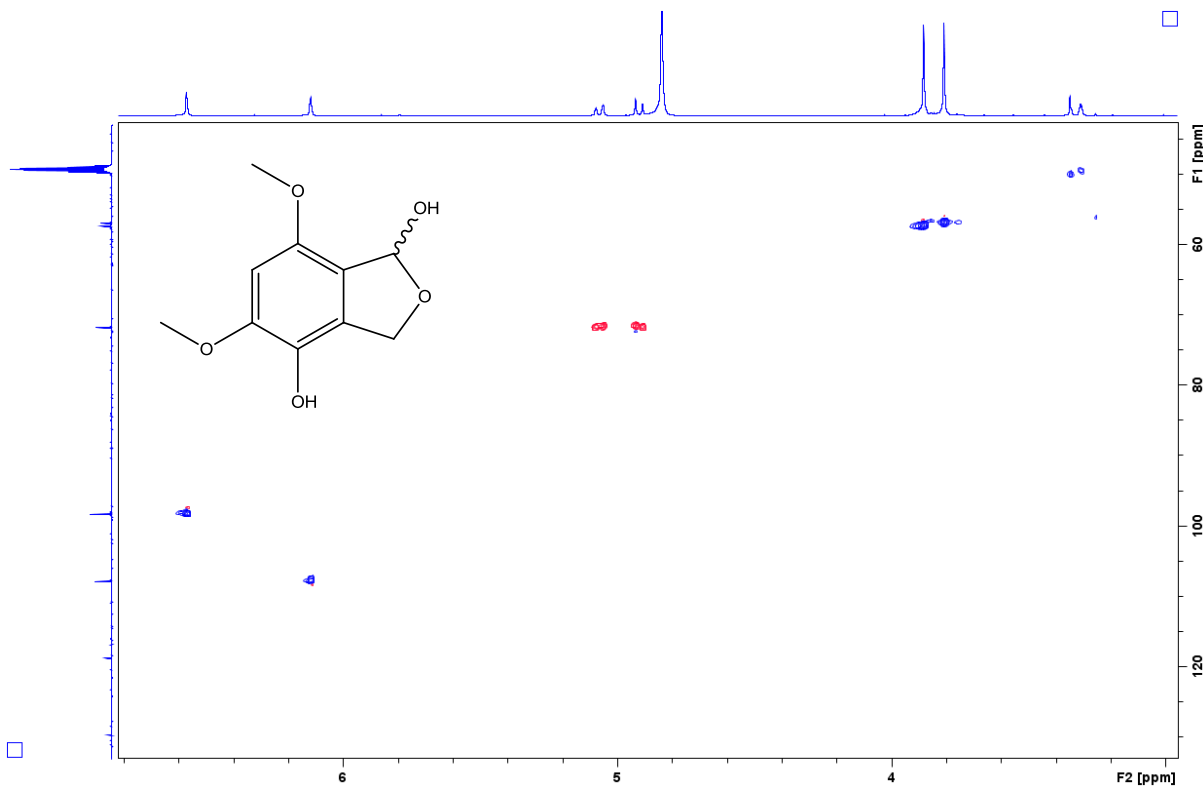

Figure S23. HSQC spectrum (500MHz) of **3** in  $\text{CD}_3\text{OD}$ .

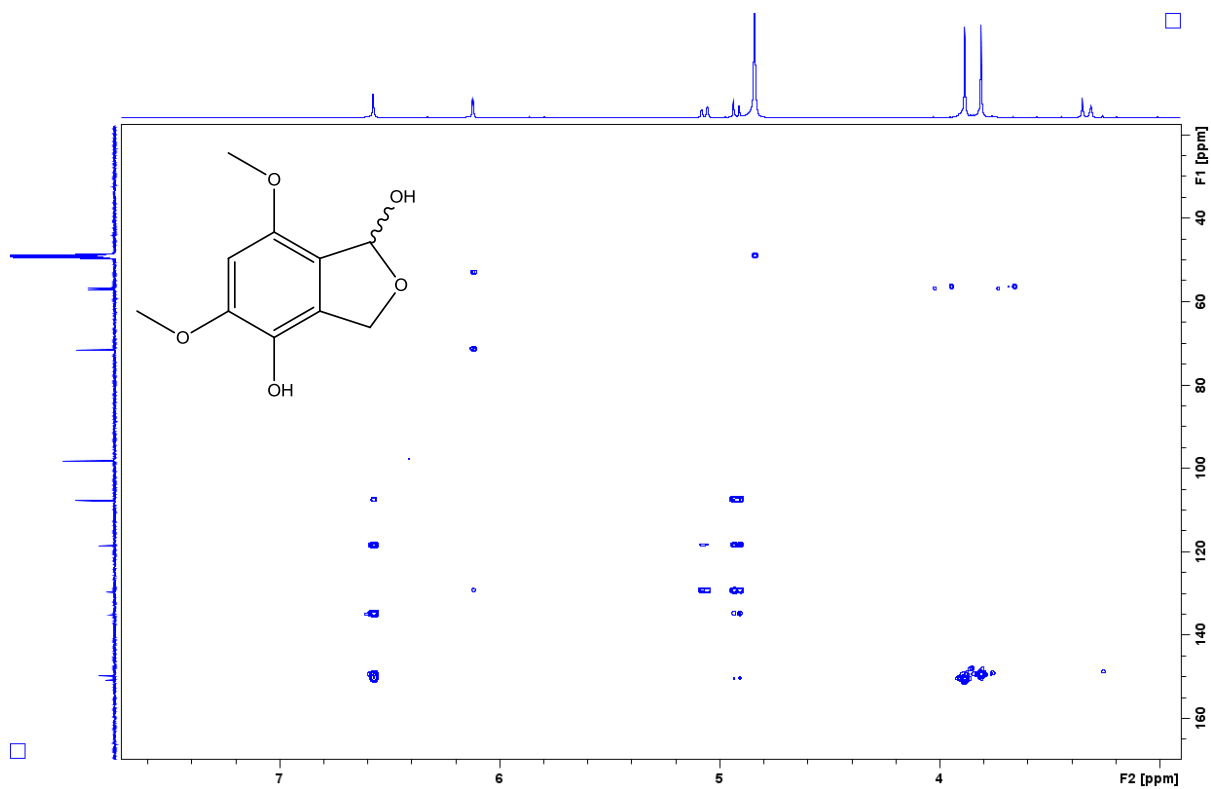

Figure S24. HMBC spectrum (500MHz) of **3** in CD<sub>3</sub>OD.

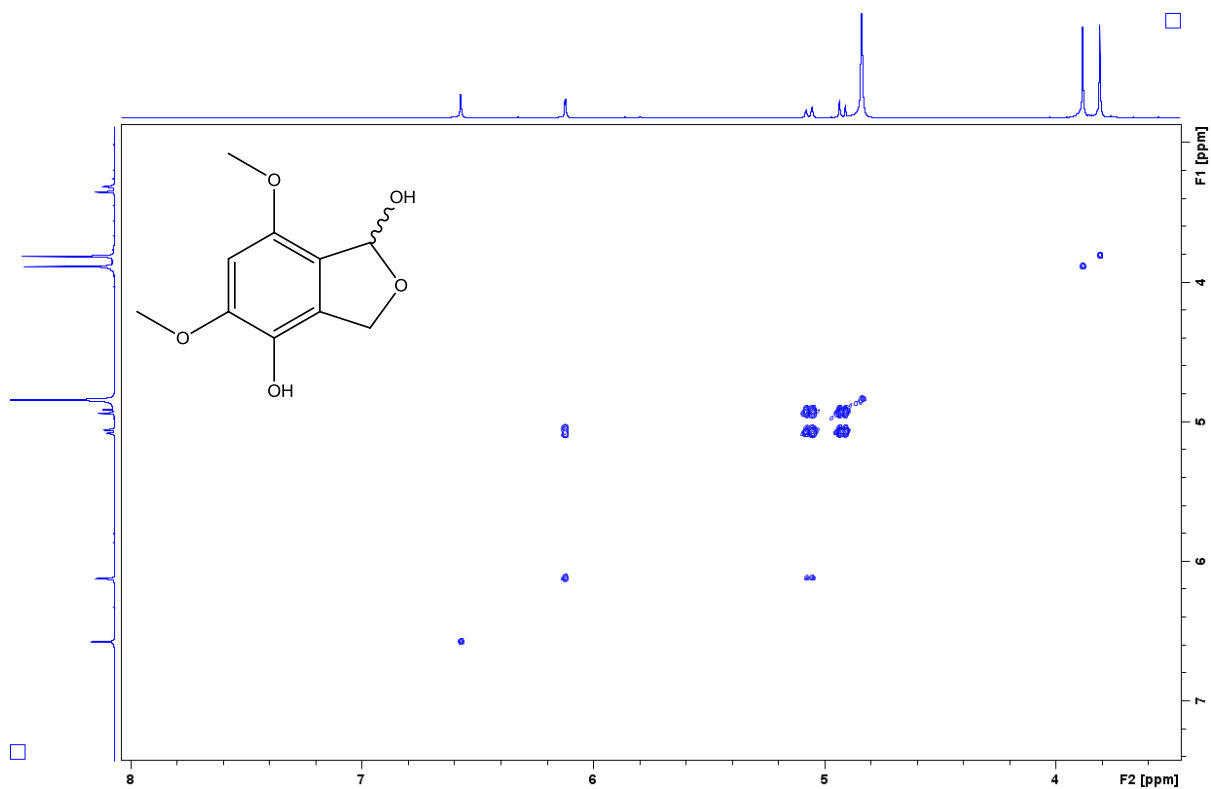

Figure S25. COSY spectrum (500MHz) of **3** in CD<sub>3</sub>OD.

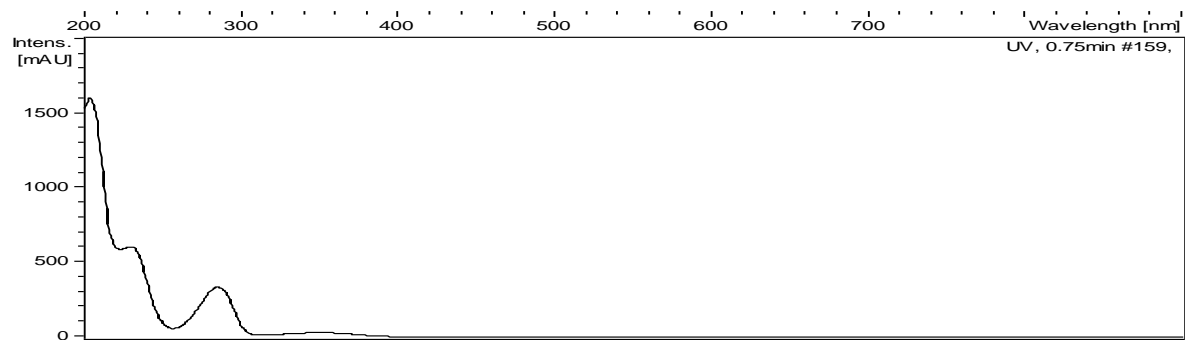

**Figure S26.** UV spectrum of **3**.

### Reference for Supporting Information

1. Seco J.M., Quiñoá E. and Riguera R. The Assignment of Absolute Configuration by NMR. *Chemical Reviews* **104**, 17-117 (2004).
